# Supplementary material for: Metal-free anomalous [5+1] cycloaddition reactions of donor–acceptor aziridines for the synthesis of 2H-1,4-oxazines
Source: Royal Society of Chemistry journal article supplement (doi:10.1039/d3cc02193a), 2023-01-01
Supplement: d3cc02193a1.pdf [file d3cc02193a1.pdf]

**Metal-free anomalous [5+1] cycloaddition reactions of donor-acceptor aziridines  
for the synthesis of 2*H*-1,4-Oxazines**

Jianfeng Zheng\*, Jingzhi Bi, Lan Ma, Lvli Chen, Luhao Tang, Dong Xiong and Yin Tian

## Contents

|                                                                                               |    |
|-----------------------------------------------------------------------------------------------|----|
| 1. General Information.....                                                                   | 3  |
| 2. Preparing of isocyanides <b>2</b> . ....                                                   | 4  |
| 3. Optimization of Reaction Conditions. ....                                                  | 9  |
| 4. General Procedure and Spectral Data of Products <b>3</b> .....                             | 10 |
| 5. Experimental procedure for the scale-up reaction and transformations of the products ..... | 23 |
| 6. X-ray crystallographic data of <b>3aa</b> and <b>3aa'</b> . ....                           | 26 |
| 7. Quantum chemical calculations. ....                                                        | 29 |
| 8. Copy of <sup>1</sup> H NMR and <sup>13</sup> C NMR Spectra.....                            | 38 |
| 9. References.....                                                                            | 68 |

## 1. General Information

Reactions were carried out using commercial reagents in over-dried apparatus.  $\text{CHCl}_3$  was dried over powdered  $\text{CaH}_2$  and distilled under nitrogen just before use.  $^1\text{H}$  NMR spectra were recorded on commercial instruments (400 MHz and 600 MHz). Chemical shifts are recorded in ppm relative to tetramethylsilane and with the solvent resonance as the internal standard ( $\text{CDCl}_3$ ,  $\delta = 7.26$  ppm;  $\text{DMSO-}d_6$ ,  $\delta = 2.50$  ppm). Spectra are reported as follows: chemical shift, multiplicity (s = singlet, d = doublet, t = triplet, m = multiplet), coupling constants (Hz), integration and assignment.  $^{13}\text{C}$  NMR data were collected on commercial instruments (101 MHz and 151 MHz) with complete proton decoupling. Chemical shifts are reported in ppm from the tetramethylsilane with the solvent resonance as internal standard ( $\text{CDCl}_3$ ,  $\delta = 77.0$ ;  $\text{DMSO-}d_6$ ,  $\delta = 39.5$  ppm).  $^{19}\text{F}$  NMR data were collected on commercial instruments (376 MHz) with complete proton decoupling. Melting points (m. p.) were measured on the electrothermal digital melting point apparatus. HRMS was recorded on a commercial apparatus (ESI Source). All 2,2-diester aziridines **1**<sup>1</sup> were prepared according to the literature.

## 2. Preparing of isocyanides 2.

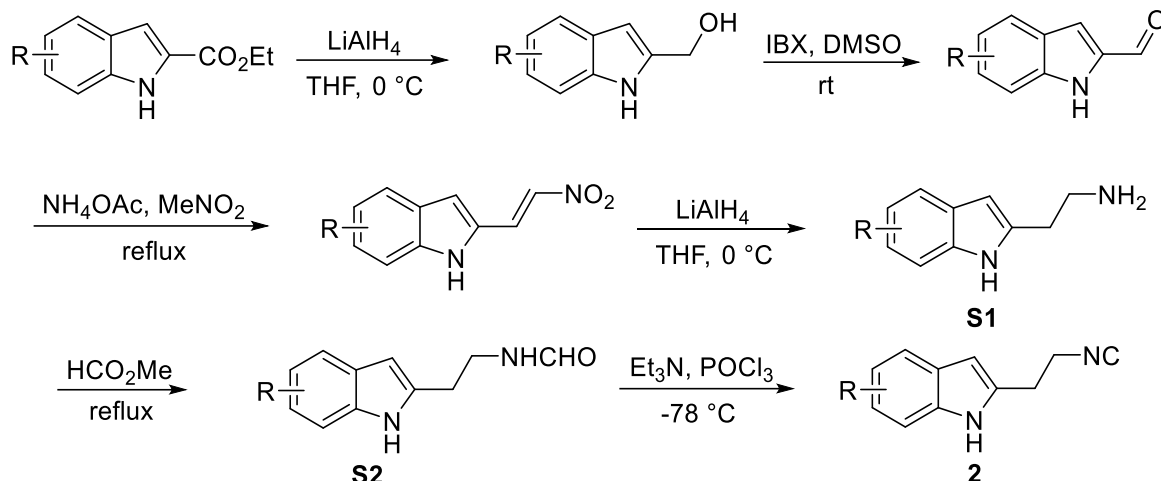

Isocyanides **2** were prepared according to the literature.<sup>2</sup>

For the synthesis of 2-(1H-indol-2-yl)ethan-1-amine **S1**: Under an inert nitrogen atmosphere, to a solution of  $\text{LiAlH}_4$  (60 mmol, 3 equiv.) in THF (30 mL, 2 M) was added dropwise the solution of ethyl indole-2-carboxylate (20 mmol, 1 equiv.) in THF over 15 min at  $0\text{ }^\circ\text{C}$ , and the mixture was stirred at  $0\text{ }^\circ\text{C}$  for 1 h under nitrogen. Then  $\text{H}_2\text{O}$  was carefully added, the cooling bath was removed, and the mixture was stirred at room temperature for 15 min. Next, a mixture of MeOH and  $\text{CH}_2\text{Cl}_2$  (1:8) was added, the obtained emulsion was stirred vigorously for 30 min and then extracted with  $\text{CH}_2\text{Cl}_2$ . The combined organic phases were washed with brine, dried over  $\text{Na}_2\text{SO}_4$ , filtered, and concentrated in vacuo to afford the crude alcohol as a slightly yellow oil, which was directly further used without purification.

To the solution of the above alcohol (18 mmol, 1 equiv.) in DMSO (35 mL, 0.5 M) was added IBX (27 mmol, 1.5 equiv.). The reaction mixture was stirred at room temperature for 2 h. Then the reaction mixture was diluted with water and extracted with ethyl acetate. The organic phase was combined, dried with anhydrous  $\text{Na}_2\text{SO}_4$ . The precipitate was filtered out and the mixture was concentrated under reduced pressure. The obtained residue was purification by flash column chromatography by using petroleum ether/ethyl acetate = 4/1 as eluent to afford the desired aldehyde.

The aldehyde (20 mmol, 1 equiv.) and ammonium acetate (4 mmol, 0.2 equiv.) were refluxed in nitromethane (28 mL) for 2 h. The solvent was removed in vacuo and the residue was washed with water, filtered and concentrated in vacuo to furnish the desired nitroolefin. The crude nitroolefin was used directly without further transformation.

Under an inert nitrogen atmosphere, to a stirred slurry of  $\text{LiAlH}_4$  (60 mmol, 3.3 equiv.) in THF

(80 mL, 0.75 M) was added a solution of crude nitroolefin (18 mmol, 1 equiv.) in THF at 0 °C. The mixture was allowed to warm to room temperature and stirred for 3 h. The reaction was quenched by dropwise addition of water until effervescence ceased. The mixture was then diluted with diethyl ether before addition of a saturated aqueous solution of Rochelle's salt and the subsequent biphasic mixture was stirred for 1 h. The layers were extracted with diethyl ether, dried with anhydrous Na<sub>2</sub>SO<sub>4</sub>, filtered and concentrated in vacuo to furnish the desired 2-(1H-indol-2-yl)ethan-1-amine **S1** which was directly used without that further purification.

For the synthesis of isocyanide **2**: A mixture of crude **S1** in HCO<sub>2</sub>Me (6 mL per 10 mol) was refluxed for 4 h. The crude mixture was concentrated in vacuo and purified by flash column chromatography by using petroleum ether/ethyl acetate = 1/2 as eluent to afford formamide **S2**.

Under an inert nitrogen atmosphere, to a solution of formamide **S2** (17.0 mmol, 1equiv.), Et<sub>3</sub>N (0.85 mol, 5 equiv.), anhydrous DCM (30 mL, 0.57 M) was added dropwise POCl<sub>3</sub> (25 mmol, 1.5 equiv.) at -78 °C over 15 min. After stirring at -78 °C for 3 h, the reaction mixture was poured into ice-cold water carefully and extracted with CH<sub>2</sub>Cl<sub>2</sub>. The combined organic layer was washed with water and brine, dried over Na<sub>2</sub>SO<sub>4</sub>, concentrated and purified by column chromatography to give isocyanide **2** as a yellow solid.

### 2-(2-isocyanoethyl)-1H-indole 2a

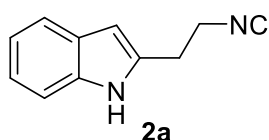

Yellow solid.  $R_f = 0.4$  (PE:EA = 4:1), m.p. 45-47 °C.

<sup>1</sup>H NMR (400 MHz, CDCl<sub>3</sub>)  $\delta$  8.09 (s, 1H), 7.60 (dd,  $J = 8.0, 1.2$  Hz, 1H), 7.37 (dd,  $J = 8.0, 1.2$  Hz, 1H), 7.24 – 7.20 (m, 1H), 7.17 – 7.13 (m, 1H),

6.39 (dd,  $J = 2.0, 0.8$  Hz, 1H), 3.74 – 3.69 (m, 2H), 3.17 – 3.13 (m, 2H).

<sup>13</sup>C NMR (101 MHz, CDCl<sub>3</sub>)  $\delta$  157.4 (t,  $J = 7.0$  Hz), 136.2, 133.9, 128.4, 122.0, 120.3, 120.1, 110.8, 101.2, 41.6 (t,  $J = 7.0$  Hz), 28.6.

HRMS (ESI-TOF) calcd for C<sub>11</sub>H<sub>11</sub>N<sub>2</sub><sup>+</sup> ([M+H<sup>+</sup>]) = 171.0917, Found 171.0918.

### 5-fluoro-2-(2-isocyanoethyl)-1H-indole 2b

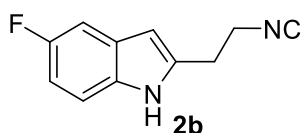

Yellow liquid.  $R_f = 0.3$  (PE:EA = 4:1).

<sup>1</sup>H (400 MHz, CDCl<sub>3</sub>)  $\delta$  8.19 (s, 1H), 7.28 – 7.21 (m, 2H), 6.94 (td,  $J = 9.2, 2.4$  Hz, 1H), 6.35 (d,  $J = 2.4$  Hz, 1H), 3.75 – 3.71 (m, 2H), 3.17 – 3.12

(m, 2H).

$^{13}\text{C}$  (101 MHz,  $\text{CDCl}_3$ ) 158.1 (d,  $J = 231.0$  Hz), 157.4 (t,  $J = 6.0$  Hz), 132.8, 132.7, 128.7 (d,  $J = 10.0$  Hz), 111.3 (d,  $J = 9.0$  Hz), 110.2 (d,  $J = 26.0$  Hz), 105.1 (d,  $J = 24.0$  Hz), 101.4 (d,  $J = 4.0$  Hz), 41.5 (t,  $J = 7.0$  Hz), 28.6.

$^{19}\text{F}$  NMR (376 MHz,  $\text{CDCl}_3$ )  $\delta$  -124.45.

HRMS (ESI-TOF) calcd for  $\text{C}_{11}\text{H}_{10}\text{FN}_2^+$  ( $[\text{M}+\text{H}^+]$ ) = 189.0823, Found 189.0835.

### 5-chloro-2-(2-isocyanoethyl)-1H-indole 2c

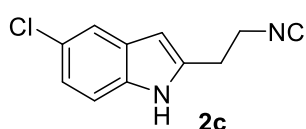

Yellow liquid.  $R_f = 0.4$  (PE:EA = 4:1), m.p. 58-60 °C.

$^1\text{H}$  NMR (400 MHz,  $\text{CDCl}_3$ )  $\delta$  8.26 (s, 1H), 7.54 (d,  $J = 2.0$  Hz, 1H), 7.24 (d,  $J = 8.8$  Hz, 1H), 7.14 (dd,  $J = 8.8, 2.4$  Hz, 1H), 6.31 (d,  $J = 2.4$  Hz, 1H), 3.72 – 3.68 (m, 2H), 3.13 – 3.09 (m, 2H).

$^{13}\text{C}$  NMR (101 MHz,  $\text{CDCl}_3$ )  $\delta$  157.3 (t,  $J = 6.0$  Hz), 135.5, 134.5, 129.5, 125.6, 122.2, 119.6, 111.8, 100.9, 41.5 (t,  $J = 7.0$  Hz), 28.5.

HRMS (ESI-TOF) calcd for  $\text{C}_{11}\text{H}_{10}\text{ClN}_2^+$  ( $[\text{M}+\text{H}^+]$ ) = 205.0527, Found 205.0528.

### 5-bromo-2-(2-isocyanoethyl)-1H-indole 2d

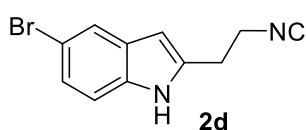

Yellow solid.  $R_f = 0.4$  (PE:EA = 4:1), m.p. 66-68 °C.

$^1\text{H}$  NMR (400 MHz,  $\text{CDCl}_3$ )  $\delta$  8.38 (s, 1H), 7.69 (d,  $J = 2.0$  Hz, 1H), 7.26 (dd,  $J = 8.8, 2.0$  Hz, 1H), 7.17 (d,  $J = 8.8$  Hz, 1H), 6.28 (d,  $J = 2.0$  Hz, 1H), 3.68 – 3.64 (m, 2H), 3.08 – 3.04 (m, 2H).

$^{13}\text{C}$  NMR (101 MHz,  $\text{CDCl}_3$ )  $\delta$  156.9 (t,  $J = 6.0$  Hz), 135.5, 134.8, 130.2, 124.6, 122.7, 113.1, 112.4, 100.7, 41.4 (t,  $J = 7.0$  Hz), 28.4.

HRMS (ESI-TOF) calcd for  $\text{C}_{11}\text{H}_{10}\text{BrN}_2^+$  ( $[\text{M}+\text{H}^+]$ ) = 249.0022, Found 249.0020.

### 2-(2-isocyanoethyl)-5-methyl-1H-indole 2e

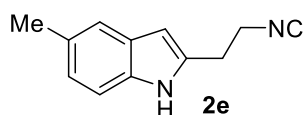

Yellow solid.  $R_f = 0.4$  (PE:EA = 4:1), m.p. 55-57 °C.

$^1\text{H}$  NMR (400 MHz,  $\text{CDCl}_3$ )  $\delta$  7.97 (s, 1H), 7.39 (t,  $J = 1.6$  Hz, 1H), 7.25 (d,  $J = 8.4$  Hz, 1H), 7.05 (d,  $J = 7.6$  Hz, 1H), 6.30 (d,  $J = 2.0$  Hz, 1H), 3.72 – 3.67 (m, 2H), 3.14 – 3.09 (m, 2H), 2.48 (s, 3H).

$^{13}\text{C}$  NMR (101 MHz,  $\text{CDCl}_3$ )  $\delta$  157.2, 134.5, 133.9, 129.3, 128.7, 123.6, 119.9, 110.4, 100.7, 41.6 (t,  $J = 7.0$  Hz), 28.7, 21.5.

HRMS (ESI-TOF) calcd for  $\text{C}_{12}\text{H}_{13}\text{N}_2^+$  ( $[\text{M}+\text{H}^+]$ ) = 185.1073, Found 185.1073.

### 6-chloro-2-(2-isocyanoethyl)-1H-indole 2f

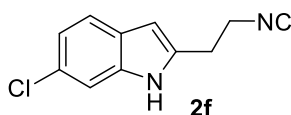

Yellow solid.  $R_f = 0.4$  (PE:EA = 4:1), m.p. 68-70 °C.

$^1\text{H NMR}$  (400 MHz,  $\text{CDCl}_3$ )  $\delta$  8.24 (s, 1H), 7.49 (d,  $J = 8.4$  Hz, 1H), 7.29 – 7.28 (m, 1H), 7.11 (dd,  $J = 8.4, 2.0$  Hz, 1H), 6.35 (d,  $J = 2.0$  Hz, 1H), 3.70

– 3.65 (m, 2H), 3.09 – 3.05 (m, 2H).

$^{13}\text{C NMR}$  (101 MHz,  $\text{CDCl}_3$ )  $\delta$  156.8 (t,  $J = 6.0$  Hz), 136.5, 134.9, 127.5, 127.0, 121.1, 120.7, 110.8, 101.2, 41.4 (t,  $J = 7.0$  Hz), 28.4.

HRMS (ESI-TOF) calcd for  $\text{C}_{11}\text{H}_{10}\text{ClN}_2^+$  ( $[\text{M}+\text{H}^+]$ ) = 205.0527, Found 205.0530.

### 7-bromo-2-(2-isocyanoethyl)-1H-indole 2g

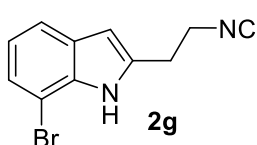

Light yellow solid.  $R_f = 0.4$  (PE:EA = 4:1), m.p. 100-102 °C.

$^1\text{H NMR}$  (400 MHz,  $\text{CDCl}_3$ )  $\delta$  8.41 (s, 1H), 7.54 (d,  $J = 7.6$  Hz, 1H), 7.36 (d,  $J = 7.6$  Hz, 1H), 7.03 (t,  $J = 8.0$  Hz, 1H), 6.47 (d,  $J = 2.4$  Hz, 1H), 3.74 – 3.69

(m, 2H), 3.17 – 3.13 (m, 2H).

$^{13}\text{C NMR}$  (101 MHz,  $\text{CDCl}_3$ )  $\delta$  157.4 (t,  $J = 6.0$  Hz), 134.9, 134.7, 129.5, 124.3, 121.3, 119.5, 104.2, 102.4, 41.3 (t,  $J = 7.0$  Hz), 28.4.

HRMS (ESI-TOF) calcd for  $\text{C}_{11}\text{H}_{10}\text{BrN}_2^+$  ( $[\text{M}+\text{H}^+]$ ) = 249.0022, Found 249.0021.

### 2-(isocyanomethyl)-1H-indole 2h

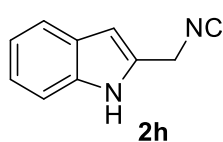

Light yellow solid.  $R_f = 0.4$  (PE:EA = 4:1), m.p. 119-121 °C.

$^1\text{H NMR}$  (400 MHz,  $\text{CDCl}_3$ )  $\delta$  8.35 (s, 1H), 7.63 (d,  $J = 6.8$  Hz, 1H), 7.40 (dd,  $J = 8.4, 1.2$  Hz, 1H), 7.30 – 7.26 (m, 1H), 7.18 (td,  $J = 7.6, 1.2$  Hz, 1H), 6.51 (dd,  $J = 2.4, 1.2$  Hz, 1H), 4.79 (s, 2H).

$^{13}\text{C NMR}$  (101 MHz,  $\text{CDCl}_3$ )  $\delta$  158.3, 136.6, 128.5, 127.8, 123.0, 120.9, 120.5, 111.2, 102.5, 39.7 (t,  $J = 7.0$  Hz).

HRMS (ESI-TOF) calcd for  $\text{C}_{10}\text{H}_9\text{N}_2^+$  ( $[\text{M}+\text{H}^+]$ ) = 157.0760, Found 157.0761.

### 2-(2-isocyanoethyl)-1-methyl-indole 2i

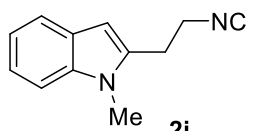

Yellow solid.  $R_f = 0.4$  (PE:EA = 4:1), m.p. 77-79 °C.

$^1\text{H NMR}$  (400 MHz,  $\text{CDCl}_3$ )  $\delta$  7.61 (dt,  $J = 7.8, 1.1$  Hz, 1H), 7.33 (dt,  $J = 8.2, 0.9$  Hz, 1H), 7.29 – 7.22 (m, 1H), 7.17 – 7.13 (m, 1H), 6.39 (d,  $J = 1.0$  Hz, 1H), 3.84 – 3.62 (m, 5H), 3.21 (t,  $J = 7.3$  Hz, 2H).

$^{13}\text{C NMR}$  (101 MHz,  $\text{CDCl}_3$ )  $\delta$  157.5 (t,  $J = 6.0$  Hz), 137.5, 135.1, 127.6, 121.6, 120.3, 119.8, 109.1, 100.1, 40.8 (t,  $J = 7.0$  Hz), 29.7, 27.1.

HRMS (ESI-TOF) calcd for  $C_{12}H_{13}N_2^+$  ( $[M+H^+]$ ) = 185.1073, Found 185.1072.



### 3. Optimization of Reaction Conditions

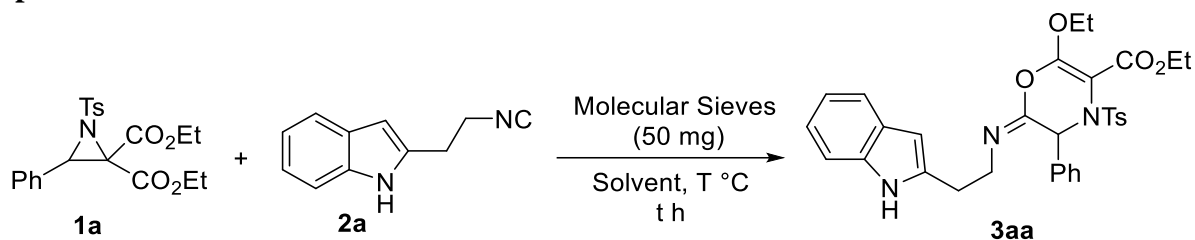

| Entry <sup>a</sup> | Molecular Sieves | Solvent                              | <b>1a:2a</b> | T (°C) | Yield (%) <sup>b</sup> <b>3aa</b> |
|--------------------|------------------|--------------------------------------|--------------|--------|-----------------------------------|
| 1                  | 4 Å MS           | CH <sub>2</sub> Cl <sub>2</sub>      | 1.5:1        | 35     | 54                                |
| 2                  | 4 Å MS           | CHCl <sub>3</sub>                    | 1.5:1        | 35     | 68                                |
| 3                  | 4 Å MS           | ClCH <sub>2</sub> CH <sub>2</sub> Cl | 1.5:1        | 35     | 50                                |
| 4                  | 4 Å MS           | THF                                  | 1.5:1        | 35     | N.R.                              |
| 5                  | 4 Å MS           | Toluene                              | 1.5:1        | 35     | 30                                |
| 6                  | 4 Å MS           | EtOAc                                | 1.5:1        | 35     | N.R.                              |
| 7                  | 4 Å MS           | Et <sub>2</sub> O                    | 1.5:1        | 35     | 25                                |
| 8                  | 4 Å MS           | CH <sub>3</sub> CN                   | 1.5:1        | 35     | N.R.                              |
| 9                  | 4 Å MS           | DMF                                  | 1.5:1        | 35     | N.R.                              |
| 10                 | 4 Å MS           | CHCl <sub>3</sub>                    | 2:1          | 35     | 71                                |
| 11                 | 4 Å MS           | CHCl <sub>3</sub>                    | 2:1          | rt     | 37                                |
| 12                 | 4 Å MS           | CHCl <sub>3</sub>                    | 2:1          | 50     | 75                                |
| 13                 | 4 Å MS           | CHCl <sub>3</sub>                    | 2:1          | 60     | 55                                |
| 14                 |                  | CHCl <sub>3</sub>                    | 2:1          | 50     | 53                                |
| 15                 | 3 Å MS           | CHCl <sub>3</sub>                    | 2:1          | 50     | 79                                |
| 16                 | 5 Å MS           | CHCl <sub>3</sub>                    | 2:1          | 50     | 68                                |
| 17 <sup>c</sup>    | 3 Å MS           | CHCl <sub>3</sub>                    | 2:1          | 50     | 82                                |
| 18 <sup>d</sup>    | 3 Å MS           | CHCl <sub>3</sub>                    | 2:1          | 50     | 64                                |
| 19 <sup>e</sup>    | 3 Å MS           | CHCl <sub>3</sub>                    | 2:1          | 50     | 78                                |

<sup>a</sup>Unless otherwise noted, the reactions were performed with 4 Å MS (50 mg), **1a** (0.15 mmol or 0.2 mmol) and **2a** (0.10 mmol) in indicated solvent (0.5 mL) at indicated temperature for 24 h or 6 h. <sup>b</sup>The yield of isolated product for **3aa**.

<sup>c</sup>with 3 Å MS (25 mg). <sup>d</sup>with 3 Å MS (100 mg). <sup>e</sup>With CHCl<sub>3</sub> (1.0 mL).

#### 4. General Procedure and Spectral Data of Products 3

A dry reaction tube was charged with aziridines **1** (0.2 mmol, 2 equiv.), isocyanides **2** (0.1 mmol, 1 equiv.) and 3 Å MS (25 mg), CHCl<sub>3</sub> (0.5 mL, 0.25 M) was added. The reaction mixture continued stirring at 50 °C for 7 h. The residue was directly purified by flash chromatography on silica gel using petroleum ether/ethyl acetate= 2/1 as eluent to afford the desired products **3**.

##### Ethyl (Z)-2-((2-(1H-indol-2-yl)ethyl)imino)-6-ethoxy-3-phenyl-4-tosyl-3,4-dihydro-2H-1,4-oxazine-5-carboxylate **3aa**

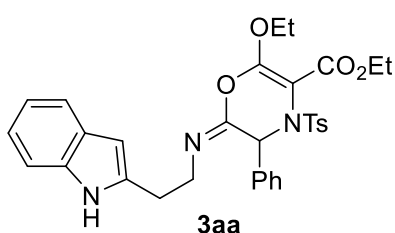

The reaction was run at 50 °C for 7 h, affording product **3aa** in 82% yield (48.2 mg) as a white solid.  $R_f = 0.3$  (PE:EA = 2:1), m.p. 111-113 °C.

<sup>1</sup>H NMR (400 MHz, CDCl<sub>3</sub>)  $\delta$  8.69 (s, 1H), 7.81 (d,  $J = 8.4$  Hz, 2H), 7.58 (dd,  $J = 6.8$  Hz, 1H), 7.41 – 7.36 (m, 3H), 7.31 – 7.26 (m, 1H),

7.24 – 7.15 (m, 3H), 7.14 – 7.09 (m, 3H), 6.29 (d,  $J = 1.2$  Hz, 1H), 5.70 (s, 1H), 4.33 – 4.22 (m, 2H), 4.05 (dq,  $J = 10.0, 7.2$  Hz, 1H), 3.90 (dq,  $J = 10.0, 7.2$  Hz, 1H), 3.68 – 3.61 (m, 1H), 3.15 – 2.94 (m, 3H), 2.35 (s, 3H), 1.36 (t,  $J = 7.2$  Hz, 3H), 1.10 (t,  $J = 7.2$  Hz, 3H).

<sup>13</sup>C NMR (101 MHz, CDCl<sub>3</sub>)  $\delta$  163.2, 156.6, 146.0, 144.7, 138.1, 136.2, 133.3, 132.8, 129.6, 128.7, 128.7, 128.4, 128.3, 126.3, 121.4, 119.8, 119.7, 110.7, 100.0, 93.0, 67.1, 60.9, 58.0, 46.4, 28.7, 21.5, 14.4, 14.2.

HRMS (ESI-TOF) calcd for C<sub>32</sub>H<sub>34</sub>N<sub>3</sub>O<sub>6</sub>S<sup>+</sup> ([M+H<sup>+</sup>]) = 588.2163, Found 588.2166.

##### Ethyl (Z)-2-((2-(1H-indol-2-yl)ethyl)imino)-6-ethoxy-3-phenyl-4-(phenylsulfonyl)-3,4-dihydro-2H-1,4-oxazine-5-carboxylate **3ba**

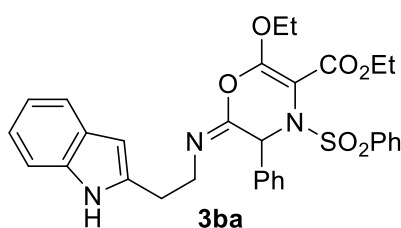

The reaction was run at 50 °C for 7 h, affording product **3ba** in 63% yield (36.1 mg) as a white solid.  $R_f = 0.3$  (PE:EA = 2:1), m.p. 119-121 °C.

<sup>1</sup>H NMR (400 MHz, CDCl<sub>3</sub>)  $\delta$  8.65 (s, 1H), 7.95 – 7.93 (m, 2H), 7.59 – 7.55 (m, 2H), 7.39 – 7.35 (m, 5H), 7.30 – 7.25 (m, 1H), 7.22

– 7.09 (m, 4H), 6.28 (d,  $J = 1.2$  Hz, 1H), 5.74 (s, 1H), 4.32 – 4.23 (m, 2H), 4.03 (dq,  $J = 10.0, 7.2$  Hz, 1H), 3.88 (dq,  $J = 10.0, 7.2$  Hz, 1H), 3.66 – 3.59 (m, 1H), 3.17 – 2.99 (m, 3H), 1.35 (t,  $J = 7.2$  Hz, 3H), 1.09 (t,  $J = 7.2$  Hz, 3H).

<sup>13</sup>C NMR (101 MHz, CDCl<sub>3</sub>)  $\delta$  163.2, 156.7, 145.8, 138.0, 136.1, 136.1, 133.6, 132.8, 129.0, 128.7,

128.7, 128.4, 128.3, 126.2, 121.4, 119.8, 119.7, 110.7, 100.1, 92.8, 67.1, 60.9, 58.2, 46.3, 28.7, 14.4, 14.2.

HRMS (ESI-TOF) calcd for  $C_{31}H_{32}N_3O_6S^+$  ( $[M+H]^+$ ) = 574.2006, Found 574.2011.

**Ethyl (Z)-2-((2-(1H-indol-2-yl)ethyl)imino)-6-ethoxy-3-(o-tolyl)-4-tosyl-3,4-dihydro-2H-1,4-oxazine-5-carboxylate 3ca**

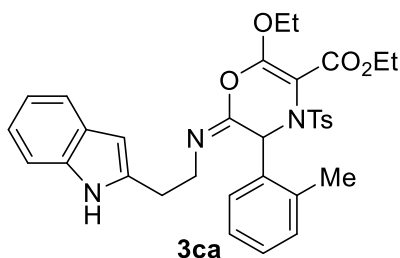

The reaction was run at 50 °C for 7 h, affording product **3ca** in 50% yield (29.9 mg) as a white solid.  $R_f$  = 0.3 (PE:EA = 2:1), m.p. 123–125 °C.

$^1H$  NMR (400 MHz,  $CDCl_3$ )  $\delta$  8.47 (s, 1H), 7.69 – 7.67 (m, 2H), 7.58 – 7.55 (m, 1H), 7.31 – 7.28 (m, 1H), 7.26 – 7.19 (m, 2H), 7.17

– 7.09 (m, 2H), 7.03 (d,  $J$  = 8.0 Hz, 2H), 6.84 (td,  $J$  = 7.6, 2.0 Hz, 1H), 6.46 (d,  $J$  = 7.6 Hz, 1H), 6.25 (d,  $J$  = 0.8 Hz, 1H), 5.93 (s, 1H), 4.16 (dq,  $J$  = 9.6, 6.8 Hz, 1H), 4.09 – 3.95 (m, 3H), 3.63 – 3.54 (m, 1H), 3.03 – 2.92 (m, 3H), 2.73 (s, 3H), 2.37 (s, 3H), 1.26 (t,  $J$  = 7.2 Hz, 3H), 1.18 (t,  $J$  = 7.2 Hz, 3H).  $^{13}C$  NMR (101 MHz,  $CDCl_3$ )  $\delta$  163.1, 157.8, 147.0, 144.5, 139.2, 138.0, 136.1, 132.7, 131.7, 131.0, 129.4, 129.1, 128.4, 128.4, 126.0, 125.6, 121.4, 119.8, 119.7, 110.7, 100.0, 92.1, 67.2, 60.5, 57.5, 46.3, 28.6, 21.5, 19.9, 14.9, 13.9.

HRMS (ESI-TOF) calcd for  $C_{33}H_{36}N_3O_6S^+$  ( $[M+H]^+$ ) = 602.2319, Found 602.2325.

**Ethyl (Z)-2-((2-(1H-indol-2-yl)ethyl)imino)-6-ethoxy-3-(m-tolyl)-4-tosyl-3,4-dihydro-2H-1,4-oxazine-5-carboxylate 3da**

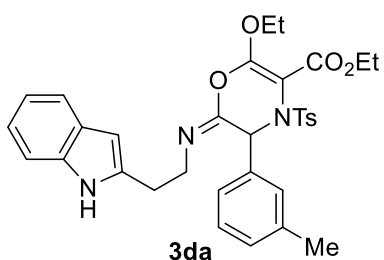

The reaction was run at 50 °C for 7 h, affording product **3da** in 68% yield (40.9 mg) as a white solid.  $R_f$  = 0.2 (PE:EA = 2:1), m.p. 68–70 °C.

$^1H$  NMR (400 MHz,  $CDCl_3$ )  $\delta$  8.71 (s, 1H), 7.80 – 7.78 (m, 2H), 7.58 (d,  $J$  = 8.0 Hz, 1H), 7.38 – 7.36 (m, 2H), 7.19 – 7.07 (m, 7H), 6.28

(d,  $J$  = 1.2 Hz, 1H), 5.69 (s, 1H), 4.33 – 4.24 (m, 2H), 4.05 (dq,  $J$  = 10.0, 7.2 Hz, 1H), 3.91 (dq,  $J$  = 10.0, 7.2 Hz, 1H), 3.65 – 3.59 (m, 1H), 3.11 – 2.96 (m, 3H), 2.34 (s, 3H), 2.28 (s, 3H), 1.37 (t,  $J$  = 7.2 Hz, 3H), 1.12 (t,  $J$  = 7.2 Hz, 3H).

$^{13}C$  NMR (101 MHz,  $CDCl_3$ )  $\delta$  163.2, 156.5, 146.0, 144.7, 138.6, 138.2, 136.2, 133.3, 132.8, 129.6, 129.5, 128.5, 128.4, 128.3, 127.1, 123.1, 121.4, 119.8, 119.7, 110.7, 99.9, 93.0, 67.1, 60.8, 58.0, 46.31, 28.6, 21.5, 21.4, 14.5, 14.2.

HRMS (ESI-TOF) calcd for  $C_{33}H_{36}N_3O_6S^+$  ( $[M+H]^+$ ) = 602.2319, Found 602.2326.

**Ethyl (Z)-2-((2-(1H-indol-2-yl)ethyl)imino)-3-(3-chlorophenyl)-6-ethoxy-4-tosyl-3,4-dihydro-2H-1,4-oxazine-5-carboxylate 3ea**

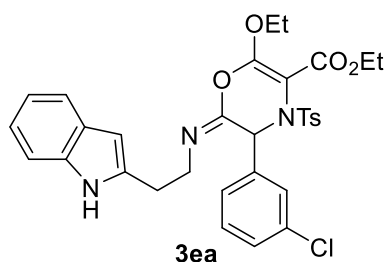

The reaction was run at 50 °C for 7 h, affording product **3ea** in 77% yield (47.8 mg) as a white solid.  $R_f$  = 0.3 (PE:EA = 2:1), m.p. 56–58 °C.

$^1H$  NMR (400 MHz,  $CDCl_3$ )  $\delta$  8.62 (s, 1H), 7.78 – 7.76 (m, 2H), 7.65 (q,  $J$  = 1.6 Hz, 1H), 7.58 (d,  $J$  = 7.6 Hz, 1H), 7.39 (d,  $J$  = 7.6 Hz, 1H), 7.28 – 7.25 (m, 1H), 7.20 – 7.05 (m, 6H), 6.29 (d,  $J$  = 1.2 Hz, 1H), 5.68 (s, 1H), 4.35 – 4.25 (m, 2H), 4.06 (dq,  $J$  = 10.0, 7.2 Hz, 1H), 3.92 (dq,  $J$  = 10.0, 7.2 Hz, 1H), 3.66 – 3.59 (m, 1H), 3.11 – 2.97 (m, 3H), 2.35 (s, 3H), 1.40 (t,  $J$  = 7.2 Hz, 3H), 1.13 (t,  $J$  = 7.2 Hz, 3H).

$^{13}C$  NMR (101 MHz,  $CDCl_3$ )  $\delta$  163.0, 156.4, 145.4, 144.9, 137.9, 136.2, 135.0, 134.9, 133.0, 130.0, 129.6, 129.0, 128.4, 128.3, 126.8, 124.2, 121.4, 119.9, 119.7, 110.7, 100.1, 92.8, 67.3, 61.1, 57.7, 46.4, 28.7, 21.5, 14.5, 14.2.

HRMS (ESI-TOF) calcd for  $C_{32}H_{33}ClN_3O_6S^+$  ( $[M+H]^+$ ) = 622.1773, Found 622.1780.

**Ethyl (Z)-2-((2-(1H-indol-2-yl)ethyl)imino)-6-ethoxy-3-(p-tolyl)-4-tosyl-3,4-dihydro-2H-1,4-oxazine-5-carboxylate 3fa**

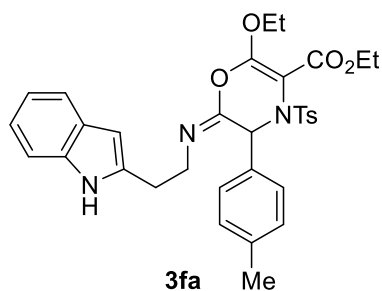

The reaction was run at 50 °C for 7 h, affording product **3fa** in 87% yield (52.3 mg) as a white solid.  $R_f$  = 0.3 (PE:EA = 2:1), m.p. 140–142 °C.

$^1H$  NMR (400 MHz,  $CDCl_3$ )  $\delta$  8.72 (s, 1H), 7.81 (dd,  $J$  = 6.8, 2.0 Hz, 2H), 7.58 (dd,  $J$  = 7.6, 1.2 Hz, 1H), 7.37 (dd,  $J$  = 8.0, 1.2 Hz, 1H), 7.26 (dd,  $J$  = 8.4, 0.8 Hz, 2H), 7.19 – 7.08 (m, 4H), 7.02 (d,  $J$  = 8.0 Hz, 2H), 6.28 (d,  $J$  = 1.6 Hz, 1H), 5.66 (s, 1H), 4.32 – 4.24 (m, 2H), 4.05 (dq,  $J$  = 10.0, 7.2 Hz, 1H), 3.90 (dq,  $J$  = 10.0, 7.2 Hz, 1H), 3.56 – 3.59 (m, 1H), 3.16 – 2.94 (m, 3H), 2.35 (s, 3H), 2.31 (s, 3H), 1.36 (t,  $J$  = 7.2 Hz, 3H), 1.12 (t,  $J$  = 7.2 Hz, 3H).

$^{13}C$  NMR (101 MHz,  $CDCl_3$ )  $\delta$  163.3, 156.6, 146.2, 144.7, 138.5, 138.2, 136.2, 133.4, 129.8, 129.6, 129.4, 128.4, 128.3, 126.2, 121.3, 119.8, 119.7, 110.8, 99.9, 92.8, 67.1, 60.8, 57.9, 46.4, 28.6, 21.5, 21.1, 14.5, 14.2.

HRMS (ESI-TOF) calcd for  $C_{33}H_{36}N_3O_6S^+$  ( $[M+H]^+$ ) = 602.2319, Found 602.2320.

**Ethyl (Z)-2-((2-(1H-indol-2-yl)ethyl)imino)-6-ethoxy-3-(4-isopropylphenyl)-4-tosyl-3,4-dihydro-2H-1,4-oxazine-5-carboxylate 3ga**

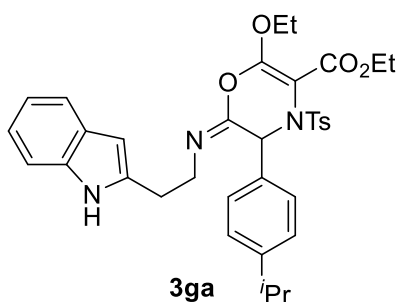

The reaction was run at 50 °C for 7 h, affording product **3ga** in 87% yield (54.8 mg) as a white solid.  $R_f = 0.3$  (PE:EA = 2:1), m.p. 127-129 °C.

$^1\text{H NMR}$  (400 MHz,  $\text{CDCl}_3$ )  $\delta$  8.68 (s, 1H), 7.83 – 7.81 (m, 2H), 7.57 (d,  $J = 7.6$  Hz, 1H), 7.36 (d,  $J = 8.4$  Hz, 1H), 7.28 – 7.25 (m, 2H), 7.19 – 7.15 (m, 1H), (td,  $J = 8.0, 7.6, 1.4$  Hz, 1H), 7.15 – 7.10

(m, 3H), 7.05 – 7.03 (m, 2H), 6.28 (d,  $J = 2.0$  Hz, 1H), 5.65 (s, 1H), 4.33 – 4.24 (m, 2H), 4.05 (dq,  $J = 10.0, 7.2$  Hz, 1H), 3.91 (dq,  $J = 10.0, 7.2$  Hz, 1H), 3.71 – 3.58 (m, 1H), 3.17 – 3.11 (m, 1H), 3.09 – 2.95 (m, 2H), 2.89 – 2.80 (m, 1H), 2.36 (s, 3H), 1.36 (t,  $J = 7.2$  Hz, 3H), 1.22 (d,  $J = 2.4$  Hz, 3H), 1.20 (d,  $J = 2.8$  Hz, 3H), 1.10 (t,  $J = 7.2$  Hz, 3H).

$^{13}\text{C NMR}$  (101 MHz,  $\text{CDCl}_3$ )  $\delta$  163.3, 156.6, 149.4, 146.2, 144.6, 138.2, 136.2, 133.4, 130.1, 129.6, 128.4, 128.4, 126.8, 126.2, 121.3, 119.8, 119.7, 110.8, 100.0, 93.0, 67.1, 60.8, 57.9, 46.4, 33.7, 28.7, 23.8, 23.8, 21.5, 14.4, 14.2.

HRMS (ESI-TOF) calcd for  $\text{C}_{35}\text{H}_{40}\text{N}_3\text{O}_6\text{S}^+$  ( $[\text{M}+\text{H}^+]$ ) = 630.2632, Found 630.2638.

**Ethyl (Z)-2-((2-(1H-indol-2-yl)ethyl)imino)-3-([1,1'-biphenyl]-4-yl)-6-ethoxy-4-tosyl-3,4-dihydro-2H-1,4-oxazine-5-carboxylate 3ha**

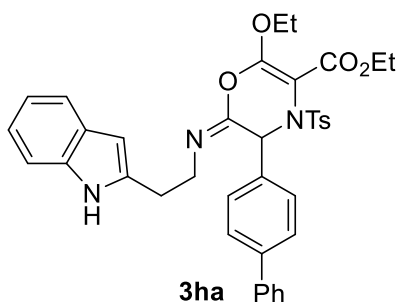

The reaction was run at 50 °C for 7 h, affording product **3ha** in 87% yield (57.7 mg) as a white solid.  $R_f = 0.3$  (PE:EA = 2:1), m.p. 123-125 °C.

$^1\text{H NMR}$  (400 MHz,  $\text{CDCl}_3$ )  $\delta$  8.68 (s, 1H), 7.85 – 7.82 (m, 2H), 7.59 (d,  $J = 6.4$  Hz, 1H), 7.55 – 7.53 (m, 2H), 7.49 – 7.35 (m, 8H), 7.18 (td,  $J = 7.2, 1.2$  Hz, 1H), 7.15 – 7.11 (m, 3H), 6.30 (d,  $J = 1.2$

Hz, 1H), 5.72 (s, 1H), 4.36 – 4.24 (m, 2H), 4.08 (dq,  $J = 10.0, 7.2$  Hz, 1H), 3.93 (dq,  $J = 10.0, 7.2$  Hz, 1H), 3.72 – 3.65 (m, 1H), 3.18 – 2.97 (m, 3H), 2.37 (s, 3H), 1.37 (t,  $J = 7.2$  Hz, 3H), 1.13 (t,  $J = 7.2$  Hz, 3H).

$^{13}\text{C NMR}$  (101 MHz,  $\text{CDCl}_3$ )  $\delta$  163.3, 156.6, 146.0, 144.7, 141.5, 140.2, 138.1, 136.2, 133.3, 131.8, 129.6, 128.8, 128.5, 128.4, 127.6, 127.4, 127.0, 126.7, 121.4, 119.9, 119.7, 110.8, 100.0, 92.9, 67.2, 60.9, 58.0, 46.4, 28.7, 21.6, 14.5, 14.2.

HRMS (ESI-TOF) calcd for  $C_{38}H_{38}N_3O_6S^+$  ( $[M+H^+]$ ) = 664.2476, Found 664.2476.

**Ethyl (Z)-2-((2-(1H-indol-2-yl)ethyl)imino)-6-ethoxy-3-(4-fluorophenyl)-4-tosyl-3,4-dihydro-2H-1,4-oxazine-5-carboxylate 3ia**

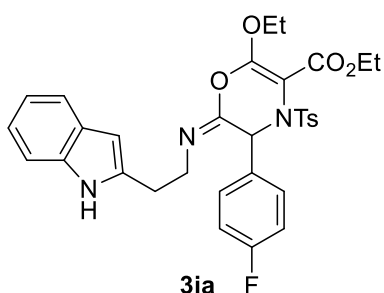

The reaction was run at 50 °C for 7 h, affording product **3ia** in 83% yield (50.2 mg) as a white solid.  $R_f = 0.3$  (PE:EA = 2:1), m.p. 124–126 °C.

$^1H$  NMR (400 MHz,  $CDCl_3$ )  $\delta$  8.61 (s, 1H), 7.80 – 7.78 (m, 2H), 7.57 (d,  $J = 8.0$  Hz, 1H), 7.38 – 7.30 (m, 3H), 7.20 – 7.10 (m, 4H), 6.86 – 6.82 (m, 2H), 6.28 (d,  $J = 1.2$  Hz, 1H), 5.64 (s, 1H), 4.32 – 4.24 (m,

2H), 4.05 (dq,  $J = 10.0, 7.2$  Hz, 1H), 3.90 (dq,  $J = 10.0, 7.2$  Hz, 1H), 3.68 – 3.60 (m, 1H), 3.13 – 2.97 (m, 3H), 2.36 (s, 3H), 1.35 (t,  $J = 7.2$  Hz, 3H), 1.11 (t,  $J = 7.2$  Hz, 3H).

$^{13}C$  NMR (101 MHz,  $CDCl_3$ )  $\delta$  163.2, 162.8 (d,  $J = 246.0$  Hz), 156.4, 145.7, 144.8, 137.9, 136.1, 133.2, 129.6, 128.5 (d,  $J = 4.0$  Hz), 128.5, 128.3, 128.2, 128.1, 121.5, 119.8, 119.8, 115.7 (d,  $J = 22.0$  Hz), 110.7, 100.0, 92.9, 67.2, 61.0, 57.5, 46.4, 29.7, 28.7, 21.5, 14.5, 14.2.

$^{19}F$  NMR (376 MHz,  $CDCl_3$ )  $\delta$  -113.09.

HRMS (ESI-TOF) calcd for  $C_{32}H_{33}FN_3O_6S^+$  ( $[M+H^+]$ ) = 606.2069, Found 606.2078.

**Ethyl (Z)-2-((2-(1H-indol-2-yl)ethyl)imino)-6-ethoxy-3-(4-chlorophenyl)-4-tosyl-3,4-dihydro-2H-1,4-oxazine-5-carboxylate 3ja**

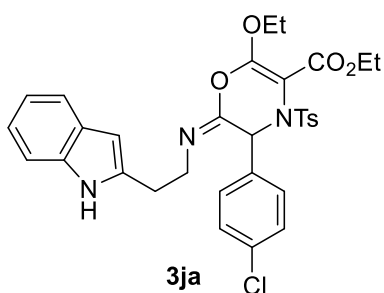

The reaction was run at 50 °C for 7 h, affording product **3ja** in 86% yield (53.4 mg) as a white solid.  $R_f = 0.3$  (PE:EA = 2:1), m.p. 141–143 °C.

$^1H$  NMR (400 MHz,  $CDCl_3$ )  $\delta$  8.60 (s, 1H), 7.80 – 7.77 (m, 2H), 7.57 (d,  $J = 7.6$  Hz, 1H), 7.38 (d,  $J = 8.0$  Hz, 1H), 7.31 – 7.27 (m, 2H), 7.21 – 7.10 (m, 6H), 6.28 (d,  $J = 1.2$  Hz, 1H), 5.63 (s, 1H), 4.32 –

4.24 (m, 2H), 4.05 (dq,  $J = 10.0, 7.0$  Hz, 1H), 3.90 (dq,  $J = 10.0, 7.2$  Hz, 1H), 3.67 – 3.55 (m, 1H), 3.14 – 2.94 (m, 3H), 2.36 (s, 3H), 1.36 (t,  $J = 7.2$  Hz, 3H), 1.13 (t,  $J = 7.2$  Hz, 3H).

$^{13}C$  NMR (101 MHz,  $CDCl_3$ )  $\delta$  163.1, 156.4, 145.6, 144.8, 137.9, 136.1, 134.7, 133.1, 131.4, 129.6, 128.9, 128.4, 128.3, 127.7, 121.5, 119.9, 119.8, 110.7, 100.0, 92.8, 67.2, 61.0, 57.6, 46.4, 28.7, 21.6, 14.5, 14.2.

HRMS (ESI-TOF) calcd for  $C_{32}H_{33}ClN_3O_6S^+$  ( $[M+H^+]$ ) = 622.1773, Found 622.1773.

**Ethyl (Z)-2-((2-(1H-indol-2-yl)ethyl)imino)-6-ethoxy-3-(4-bromophenyl)-4-tosyl-3,4-dihydro-2H-1,4-oxazine-5-carboxylate 3ka**

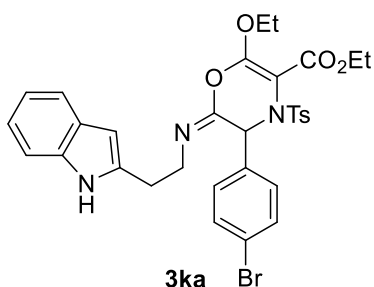

The reaction was run at 50 °C for 7 h, affording product **3ka** in 81% yield (53.9 mg) as a white solid.  $R_f = 0.2$  (PE:EA = 2:1), m.p. 142–144 °C.

$^1\text{H NMR}$  (400 MHz,  $\text{CDCl}_3$ )  $\delta$  8.60 (s, 1H), 7.80 – 7.78 (m, 2H), 7.57 (d,  $J = 7.6$  Hz, 1H), 7.37 (d,  $J = 8.0$  Hz, 1H), 7.28 – 7.07 (m, 9H), 6.27 (d,  $J = 0.8$  Hz, 1H), 5.60 (s, 1H), 4.32 – 4.24 (m, 2H), 4.05 (dq,

$J = 10.0, 7.2$  Hz, 1H), 3.90 (dq,  $J = 10.0, 7.2$  Hz, 1H), 3.67 – 3.61 (m, 1H), 3.14 – 2.94 (m, 3H), 2.36 (s, 3H), 1.35 (t,  $J = 7.2$  Hz, 3H), 1.13 (t,  $J = 7.2$  Hz, 3H).

$^{13}\text{C NMR}$  (101 MHz,  $\text{CDCl}_3$ )  $\delta$  163.1, 156.5, 145.5, 144.8, 137.9, 136.1, 133.1, 132.0, 131.9, 129.6, 128.5, 128.3, 128.0, 122.9, 121.5, 119.9, 119.8, 110.7, 100.0, 92.8, 67.2, 61.0, 57.7, 46.4, 28.7, 21.6, 14.5, 14.2.

HRMS (ESI-TOF) calcd for  $\text{C}_{32}\text{H}_{33}\text{BrN}_3\text{O}_6\text{S}^+$  ( $[\text{M}+\text{H}^+]$ ) = 666.1268, Found 666.1267.

**Ethyl (Z)-2-((2-(1H-indol-2-yl)ethyl)imino)-6-ethoxy-3-(4-(trifluoromethyl)phenyl)-4-tosyl-3,4-dihydro-2H-1,4-oxazine-5-carboxylate 3la**

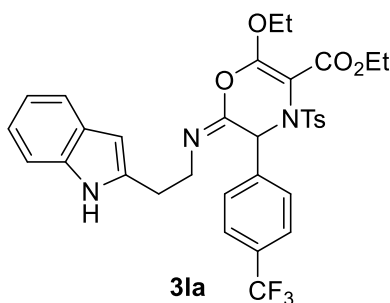

The reaction was run at 50 °C for 7 h, affording product **3la** in 72% yield (47.2 mg) as a yellow solid.  $R_f = 0.3$  (PE:EA = 2:1), m.p. 134–136 °C.

$^1\text{H NMR}$  (400 MHz,  $\text{CDCl}_3$ )  $\delta$  8.55 (s, 1H), 7.81 (d,  $J = 8.4$  Hz, 2H), 7.57 (d,  $J = 7.6$  Hz, 1H), 7.45 (d,  $J = 8.8$  Hz, 2H), 7.36 (d,  $J = 8.4$  Hz, 3H), 7.20 – 7.11 (m, 4H), 6.28 (d,  $J = 0.8$  Hz, 1H), 5.69 (s, 1H),

4.35 – 4.23 (m, 2H), 4.06 (dq,  $J = 10.0, 7.2$  Hz, 1H), 3.91 (dq,  $J = 10.0, 7.2$  Hz, 1H), 3.71 – 3.64 (m, 1H), 3.18 – 2.96 (m, 3H), 2.37 (s, 3H), 1.36 (t,  $J = 7.2$  Hz, 3H), 1.13 (t,  $J = 7.2$  Hz, 3H).

$^{13}\text{C NMR}$  (151 MHz,  $\text{CDCl}_3$ )  $\delta$  163.1, 156.4, 145.4, 144.9, 137.8, 136.9, 136.1, 133.0, 130.9 (q,  $J = 31.5$  Hz), 129.7, 128.5, 128.4, 126.7, 125.7 (q,  $J = 3.0$  Hz), 123.8 (q,  $J = 271.5$  Hz), 121.5, 119.9, 119.9, 110.7, 100.1, 92.8, 67.3, 61.1, 57.8, 46.4, 28.7, 21.6, 14.4, 14.2.

$^{19}\text{F NMR}$  (376 MHz,  $\text{CDCl}_3$ )  $\delta$  -62.80.

HRMS (ESI-TOF) calcd for  $\text{C}_{33}\text{H}_{33}\text{F}_3\text{N}_3\text{O}_6\text{S}^+$  ( $[\text{M}+\text{H}^+]$ ) = 656.2037, Found 656.2041.

**Ethyl (Z)-2-((2-(1H-indol-2-yl)ethyl)imino)-6-ethoxy-3-(4-nitrophenyl)-4-tosyl-3,4-dihydro-**

### 2H-1,4-oxazine-5-carboxylate **3ma**

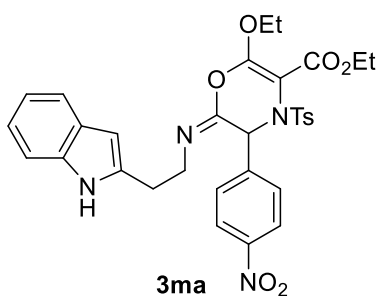

The reaction was run at 50 °C for 7 h, affording product **3ma** in 36% yield (22.7 mg) as a white solid.  $R_f = 0.3$  (PE:EA = 2:1), m.p. 143–145 °C.

$^1\text{H NMR}$  (400 MHz,  $\text{CDCl}_3$ )  $\delta$  8.47 (s, 1H), 7.93 – 7.89 (m, 2H), 7.80 (d,  $J = 8.4$  Hz, 2H), 7.58 (d,  $J = 8.4$  Hz, 1H), 7.50 – 7.48 (m, 2H), 7.38 (d,  $J = 8.0$  Hz, 1H), 7.23 – 7.13 (m, 4H), 6.29 (d,  $J = 1.6$  Hz,

1H), 5.70 (s, 1H), 4.33 – 4.25 (m, 2H), 4.06 (dq,  $J = 10.0, 7.2$  Hz, 1H), 3.91 (dq,  $J = 10.0, 7.2$  Hz, 1H), 3.73 – 3.66 (m, 1H), 3.18 – 3.01 (m, 3H), 2.39 (s, 3H), 1.36 (t,  $J = 7.2$  Hz, 3H), 1.14 (t,  $J = 7.2$  Hz, 3H).

$^{13}\text{C NMR}$  (101 MHz,  $\text{CDCl}_3$ )  $\delta$  162.9, 156.4, 148.2, 145.1, 145.0, 140.0, 137.6, 136.0, 132.9, 129.7, 128.5, 128.4, 127.4, 123.9, 121.7, 120.0, 119.9, 110.7, 100.2, 92.8, 67.4, 61.2, 57.8, 46.5, 28.7, 21.6, 14.5, 14.2.

HRMS (ESI-TOF) calcd for  $\text{C}_{32}\text{H}_{33}\text{N}_4\text{O}_8\text{S}^+$  ( $[\text{M}+\text{H}^+]$ ) = 633.2014, Found 633.1984.

### Ethyl (Z)-2-((2-(1H-indol-2-yl)ethyl)imino)-6-ethoxy-3-(4-cyanophenyl)-4-tosyl-3,4-dihydro-2H-1,4-oxazine-5-carboxylate **3na**

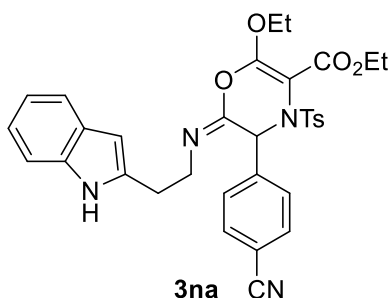

The reaction was run at 50 °C for 7 h, affording product **3na** in 35% yield (21.4 mg) as a white solid.  $R_f = 0.3$  (PE:EA = 2:1), m.p. 150–152 °C.

$^1\text{H NMR}$  (400 MHz,  $\text{CDCl}_3$ )  $\delta$  8.51 (s, 1H), 7.79 – 7.77 (m, 2H), 7.57 (dd,  $J = 8.0, 1.2$  Hz, 1H), 7.43 – 7.39 (m, 2H), 7.38 – 7.33 (m, 3H), 7.22 – 7.18 (m, 1H), 7.16 – 7.11 (m, 3H), 6.28 (d,  $J = 2.4$  Hz,

1H), 5.67 (s, 1H), 4.28 (qt,  $J = 7.2, 3.6$  Hz, 2H), 4.06 (dq,  $J = 10.0, 7.2$  Hz, 1H), 3.90 (dq,  $J = 10.0, 7.2$  Hz, 1H), 3.71 – 3.60 (m, 1H), 3.15 – 2.96 (m, 3H), 2.38 (s, 3H), 1.35 (t,  $J = 7.2$  Hz, 3H), 1.12 (t,  $J = 7.2$  Hz, 3H).

$^{13}\text{C NMR}$  (101 MHz,  $\text{CDCl}_3$ )  $\delta$  163.0, 156.4, 145.0, 145.0, 138.2, 137.6, 136.1, 132.9, 132.5, 129.7, 128.5, 128.3, 127.1, 121.6, 120.0, 119.9, 118.2, 112.7, 110.7, 100.1, 92.8, 67.3, 61.1, 57.9, 46.4, 28.7, 21.6, 14.5, 14.2.

HRMS (ESI-TOF) calcd for  $\text{C}_{33}\text{H}_{33}\text{N}_4\text{O}_6\text{S}^+$  ( $[\text{M}+\text{H}^+]$ ) = 613.2115, Found 613.2118.

### Ethyl (Z)-2-((2-(1H-indol-2-yl)ethyl)imino)-6-ethoxy-3-(naphthalen-1-yl)-4-tosyl-3,4-dihydro-



### 2H-1,4-oxazine-5-carboxylate **3oa**

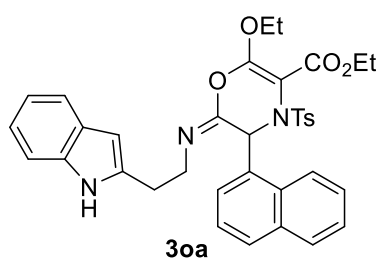

The reaction was run at 50 °C for 7 h, affording product **3oa** in 40% yield (25.5 mg) as a white solid.  $R_f = 0.3$  (PE:EA = 2:1), m.p. 113–115 °C.

$^1\text{H NMR}$  (400 MHz,  $\text{CDCl}_3$ )  $\delta$  8.83 (d,  $J = 9.2$  Hz, 1H), 8.46 (s, 1H), 7.86 (d,  $J = 8.0$  Hz, 1H), 7.81 (d,  $J = 8.0$  Hz, 1H), 7.76 – 7.74 (m, 2H), 7.71 – 7.67 (m, 1H), 7.60 – 7.54 (m, 2H), 7.26 – 7.24 (m, 1H), 7.18 – 7.09 (m, 2H), 7.07 – 7.00 (m, 3H), 6.67 (d,  $J = 7.2$  Hz, 1H), 6.49 (s, 1H), 6.26 (d,  $J = 0.8$  Hz, 1H), 4.19 (dq,  $J = 10.0, 7.2$  Hz, 1H), 4.02 (dq,  $J = 10.0, 7.2$  Hz, 1H), 3.80 – 3.71 (m, 2H), 3.70 – 3.60 (m, 1H), 3.04 – 2.94 (m, 3H), 2.39 (s, 3H), 1.27 (t,  $J = 7.2$  Hz, 3H), 0.69 (t,  $J = 7.2$  Hz, 3H).

$^{13}\text{C NMR}$  (101 MHz,  $\text{CDCl}_3$ )  $\delta$  163.0, 157.8, 146.9, 144.6, 138.1, 136.1, 134.1, 132.7, 131.3, 130.3, 129.5, 128.7, 128.5, 128.4, 128.4, 128.2, 126.8, 126.3, 125.1, 124.4, 124.3, 121.4, 119.8, 119.7, 110.8, 100.0, 92.1, 67.3, 60.1, 57.2, 46.4, 28.6, 21.6, 14.9, 13.4.

HRMS (ESI-TOF) calcd for  $\text{C}_{36}\text{H}_{36}\text{N}_3\text{O}_6\text{S}^+$  ( $[\text{M}+\text{H}^+]$ ) = 638.2319, Found 638.2325.

### Ethyl (Z)-2-((2-(1H-indol-2-yl)ethyl)imino)-6-ethoxy-3-(naphthalen-2-yl)-4-tosyl-3,4-dihydro-2H-1,4-oxazine-5-carboxylate **3pa**

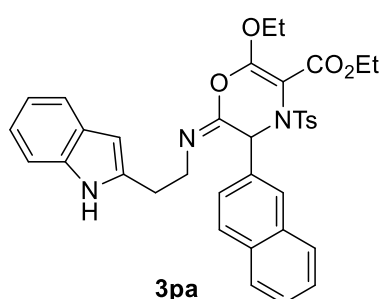

The reaction was run at 50 °C for 7 h, affording product **3pa** in 47% yield (29.9 mg) as a white solid.  $R_f = 0.3$  (PE:EA = 2:1), m.p. 115–117 °C.

$^1\text{H NMR}$  (400 MHz,  $\text{CDCl}_3$ )  $\delta$  8.74 (s, 1H), 7.85 – 7.78 (m, 4H), 7.73 (d,  $J = 8.8$  Hz, 1H), 7.61 – 7.56 (m, 3H), 7.52 – 7.44 (m, 2H), 7.38 – 7.35 (m, 1H), 7.21 – 7.08 (m, 4H), 6.32 (d,  $J = 1.2$  Hz, 1H), 5.88 (s, 1H), 4.28 (qt,  $J = 6.8, 3.6$  Hz, 2H), 4.05 (dq,  $J = 10.0, 7.0$  Hz, 1H), 3.89 (dq,  $J = 10.0, 7.2$  Hz, 1H), 3.74 – 3.67 (m, 1H), 3.18 – 2.97 (m, 3H), 2.36 (s, 3H), 1.38 (t,  $J = 7.2$  Hz, 3H), 1.09 (t,  $J = 7.2$  Hz, 3H).

$^{13}\text{C NMR}$  (101 MHz,  $\text{CDCl}_3$ )  $\delta$  163.2, 156.6, 146.0, 144.8, 138.2, 136.2, 133.3, 133.2, 133.0, 130.3, 129.6, 128.7, 128.5, 128.4, 128.2, 127.6, 126.6, 126.4, 125.5, 123.9, 121.4, 119.9, 119.7, 110.8, 100.0, 92.9, 67.1, 60.9, 58.2, 46.4, 28.7, 21.6, 14.5, 14.3.

HRMS (ESI-TOF) calcd for  $\text{C}_{36}\text{H}_{36}\text{N}_3\text{O}_6\text{S}^+$  ( $[\text{M}+\text{H}^+]$ ) = 638.2319, Found 638.2322.

### Ethyl (Z)-2-((2-(1H-indol-2-yl)ethyl)imino)-3-(benzo[b]thiophen-2-yl)-6-ethoxy-4-tosyl-3,4-

### dihydro-2H-1,4-oxazine-5-carboxylate **3qa**

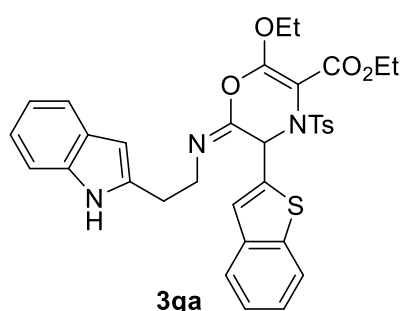

The reaction was run at 50 °C for 7 h, affording product **3qa** in 73% yield (47.1 mg) as a white solid.  $R_f = 0.2$  (PE:EA = 2:1), m.p. 81–83 °C.

$^1\text{H}$  NMR (400 MHz,  $\text{CDCl}_3$ )  $\delta$  8.75 (s, 1H), 7.90 – 7.88 (m, 2H), 7.75 – 7.70 (m, 1H), 7.59 (dd,  $J = 7.6, 1.6$  Hz, 1H), 7.54 – 7.50 (m, 1H), 7.38 – 7.36 (m, 1H), 7.35 – 7.30 (m, 2H), 7.27 (d,  $J = 1.6$  Hz,

1H), 7.21 – 7.11 (m, 4H), 6.31 (d,  $J = 1.2$  Hz, 1H), 5.92 (d,  $J = 1.6$  Hz, 1H), 4.42 – 4.28 (m, 2H), 4.10 (dq,  $J = 10.0, 7.2$  Hz, 1H), 3.95 (dq,  $J = 10.0, 7.2$  Hz, 1H), 3.71 – 3.64 (m, 1H), 3.30 – 3.23 (m, 1H), 3.13 – 3.01 (m, 2H), 2.39 (s, 3H), 1.40 (t,  $J = 7.2$  Hz, 3H), 1.17 (t,  $J = 7.2$  Hz, 3H).

$^{13}\text{C}$  NMR (101 MHz,  $\text{CDCl}_3$ )  $\delta$  163.2, 156.8, 146.0, 145.0, 139.9, 139.2, 138.1, 137.4, 136.3, 133.0, 129.7, 128.5, 128.5, 124.8, 124.5, 123.9, 123.1, 122.3, 121.4, 119.8, 119.7, 110.8, 100.0, 92.4, 67.2, 61.0, 55.9, 46.6, 28.7, 21.6, 14.6, 14.3.

HRMS (ESI-TOF) calcd for  $\text{C}_{34}\text{H}_{34}\text{N}_3\text{O}_6\text{S}_2^+$  ( $[\text{M}+\text{H}^+]$ ) = 644.1884, Found 644.1885.

### Ethyl (Z)-3-([1,1'-biphenyl]-4-yl)-6-ethoxy-2-((2-(5-fluoro-1H-indol-2-yl)ethyl)imino)-4-tosyl-3,4-dihydro-2H-1,4-oxazine-5-carboxylate **3hb**

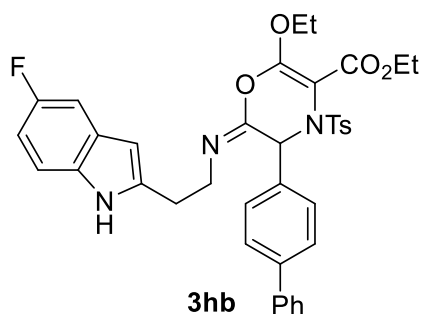

The reaction was run at 50 °C for 7 h, affording product **3hb** in 87% yield (59.2 mg) as a white solid.  $R_f = 0.3$  (PE:EA = 2:1), m.p. 141–143 °C.

$^1\text{H}$  NMR (400 MHz,  $\text{DMSO}-d_6$ )  $\delta$  11.07 (d,  $J = 2.0$  Hz, 1H), 7.70 – 7.62 (m, 2H), 7.59 – 7.53 (m, 2H), 7.47 – 7.34 (m, 5H), 7.32 – 7.22 (m, 4H), 7.13 (d,  $J = 8.0$  Hz, 2H), 6.88 (td,  $J = 9.2, 2.4$  Hz,

1H), 6.22 (d,  $J = 2.0$  Hz, 1H), 5.54 (s, 1H), 4.16 – 4.07 (m, 3H), 3.96 (dq,  $J = 10.4, 6.8$  Hz, 1H), 3.78 – 3.69 (m, 1H), 3.00 – 2.93 (m, 3H), 2.40 (s, 3H), 1.22 (t,  $J = 7.2$  Hz, 3H), 0.96 (t,  $J = 7.2$  Hz, 3H).

$^{13}\text{C}$  NMR (101 MHz,  $\text{DMSO}-d_6$ )  $\delta$  162.9, 157.5 (d,  $J = 229.0$  Hz), 156.7, 145.4, 144.1, 140.7, 140.6, 139.5, 133.2, 132.8, 132.3, 130.3, 129.6, 129.4, 129.4, 129.2, 129.1, 128.3, 128.2, 127.1, 127.0, 112.0 (d,  $J = 10.0$  Hz), 108.6 (d,  $J = 26.0$  Hz), 104.4 (d,  $J = 23.0$  Hz), 100.1 (d,  $J = 5.0$  Hz), 92.2, 67.3, 60.6, 57.7, 45.7, 28.9, 21.6, 14.6, 14.5.

$^{19}\text{F}$  NMR (376 MHz,  $\text{DMSO}-d_6$ )  $\delta$  -125.70.

HRMS (ESI-TOF) calcd for  $\text{C}_{38}\text{H}_{37}\text{FN}_3\text{O}_6\text{S}^+$  ( $[\text{M}+\text{H}^+]$ ) = 682.2382, Found 682.2382.

**Ethyl (Z)-3-([1,1'-biphenyl]-4-yl)-6-ethoxy-2-((2-(5-chloro-1H-indol-2-yl)ethyl)imino)-4-tosyl-3,4-dihydro-2H-1,4-oxazine-5-carboxylate 3hc**

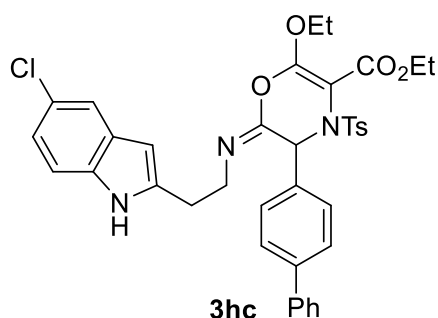

The reaction was run at 50 °C for 7 h, affording product **3hc** in 73% yield (50.9 mg) as a white solid.  $R_f = 0.3$  (PE:EA = 2:1), m.p. 131-133 °C.

$^1\text{H NMR}$  (400 MHz,  $\text{DMSO-}d_6$ )  $\delta$  11.19 (d,  $J = 2.0$  Hz, 1H), 7.68 – 7.63 (m, 2H), 7.56 – 7.53 (m, 3H), 7.49 – 7.42 (m, 4H), 7.39 – 7.31 (m, 2H), 7.23 – 7.18 (m, 2H), 7.05 (dd,  $J = 8.4, 2.0$  Hz, 3H),

6.23 (d,  $J = 2.0$  Hz, 1H), 5.52 (s, 1H), 4.17 – 4.06 (m, 3H), 3.96 (dq,  $J = 10.4, 6.8$  Hz, 1H), 3.82 – 3.72 (m, 1H), 2.99 – 2.93 (m, 3H), 2.41 (s, 3H), 1.21 (t,  $J = 7.2$  Hz, 3H), 0.95 (t,  $J = 7.2$  Hz, 3H).

$^{13}\text{C NMR}$  (101 MHz,  $\text{DMSO-}d_6$ )  $\delta$  162.9, 156.7, 145.4, 144.1, 140.5, 140.5, 139.4, 135.1, 132.8, 132.2, 130.3, 130.1, 129.4, 128.3, 128.2, 127.4, 127.2, 127.2, 127.0, 127.0, 123.9, 120.7, 119.0, 112.7, 99.8, 92.2, 67.3, 60.6, 57.7, 45.6, 28.8, 21.6, 21.2, 14.5.

HRMS (ESI-TOF) calcd for  $\text{C}_{38}\text{H}_{37}\text{ClN}_3\text{O}_6\text{S}^+$  ( $[\text{M}+\text{H}^+]$ ) = 698.2086, Found 698.2081.

**Ethyl (Z)-3-([1,1'-biphenyl]-4-yl)-6-ethoxy-2-((2-(5-bromo-1H-indol-2-yl)ethyl)imino)-4-tosyl-3,4-dihydro-2H-1,4-oxazine-5-carboxylate 3hd**

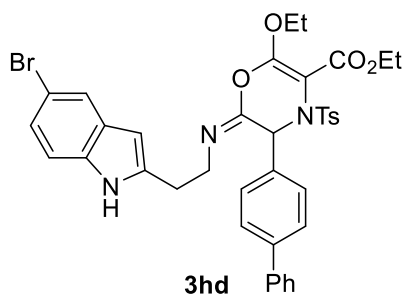

The reaction was run at 50 °C for 7 h, affording product **3hd** in 73% yield (54.2 mg) as a white solid.  $R_f = 0.2$  (PE:EA = 2:1), m.p. 160-162 °C.

$^1\text{H NMR}$  (400 MHz,  $\text{DMSO-}d_6$ )  $\delta$  11.21 (d,  $J = 2.4$  Hz, 1H), 7.70 – 7.66 (m, 3H), 7.57 – 7.54 (m, 2H), 7.50 – 7.42 (m, 4H), 7.39 – 7.33 (m, 1H), 7.28 (d,  $J = 8.8$  Hz, 1H), 7.18 – 7.15 (m, 3H), 7.04 – 7.01

(m, 2H), 6.23 (d,  $J = 2.0$  Hz, 1H), 5.51 (s, 1H), 4.18 – 4.06 (m, 3H), 3.96 (dq,  $J = 10.4, 6.8$  Hz, 1H), 3.84 – 3.73 (m, 1H), 2.99 – 2.94 (m, 3H), 2.41 (s, 3H), 1.21 (t,  $J = 7.2$  Hz, 3H), 0.95 (t,  $J = 7.2$  Hz, 3H).

$^{13}\text{C NMR}$  (101 MHz,  $\text{DMSO-}d_6$ )  $\delta$  162.9, 156.7, 145.4, 144.1, 140.4, 140.4, 139.3, 135.3, 132.8, 132.2, 130.8, 130.3, 129.5, 128.3, 128.2, 127.0, 127.0, 126.9, 123.2, 122.0, 113.2, 111.9, 99.7, 92.2, 67.3, 60.6, 57.7, 45.6, 28.8, 21.6, 21.2, 14.5.

HRMS (ESI-TOF) calcd for  $\text{C}_{38}\text{H}_{37}\text{BrN}_3\text{O}_6\text{S}^+$  ( $[\text{M}+\text{H}^+]$ ) = 742.1581, Found 742.1574.

**Ethyl (Z)-3-([1,1'-biphenyl]-4-yl)-6-ethoxy-2-((2-(5-methyl-1H-indol-2-yl)ethyl)imino)-4-tosyl-**

### 3,4-dihydro-2H-1,4-oxazine-5-carboxylate **3he**

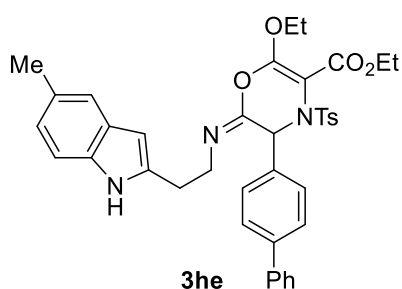

The reaction was run at 50 °C for 7 h, affording product **3he** in 90% yield (61.0 mg) as a white solid.  $R_f = 0.3$  (PE:EA = 2:1), m.p. 130–132 °C.

$^1\text{H NMR}$  (400 MHz,  $\text{DMSO-}d_6$ )  $\delta$  10.82 (d,  $J = 2.1$  Hz, 1H), 7.70 – 7.66 (m, 2H), 7.54 – 7.48 (m, 2H), 7.49 – 7.43 (m, 4H), 7.28 – 7.34 (m, 1H), 7.26 (s, 1H), 7.18 (d,  $J = 8.0$  Hz, 1H), 7.12 – 7.09

(m, 2H), 7.00 (d,  $J = 8.0$  Hz, 2H), 6.88 (dd,  $J = 8.4, 1.6$  Hz, 1H), 6.12 (d,  $J = 2.0$  Hz, 1H), 5.50 (s, 1H), 4.18 – 4.03 (m, 3H), 3.96 (dq,  $J = 10.4, 6.8$  Hz, 1H), 3.83 – 3.74 (m, 1H), 2.99 – 2.93 (m, 3H), 2.42 (s, 3H), 2.37 (s, 3H), 1.21 (t,  $J = 7.2$  Hz, 3H), 0.95 (t,  $J = 7.2$  Hz, 3H).

$^{13}\text{C NMR}$  (101 MHz,  $\text{DMSO-}d_6$ )  $\delta$  162.9, 156.8, 145.4, 143.9, 140.4, 139.5, 138.4, 135.0, 132.8, 132.2, 130.3, 129.4, 129.2, 128.3, 128.2, 127.5, 127.4, 127.2, 127.1, 127.0, 126.9, 122.3, 119.5, 111.0, 99.5, 92.2, 67.3, 60.5, 57.8, 45.8, 28.9, 21.7, 21.6, 14.6, 14.5.

HRMS (ESI-TOF) calcd for  $\text{C}_{39}\text{H}_{40}\text{N}_3\text{O}_6\text{S}^+$  ( $[\text{M}+\text{H}^+]$ ) = 678.2632, Found 678.2633.

### Ethyl (Z)-3-((1,1'-biphenyl)-4-yl)-6-ethoxy-2-((2-(6-chloro-1H-indol-2-yl)ethyl)imino)-4-tosyl-3,4-dihydro-2H-1,4-oxazine-5-carboxylate **3hf**

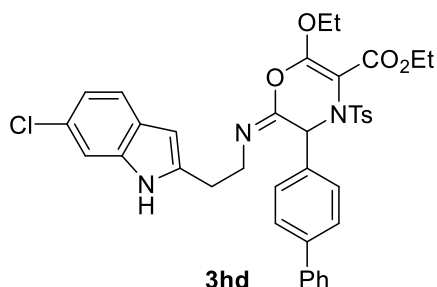

The reaction was run at 50 °C for 7 h, affording product **3hf** in 92% yield (64.2 mg) as a white solid.  $R_f = 0.3$  (PE:EA = 2:1), m.p. 142–144 °C.

$^1\text{H NMR}$  (400 MHz,  $\text{CDCl}_3$ )  $\delta$  8.81 (s, 1H), 7.87 – 7.80 (m, 2H), 7.56 – 7.53 (m, 2H), 7.48 – 7.43 (m, 3H), 7.41 – 7.32 (m, 6H), 7.16 (d,  $J = 8.4$  Hz, 2H), 7.09 (dd,  $J = 8.4, 2.0$  Hz, 1H), 6.27 (d,

$J = 1.2$  Hz, 1H), 5.70 (s, 1H), 4.37 – 4.25 (m, 2H), 4.07 (dq,  $J = 10.0, 7.2$  Hz, 1H), 3.93 (dq,  $J = 10.0, 7.2$  Hz, 1H), 3.73 – 3.65 (m, 1H), 3.24 – 3.18 (m, 1H), 3.10 – 2.97 (m, 2H), 2.38 (s, 3H), 1.37 (t,  $J = 7.2$  Hz, 3H), 1.13 (t,  $J = 7.2$  Hz, 3H).

$^{13}\text{C NMR}$  (101 MHz,  $\text{CDCl}_3$ )  $\delta$  163.3, 156.6, 146.2, 144.8, 141.5, 140.1, 139.0, 136.5, 133.3, 131.7, 129.6, 128.9, 128.4, 127.6, 127.4, 127.1, 127.1, 127.0, 126.6, 120.6, 120.4, 110.8, 100.0, 92.9, 67.2, 60.9, 57.9, 46.3, 28.6, 21.6, 14.5, 14.2.

HRMS (ESI-TOF) calcd for  $\text{C}_{38}\text{H}_{37}\text{ClN}_3\text{O}_6\text{S}^+$  ( $[\text{M}+\text{H}^+]$ ) = 698.2086, Found 698.2083.

### Ethyl (Z)-3-((1,1'-biphenyl)-4-yl)-6-ethoxy-2-((2-(7-bromo-1H-indol-2-yl)ethyl)imino)-4-tosyl-

### 3,4-dihydro-2H-1,4-oxazine-5-carboxylate **3hg**

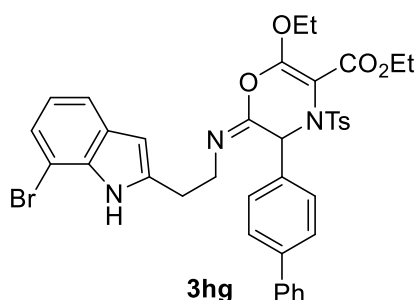

The reaction was run at 50 °C for 7 h, affording product **3hg** in 86% yield (63.7 mg) as a white solid.  $R_f = 0.3$  (PE:EA = 2:1), m.p. 158–160 °C.

$^1\text{H}$  NMR (400 MHz, DMSO- $d_6$ )  $\delta$  11.15 (d,  $J = 2.0$  Hz, 1H), 7.70 – 7.65 (m, 2H), 7.55 – 7.51 (m, 2H), 7.50 – 7.42 (m, 5H), 7.40 – 7.36 (m, 1H), 7.27 (dd,  $J = 7.6, 0.8$  Hz, 1H), 7.24 – 7.20 (m, 2H),

7.10 – 7.07 (m, 2H), 6.94 (t,  $J = 7.6$  Hz, 1H), 6.37 (d,  $J = 2.0$  Hz, 1H), 5.50 (s, 1H), 4.16 – 4.05 (m, 3H), 3.93 (dq,  $J = 10.4, 6.8$  Hz, 1H), 3.89 – 3.80 (m, 1H), 3.10 – 2.96 (m, 3H), 2.43 (s, 3H), 1.21 (t,  $J = 7.2$  Hz, 3H), 0.94 (t,  $J = 7.2$  Hz, 3H).

$^{13}\text{C}$  NMR (101 MHz, DMSO- $d_6$ )  $\delta$  162.9, 156.8, 145.4, 144.0, 140.6, 140.1, 139.5, 134.9, 132.8, 132.2, 130.6, 130.4, 129.4, 128.3, 128.2, 127.0, 127.0, 123.3, 120.7, 119.3, 104.1, 101.4, 92.1, 67.3, 60.5, 57.8, 45.8, 28.6, 21.6, 14.6, 14.5.

HRMS (ESI-TOF) calcd for  $\text{C}_{38}\text{H}_{37}\text{BrN}_3\text{O}_6\text{S}^+$  ( $[\text{M}+\text{H}^+]$ ) = 742.1581, Found 742.1571.

### Ethyl (Z)-2-(((1H-indol-2-yl)methyl)imino)-3-([1,1'-biphenyl]-4-yl)-6-ethoxy-4-tosyl-3,4-dihydro-2H-1,4-oxazine-5-carboxylate **3hh**

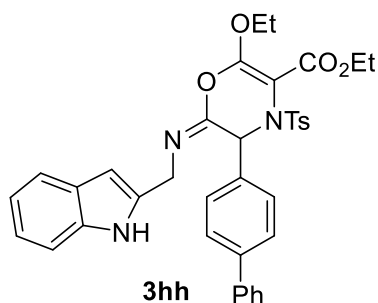

The reaction was run at 50 °C for 7 h, affording product **3hh** in 85% yield (55.2 mg) as a white solid.  $R_f = 0.3$  (PE:EA = 2:1), m.p. 93–95 °C.

$^1\text{H}$  NMR (400 MHz,  $\text{CDCl}_3$ )  $\delta$  8.83 (s, 1H), 7.89 – 7.81 (m, 2H), 7.68 – 7.53 (m, 7H), 7.52 – 7.42 (m, 3H), 7.42 – 7.35 (m, 1H), 7.26 – 7.20 (m, 1H), 7.17 (t,  $J = 7.7$  Hz, 3H), 6.34 (s, 1H), 5.85 (s, 1H), 4.65 (d,

$J = 17.2$  Hz, 1H), 4.40 – 4.28 (m, 3H), 4.25 – 4.16 (m, 1H), 4.06 (dq,  $J = 10.1, 7.0$  Hz, 1H), 2.31 (s, 3H), 1.41 (t,  $J = 7.1$  Hz, 3H), 1.21 (t,  $J = 7.1$  Hz, 3H).

$^{13}\text{C}$  NMR (101 MHz,  $\text{CDCl}_3$ )  $\delta$  163.2, 156.6, 146.0, 144.7, 138.1, 136.2, 133.3, 132.8, 129.6, 128.7, 128.7, 128.4, 128.3, 126.3, 121.4, 119.8, 119.7, 110.7, 100.0, 93.0, 67.1, 60.9, 58.1, 46.4, 28.7, 21.5, 14.4, 14.2.

HRMS (ESI-TOF) calcd for  $\text{C}_{37}\text{H}_{36}\text{N}_3\text{O}_6\text{S}^+$  ( $[\text{M}+\text{H}^+]$ ) = 650.2319, Found 650.2325.

### Ethyl (Z)-2-(((2-(1H-indol-2-yl)ethyl)imino)-6-ethoxy-3-phenyl-4-tosyl-3,4-dihydro-2H-1,4-oxazine-5-carboxylate **3ai**

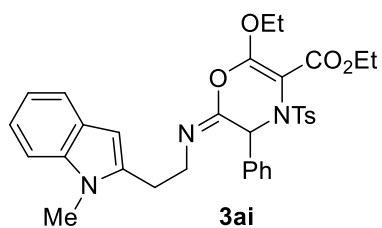

The reaction was run at 50 °C for 7 h, affording product **3ai** in 15% yield (12.6mg) as a white solid.  $R_f = 0.3$  (PE:EA = 2:1), m.p.129-130 °C.

$^1\text{H NMR}$  (600 MHz,  $\text{DMSO-}d_6$ )  $\delta$  7.70 – 7.65 (m, 2H), 7.46 (dd,  $J = 7.9, 2.9$  Hz, 3H), 7.40 (d,  $J = 8.3$  Hz, 1H), 7.28 – 7.23 (m, 3H), 7.15 (t,  $J = 7.5$  Hz, 2H), 7.10 (t,  $J = 7.7$  Hz, 1H), 7.00 (t,  $J = 7.4$  Hz, 1H), 6.23 (s, 1H), 5.51 (s, 1H), 4.15 – 4.03 (m, 3H), 3.96 – 3.88 (m, 1H), 3.69 (s, 3H), 3.64 – 3.60 (m, 3H), 3.03 – 2.90 (m, 3H), 2.39 (s, 3H), 1.22 – 1.18 (m, 3H), 0.98 – 0.92 (m, 3H).

$^{13}\text{C NMR}$  (151 MHz,  $\text{DMSO-}d_6$ )  $\delta$  162.9, 156.7, 145.4, 144.2, 139.4, 137.5, 133.3, 132.9, 130.4, 129.1, 129.1, 128.3, 127.8, 126.5, 120.8, 119.8, 119.4, 109.9, 99.6, 92.3, 67.3, 60.6, 57.9, 45.6, 30.0, 27.2, 21.6, 14.6, 14.5.

HRMS (ESI-TOF) calcd for  $\text{C}_{33}\text{H}_{36}\text{N}_3\text{O}_6\text{S}^+$  ( $[\text{M}+\text{H}^+]$ ) = 602.2319, Found 602.2316.

## 5. Experimental procedure for the scale-up reaction and transformations of the product

### a) Scale-up version of the reaction

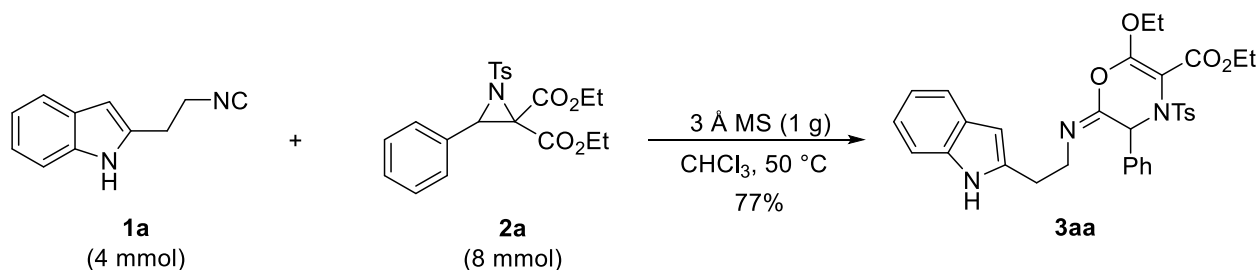

**Procedure:** A dry reaction tube was charged with **1a** (4 mmol, 0.68 g, 1 equiv.), **2a** (8 mmol, 3.33 g, 2 equiv.) and 3 Å MS (1.00 g).  $\text{CHCl}_3$  (20 mL, 0.25 M) was added. The reaction mixture was stirred at 50 °C for 7 h. The residue was directly purified by flash chromatography on silica gel using petroleum ether/ethyl acetate= 2/1 as eluent to afford the desired product **3aa** in 77% yield (1.82 g).

### b) Transformation of the product **3aa**

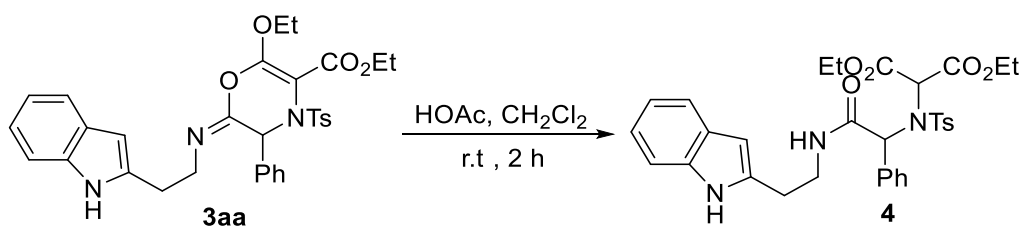

**Procedure:** A dry round-bottom flask was charged with **3aa** (0.1 mmol, 58.7 mg),  $\text{AcOH}$  (1 mL) and  $\text{CH}_2\text{Cl}_2$  (1 mL). The reaction mixture was stirred at room temperature for 2 h. The precipitate was filtered out and the solvent was removed under reduced pressure. Saturated aqueous  $\text{Na}_2\text{CO}_3$  was added to the mixture to adjust the pH of solution to 8.0-9.0. Then the solution was diluted with ethyl acetate, washed with water, dried with  $\text{Na}_2\text{SO}_4$ , and concentrated under reduced pressure. The residue was directly purified by flash chromatography on silica gel using petroleum ether/ethyl acetate = 2/1 as eluent to afford the desired product **4** in 58% yield.

### Diethyl 2-((N-(2-((2-(1H-indol-2-yl)ethyl)amino)-2-oxo-1-phenylethyl)-4-methylphenyl)sulfonamido)malonate **4**

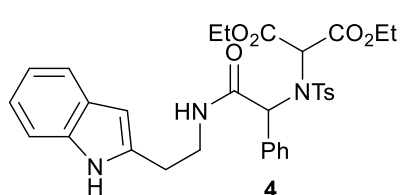

The reaction was run at room temperature for 2 h, affording product **4** in 58% yield (34.1 mg) as a white solid.  $R_f = 0.1$  (PE:EA = 2:1), m.p. 62-64 °C.

$^1\text{H NMR}$  (400 MHz,  $\text{CDCl}_3$ )  $\delta$  9.08 (s, 1H), 8.28 – 8.25 (m, 1H), 8.05 – 8.02 (m, 2H), 7.54 (d,  $J = 6.8$  Hz, 1H), 7.33 (dd,  $J = 8.0, 3.6$  Hz, 3H), 7.20 – 7.05 (m, 3H),

7.00 (t,  $J = 8.0$  Hz, 2H), 6.71 (d,  $J = 7.2$  Hz, 2H), 6.24 (d,  $J = 2.0$  Hz, 1H), 5.37 (s, 1H), 4.50 (s, 1H), 4.33 (dq,  $J = 10.8, 7.2$  Hz, 1H), 4.22 (dq,  $J = 10.8, 7.2$  Hz, 1H), 3.95 (dq,  $J = 10.8, 7.2$  Hz, 1H), 3.86 – 3.74 (m, 2H), 3.39 (dt,  $J = 13.6, 5.6$  Hz, 1H), 3.04 – 2.96 (m, 2H), 2.45 (s, 3H), 1.29 (t,  $J = 7.2$  Hz, 3H), 1.07 (t,  $J = 7.2$  Hz, 3H).

$^{13}\text{C}$  NMR (101 MHz,  $\text{CDCl}_3$ )  $\delta$  168.4, 168.1, 165.4, 144.7, 136.7, 136.6, 135.8, 133.5, 129.7, 129.4, 129.2, 128.6, 128.6, 128.5, 121.2, 119.7, 119.5, 111.1, 100.5, 64.2, 63.5, 62.5, 61.8, 39.4, 28.4, 21.6, 13.8, 13.8.

HRMS (ESI-TOF) calcd for  $\text{C}_{32}\text{H}_{36}\text{N}_3\text{O}_7\text{S}^+$  ( $[\text{M}+\text{H}^+]$ ) = 606.2268, Found 606.2282.

b) Transformation of the product **3aa**

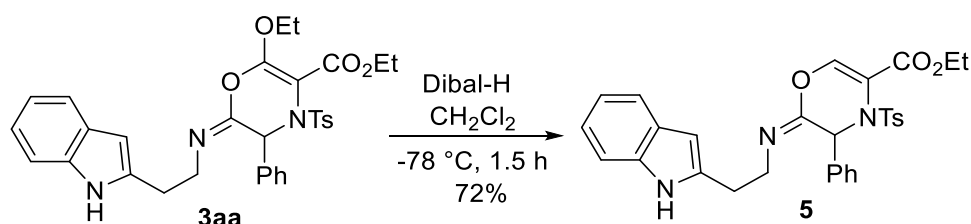

**Procedure:** Under an inert nitrogen atmosphere, to a solution of **3aa** (58.7 mg, 0.1 mmol) in anhydrous DCM (0.5 mL) was added dropwise Dibal-H (1M in hexane, 0.4 mL, 4 eq.) at over 2 min at  $-78$  °C. After 1.5 h, the reaction mixture was quenched with methanol. NaOH (aq.) was added to dilute the reaction mixture. The resulting slurry allowed to warm to room temperature and continued to stir for 30 minutes. The layers were separated and the aqueous layer with washed with DCM. The combined organic phase was dried over  $\text{MgSO}_4$ . The residue was directly purified by flash chromatography on silica gel using petroleum ether/ethyl acetate = 3/1 as eluent to afford the desired product **5** in 72% yield.

**Ethyl (Z)-2-((2-(1H-indol-2-yl)ethyl)imino)-3-phenyl-4-tosyl-3,4-dihydro-2H-1,4-oxazine-5-carboxylate 5**

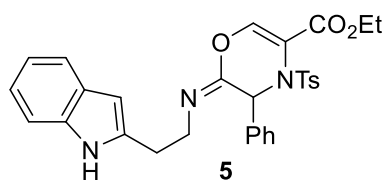

The reaction was run at  $-78$  °C for 1.5 h, affording product **5** in 72% yield (39.3 mg) as a white solid.  $R_f = 0.4$  (PE:EA = 3:1), m.p. 68–70 °C.

$^1\text{H}$  NMR (600 MHz,  $\text{CDCl}_3$ )  $\delta$  8.73 (s, 1H), 7.91 – 7.81 (m, 2H), 7.58 (dt,  $J = 7.8, 1.0$  Hz, 1H), 7.44 – 7.36 (m, 1H), 7.31 (dt,  $J = 8.5, 1.2$  Hz, 2H), 7.28 – 7.25 (m, 1H), 7.24 – 7.19 (m, 3H), 7.19 – 7.13 (m, 3H), 7.13 – 7.09 (m, 1H), 6.29 (dd,  $J = 2.1, 0.9$  Hz, 1H), 5.67 (d,  $J =$



1.0 Hz, 1H), 4.36 (dq,  $J = 10.7, 7.1$  Hz, 1H), 4.30 (dq,  $J = 10.7, 7.1$  Hz, 1H), 3.72 – 3.68 (m, 1H), 3.25 – 3.21 (m, 1H), 3.06 – 3.00 (m, 1H), 2.98 – 2.94 (m, 1H), 2.34 (s, 3H), 1.37 (t,  $J = 7.1$  Hz, 3H).  
 $^{13}\text{C}$  NMR (151 MHz,  $\text{CDCl}_3$ )  $\delta$  163.0, 146.0, 145.0, 143.5, 138.3, 136.2, 133.7, 132.7, 130.0, 128.8, 128.7, 128.4, 128.3, 126.0, 121.2, 119.8, 119.6, 113.7, 110.8, 100.0, 61.7, 58.1, 46.4, 28.7, 21.5, 14.1.  
HRMS (ESI-TOF) calcd for  $\text{C}_{30}\text{H}_{30}\text{N}_3\text{O}_6\text{S}^+$  ( $[\text{M}+\text{H}^+]$ ) = 544.1901, Found:544.1899

## 6. X-ray crystallographic data of **3aa** and **3aa'**.

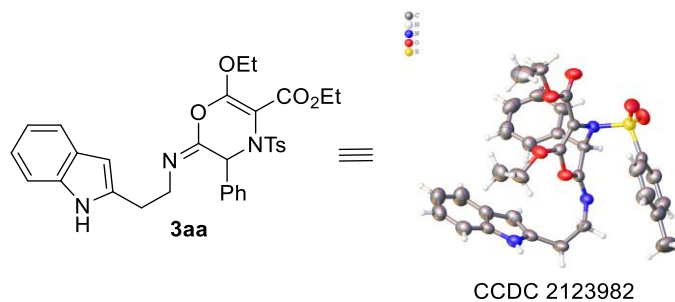

The single crystal for compound **3aa** was obtained by vaporization of a mixture solvent of cyclohexane and methanol (v/v = 1:3). The data were collected on a Xcalibur Eos diffractometer equipped with MoK $\alpha$  X-ray sources ( $\lambda = 0.71073$  Å).

X-ray derived ORTEP of **3aa** with thermal ellipsoids shown at the 30% probability level.

Structure deposited at the Cambridge Crystallographic Data Centre. CCDC 2123982 contains the supplementary crystallographic data which can be obtained free of charge from the Cambridge Crystallographic Data Center via <https://www.ccdc.cam.ac.uk/structures/>.

Crystal data and structure refinement for CCDC 2123982

|                                        |                                                                 |
|----------------------------------------|-----------------------------------------------------------------|
| Empirical formula                      | C <sub>32</sub> H <sub>33</sub> N <sub>3</sub> O <sub>6</sub> S |
| Formula weight                         | 587.67                                                          |
| Temperature/K                          | 293.15                                                          |
| Crystal system                         | triclinic                                                       |
| Space group                            | P-1                                                             |
| a/Å                                    | 9.8721(6)                                                       |
| b/Å                                    | 10.9778(7)                                                      |
| c/Å                                    | 15.0003(10)                                                     |
| $\alpha$ /°                            | 111.083(6)                                                      |
| $\beta$ /°                             | 96.959(5)                                                       |
| $\gamma$ /°                            | 94.009(5)                                                       |
| Volume/Å <sup>3</sup>                  | 1494.30(18)                                                     |
| Z                                      | 2                                                               |
| $\rho_{\text{calc}}/\text{cm}^3$       | 1.306                                                           |
| $\mu/\text{mm}^{-1}$                   | 0.157                                                           |
| F(000)                                 | 620.0                                                           |
| Crystal size/mm <sup>3</sup>           | 0.35 × 0.3 × 0.25                                               |
| Radiation                              | MoK $\alpha$ ( $\lambda = 0.71073$ )                            |
| 2 $\theta$ range for data collection/° | 5.894 to 52.744                                                 |
| Index ranges                           | -12 ≤ h ≤ 12, -10 ≤ k ≤ 13, -18 ≤ l ≤ 13                        |
| Reflections collected                  | 12221                                                           |

|                                                |                                       |
|------------------------------------------------|---------------------------------------|
| Independent reflections                        | 6101 [Rint = 0.0197, Rsigma = 0.0388] |
| Data/restraints/parameters                     | 6101/0/382                            |
| Goodness-of-fit on F2                          | 1.034                                 |
| Final R indexes [ $I \geq 2\sigma(I)$ ]        | $R^1 = 0.0462$ , $wR^2 = 0.1049$      |
| Final R indexes [all data]                     | $R^1 = 0.0697$ , $wR^2 = 0.1177$      |
| Largest diff. peak/hole / $e \text{ \AA}^{-3}$ | 0.26/-0.30                            |

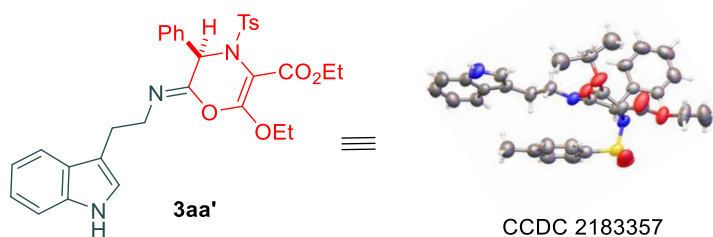

The single crystal for compound **3aa'** was obtained by vaporization of a mixture solvent of cyclohexane and methanol (v/v = 1:3). The data were collected on a Xcalibur Eos diffractometer equipped with MoK $\alpha$  X-ray sources ( $\lambda = 0.71073 \text{ \AA}$ ).

X-ray derived ORTEP of **3aa'** with thermal ellipsoids shown at the 30% probability level.

Structure deposited at the Cambridge Crystallographic Data Centre. CCDC 2123982 contains the supplementary crystallographic data which can be obtained free of charge from the Cambridge Crystallographic Data Center via <https://www.ccdc.cam.ac.uk/structures/>.

Crystal data and structure refinement for CCDC 2183357

|                                  |                       |
|----------------------------------|-----------------------|
| Empirical formula                | $C_{32}H_{33}N_3O_6S$ |
| Formula weight                   | 587.67                |
| Temperature/K                    | 293.15                |
| Crystal system                   | monoclinic            |
| Space group                      | P21/n                 |
| a/ $\text{\AA}$                  | 8.2530(7)             |
| b/ $\text{\AA}$                  | 28.894(2)             |
| c/ $\text{\AA}$                  | 13.2728(14)           |
| $\alpha/^\circ$                  | 90                    |
| $\beta/^\circ$                   | 107.124(9)            |
| $\gamma/^\circ$                  | 90                    |
| Volume/ $\text{\AA}^3$           | 3024.7(5)             |
| Z                                | 4                     |
| $\rho_{\text{calc}}/\text{cm}^3$ | 1.290                 |
| $\mu/\text{mm}^{-1}$             | 0.155                 |
| F(000)                           | 1240.0                |

|                                                  |                                                                        |
|--------------------------------------------------|------------------------------------------------------------------------|
| Crystal size/mm <sup>3</sup>                     | 0.35 × 0.3 × 0.25                                                      |
| Radiation                                        | MoK $\alpha$ ( $\lambda = 0.71073$ )                                   |
| 2 $\Theta$ range for data collection/ $^{\circ}$ | 5.932 to 52.744                                                        |
| Index ranges                                     | -10 $\leq$ h $\leq$ 10, -36 $\leq$ k $\leq$ 34, -16 $\leq$ l $\leq$ 15 |
| Reflections collected                            | 15399                                                                  |
| Independent reflections                          | 6177 [R <sub>int</sub> = 0.0637, R <sub>sigma</sub> = 0.0815]          |
| Data/restraints/parameters                       | 6177/0/387                                                             |
| Goodness-of-fit on F <sup>2</sup>                | 1.061                                                                  |
| Final R indexes [ $I \geq 2\sigma(I)$ ]          | R <sub>1</sub> = 0.0789, wR <sub>2</sub> = 0.1816                      |
| Final R indexes [all data]                       | R <sub>1</sub> = 0.1383, wR <sub>2</sub> = 0.2242                      |
| Largest diff. peak/hole/e $\text{\AA}^{-3}$      | 0.31/-0.39                                                             |

## 7. Quantum chemical calculations

The electron correlation effects are considered by employing density functional theory (DFT)<sup>3</sup> at the M06-2X-D3 level<sup>4</sup>, which include the London-dispersion correction<sup>5</sup>. The ultrafine grid (99,590), having 99 radial shells and 590 angular points per shell, is used to evaluate the numerical integration accuracy. Geometry optimizations are performed with the double-zeta basis set 6-31G(d,p) in chloroform medium (298.15 K) while using SMD solvation model<sup>6</sup>. Based on the optimized structures, the electronic energy ( $E_{\text{electron}}$ ) and solvation free energy ( $\Delta G_{\text{solv}}$ ) are calculated at the same theoretical level. The harmonic vibrational frequencies are analyzed after the geometry optimizations to characterize the nature of the stationary point as a minimum with all positive frequencies or as a transition state with only one imaginary frequency, and to provide the zero-point energy ( $E_{\text{ZPE}}$ ), total entropy ( $S_{\text{tot}}$ ) and thermal correction to enthalpy ( $H_{\text{corr}}$ ) at the same theoretical level. Then, the intrinsic reaction coordinate (IRC)<sup>[5]</sup> calculations are carried out to verify the transition state (TS) associated with the correct reactant complexes (RC), intermediate (IM) and product complexes (PC) at the same level of theory. The Gibbs free energy of free substrates ( $G_i$ ) are defined as reference-point. All calculations were carried out with Gaussian 16 program.<sup>7</sup>

$$G = E_{\text{electron}} + \Delta G_{\text{solv}} + E_{\text{ZPE}} + H_{\text{corr}} - TS_{\text{tot}} \quad (1)$$

$$\Delta G = G - \sum_i G_i \quad (2)$$

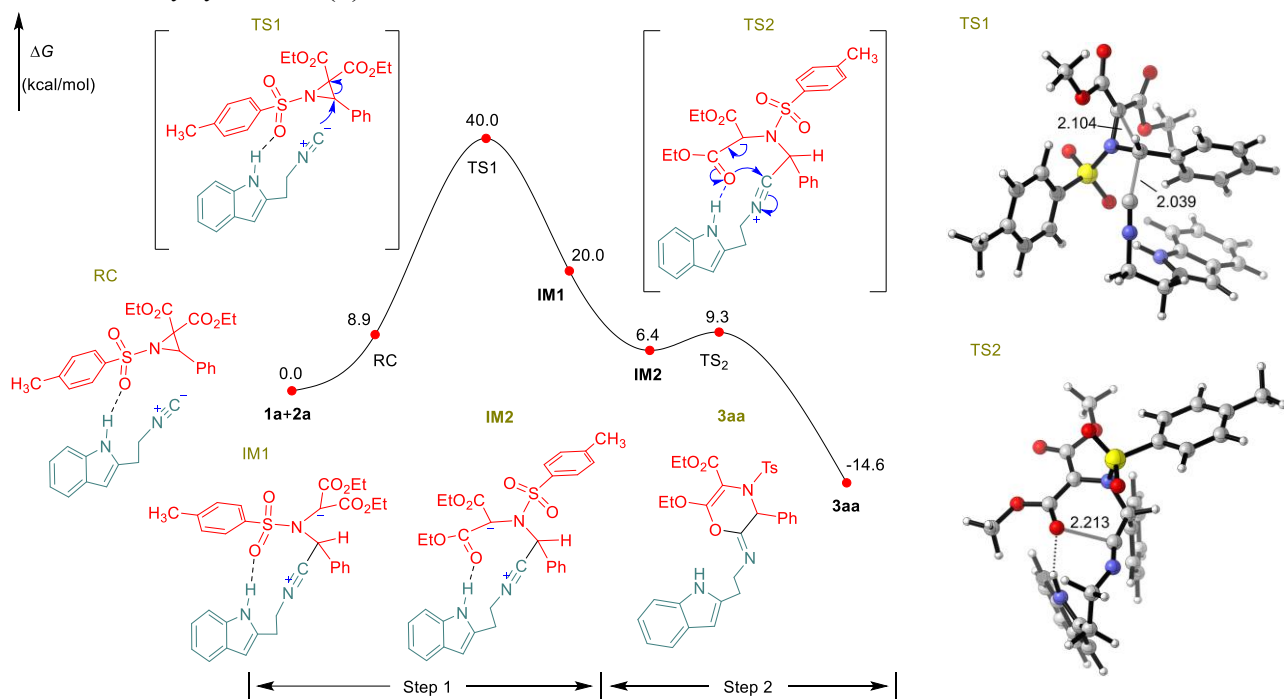

**Figure 1.** Relative energy profiles (in kcal/mol) of reaction pathway and optimized structures of important transition state (bond lengths, Å) at the M06-2X-D3/6-31G(d,p)/SMD(CHCl<sub>3</sub>) level.

## Cartesian coordinate for theoretical calculation

### 1a

|   |             |             |             |
|---|-------------|-------------|-------------|
| C | -1.33826900 | 0.69051000  | 0.00010500  |
| C | -1.51048000 | -0.71603400 | 0.00004600  |
| C | -2.77371600 | -1.31601500 | -0.00016700 |
| C | -3.87668900 | -0.47739200 | -0.00031400 |
| C | -3.73039000 | 0.92425900  | -0.00025400 |
| C | -2.47695200 | 1.51310100  | -0.00005000 |
| C | 0.07761700  | 0.93484900  | 0.00033900  |
| H | -2.88323300 | -2.39602000 | -0.00021300 |
| H | -4.87292500 | -0.90844600 | -0.00047700 |
| H | -4.61793200 | 1.54919100  | -0.00036700 |
| H | -2.37254400 | 2.59422100  | 0.00000100  |
| N | -0.25669900 | -1.27990900 | 0.00021700  |
| C | 0.69876000  | -0.28707800 | 0.00035300  |
| H | 0.56559800  | 1.89942400  | 0.00043400  |
| C | 2.15094900  | -0.64657800 | 0.00056900  |
| H | 2.38917900  | -1.25192800 | 0.88258100  |
| H | 2.38908200  | -1.25326200 | -0.88055200 |
| H | -0.05908200 | -2.27035400 | 0.00017000  |
| C | 3.02892500  | 0.60233100  | -0.00041800 |
| H | 2.83600000  | 1.21267300  | 0.88582100  |
| H | 2.83585100  | 1.21137300  | -0.88751800 |
| C | 5.53611600  | -0.07484700 | -0.00014200 |
| N | 4.41024100  | 0.24140900  | -0.00025700 |

### 2a

|   |             |             |             |
|---|-------------|-------------|-------------|
| C | 1.30682000  | 0.05012900  | -0.94100500 |
| C | 1.52409900  | -0.72080200 | 0.34640100  |
| H | 1.44399300  | -0.55183500 | -1.83772100 |
| C | 2.10410800  | 0.01231800  | 1.53412100  |
| O | 3.29428600  | 0.09575600  | 1.70429700  |
| O | 1.17848900  | 0.55819800  | 2.31355500  |
| C | 1.93891300  | -2.17570600 | 0.29355900  |
| O | 2.38294600  | -2.76564400 | 1.24453600  |
| O | 1.72289200  | -2.70087700 | -0.90712500 |
| C | 1.69406800  | 1.34353700  | 3.39755000  |
| H | 2.29518900  | 2.16802000  | 3.00779800  |
| H | 0.82227500  | 1.72190700  | 3.92778400  |
| H | 2.30522900  | 0.72361100  | 4.05593200  |
| C | 1.82659600  | -4.12902600 | -0.98181100 |
| H | 1.13784700  | -4.58351000 | -0.26698900 |
| H | 1.54787600  | -4.38925900 | -2.00095700 |
| H | 2.84936700  | -4.44400100 | -0.76800300 |
| C | 1.65671100  | 1.49660800  | -1.04329600 |
| C | 1.01670900  | 2.45814300  | -0.25766500 |
| C | 2.66895300  | 1.88058300  | -1.92487900 |
| C | 1.39704200  | 3.79417600  | -0.35161700 |
| H | 0.22043200  | 2.15334600  | 0.41480700  |
| C | 3.04598300  | 3.21698100  | -2.01507800 |
| H | 3.16060000  | 1.13019200  | -2.53795500 |
| C | 2.41185700  | 4.17544100  | -1.22707000 |
| H | 0.89463400  | 4.53994500  | 0.25640500  |
| H | 3.83356200  | 3.50969900  | -2.70195700 |
| H | 2.70501500  | 5.21805300  | -1.29869200 |
| N | 0.20058700  | -0.31692200 | -0.08408700 |
| S | -0.97506000 | -1.45636800 | -0.56101300 |
| O | -0.88371200 | -1.70844200 | -1.99228800 |
| O | -0.87713900 | -2.55498800 | 0.39399800  |
| C | -2.44334200 | -0.52495000 | -0.24067900 |
| C | -3.31602300 | -0.25703000 | -1.28601600 |
| C | -2.70077000 | -0.10459400 | 1.06481600  |
| C | -4.48263800 | 0.45381500  | -1.01213600 |

|           |             |             |             |
|-----------|-------------|-------------|-------------|
| H         | -3.08439400 | -0.59574500 | -2.29003700 |
| C         | -3.86537800 | 0.60373100  | 1.31343700  |
| H         | -1.99566500 | -0.32130800 | 1.86197600  |
| C         | -4.77204300 | 0.89053500  | 0.28133900  |
| H         | -5.17623900 | 0.67244700  | -1.81843800 |
| H         | -4.08149900 | 0.94313000  | 2.32254400  |
| C         | -6.03472400 | 1.65157600  | 0.58061900  |
| H         | -6.68620700 | 1.07079900  | 1.24129900  |
| H         | -5.81010200 | 2.59310800  | 1.09033500  |
| H         | -6.58880100 | 1.87692300  | -0.33265800 |
| <b>RC</b> |             |             |             |
| C         | 1.28277700  | -1.22663200 | 1.29110400  |
| C         | 1.61465800  | -2.23922500 | 0.17249400  |
| H         | 2.08329700  | -1.06828900 | 2.01184800  |
| C         | 0.46206600  | -3.09618400 | -0.30817100 |
| O         | 0.14757800  | -4.12302100 | 0.23483000  |
| O         | -0.14599800 | -2.56653500 | -1.36482700 |
| C         | 2.94456100  | -2.95970800 | 0.18666300  |
| O         | 3.08398200  | -4.11862800 | -0.11184100 |
| O         | 3.93088500  | -2.15189000 | 0.57409400  |
| C         | -1.31839700 | -3.26370100 | -1.81102900 |
| H         | -2.10211200 | -3.19629800 | -1.05169900 |
| H         | -1.62864200 | -2.76370600 | -2.72597500 |
| H         | -1.08021500 | -4.31076200 | -2.00462500 |
| C         | 5.22909600  | -2.76052100 | 0.62101500  |
| H         | 5.51492600  | -3.11186600 | -0.37212000 |
| H         | 5.90730900  | -1.98015800 | 0.96083700  |
| H         | 5.22772200  | -3.59941600 | 1.31947200  |
| C         | -0.08499800 | -1.16042900 | 1.88732800  |
| C         | -1.26304500 | -1.07906800 | 1.14094100  |
| C         | -0.15943200 | -1.19895100 | 3.28296900  |
| C         | -2.49686800 | -1.05703000 | 1.78615500  |
| H         | -1.22569000 | -1.00316100 | 0.05884100  |
| C         | -1.39303700 | -1.17371600 | 3.92509100  |
| H         | 0.75608300  | -1.24426900 | 3.86636600  |
| C         | -2.56693700 | -1.10733700 | 3.17665600  |
| H         | -3.40461900 | -0.98238500 | 1.19306100  |
| H         | -1.43625100 | -1.20371100 | 5.00916400  |
| H         | -3.53177000 | -1.08614200 | 3.67364200  |
| N         | 1.65893600  | -0.83330900 | -0.03090600 |
| S         | 1.26922400  | 0.16165300  | -1.29383900 |
| O         | 1.72333100  | -0.55008700 | -2.47857300 |
| O         | -0.11108500 | 0.64398100  | -1.25393600 |
| C         | 2.32447600  | 1.54514400  | -0.96625800 |
| C         | 1.83211600  | 2.82402800  | -1.19593900 |
| C         | 3.63703500  | 1.32512700  | -0.55380900 |
| C         | 2.68053000  | 3.90981100  | -1.00199500 |
| H         | 0.80111800  | 2.96499600  | -1.50349000 |
| C         | 4.46464800  | 2.42230300  | -0.36309800 |
| H         | 3.98663200  | 0.31396100  | -0.36493900 |
| C         | 4.00072500  | 3.72617300  | -0.58407100 |
| H         | 2.30852100  | 4.91583100  | -1.17178000 |
| H         | 5.48793100  | 2.27022400  | -0.03105800 |
| C         | 4.91811800  | 4.89898700  | -0.36740300 |
| H         | 5.78239000  | 4.84261000  | -1.03643800 |
| H         | 4.40464300  | 5.84484400  | -0.55129000 |
| H         | 5.30007900  | 4.90847400  | 0.65791800  |
| C         | -4.78302000 | 0.82122600  | -0.61869300 |
| C         | -3.43471000 | 0.70047000  | -1.04403800 |
| C         | -3.06755700 | -0.04855600 | -2.16956200 |
| C         | -4.08322400 | -0.67676500 | -2.87278400 |
| C         | -5.43124000 | -0.56253300 | -2.47527200 |
| C         | -5.78881900 | 0.17822700  | -1.36167900 |

|   |             |             |             |
|---|-------------|-------------|-------------|
| C | -4.76685500 | 1.62712800  | 0.56814000  |
| H | -2.02698300 | -0.12718600 | -2.46779300 |
| H | -3.83633900 | -1.26590800 | -3.75098000 |
| H | -6.19877900 | -1.06731700 | -3.05373400 |
| H | -6.82942000 | 0.25802000  | -1.06050800 |
| N | -2.65763500 | 1.41277300  | -0.16086900 |
| C | -3.45769500 | 1.94990100  | 0.82200100  |
| H | -5.61567700 | 1.93064400  | 1.16507400  |
| C | -2.89462000 | 2.70049600  | 1.99045600  |
| H | -3.65308000 | 3.40227700  | 2.34666200  |
| H | -2.68205300 | 2.00782300  | 2.81414300  |
| H | -1.64402500 | 1.40211000  | -0.17371500 |
| C | -1.61740700 | 3.49080600  | 1.69419300  |
| H | -1.42951300 | 4.21253900  | 2.49200200  |
| H | -1.69419300 | 4.03370200  | 0.74800700  |
| C | 0.45754900  | 1.92161900  | 1.62782900  |
| N | -0.47578400 | 2.62896000  | 1.62479700  |

**TS1**

|   |             |             |             |
|---|-------------|-------------|-------------|
| C | 0.74700800  | -0.99003000 | 1.17118000  |
| C | 1.53134600  | -2.41125100 | -0.16697600 |
| H | 1.47803500  | -1.14850000 | 1.96197300  |
| C | 0.53628800  | -3.27354900 | -0.78975100 |
| O | 0.50868700  | -4.48779900 | -0.77516900 |
| O | -0.41093000 | -2.53953300 | -1.42440000 |
| C | 2.79347300  | -2.94862600 | 0.30898400  |
| O | 3.14869300  | -4.10917000 | 0.29411700  |
| O | 3.58153800  | -1.97272700 | 0.85351300  |
| C | -1.52329300 | -3.27776400 | -1.91736800 |
| H | -1.96952000 | -3.88339100 | -1.12445700 |
| H | -2.24082900 | -2.53663300 | -2.27192000 |
| H | -1.21962200 | -3.93117500 | -2.73896500 |
| C | 4.83132200  | -2.43412900 | 1.36032700  |
| H | 5.42428200  | -2.89748700 | 0.56861300  |
| H | 5.34241700  | -1.55092500 | 1.74473900  |
| H | 4.68163800  | -3.16086100 | 2.16232100  |
| C | -0.65157000 | -1.35127700 | 1.49587800  |
| C | -1.71601100 | -1.10371300 | 0.62277400  |
| C | -0.89273400 | -1.90938600 | 2.75629100  |
| C | -3.01033800 | -1.44296900 | 1.00090500  |
| H | -1.52142500 | -0.65823300 | -0.34507500 |
| C | -2.18842200 | -2.24605700 | 3.12986400  |
| H | -0.06093500 | -2.08996600 | 3.43176700  |
| C | -3.24639800 | -2.01524600 | 2.25103900  |
| H | -3.83347000 | -1.25186400 | 0.31755200  |
| H | -2.37255100 | -2.69109400 | 4.10212100  |
| H | -4.25842200 | -2.27855700 | 2.54234700  |
| N | 1.31525000  | -1.01618100 | -0.10623200 |
| S | 1.26387600  | 0.04678600  | -1.39090400 |
| O | 1.79924500  | -0.70288800 | -2.51322200 |
| O | -0.06266300 | 0.66665500  | -1.49502200 |
| C | 2.37631300  | 1.35691800  | -0.93883400 |
| C | 2.03442500  | 2.66409500  | -1.27254000 |
| C | 3.57728400  | 1.05453600  | -0.30160100 |
| C | 2.91606900  | 3.69031100  | -0.94685000 |
| H | 1.09552600  | 2.87274800  | -1.77587900 |
| C | 4.44211200  | 2.09442300  | 0.01434700  |
| H | 3.80796900  | 0.02584100  | -0.03939100 |
| C | 4.12708100  | 3.42203900  | -0.30173400 |
| H | 2.66100300  | 4.71538700  | -1.20022400 |
| H | 5.37862800  | 1.87494700  | 0.51990400  |
| C | 5.08807500  | 4.52972900  | 0.03417000  |
| H | 5.95843400  | 4.49429700  | -0.62923200 |
| H | 4.62000000  | 5.50995200  | -0.07709800 |



|   |             |             |             |
|---|-------------|-------------|-------------|
| H | 5.45585800  | 4.43355800  | 1.05942300  |
| C | -4.46687600 | 1.56927300  | 0.00599300  |
| C | -3.32172000 | 1.37921600  | -0.80552800 |
| C | -3.33787400 | 0.59159300  | -1.96248800 |
| C | -4.54052500 | -0.00610400 | -2.30444700 |
| C | -5.69877200 | 0.17724900  | -1.51904900 |
| C | -5.67405600 | 0.95643400  | -0.37449800 |
| C | -4.05184300 | 2.37418000  | 1.11790300  |
| H | -2.43715200 | 0.45042900  | -2.55249900 |
| H | -4.59327500 | -0.62520900 | -3.19470600 |
| H | -6.62351300 | -0.30491600 | -1.82048500 |
| H | -6.56941600 | 1.08562600  | 0.22669500  |
| N | -2.27740500 | 2.04983300  | -0.21429200 |
| C | -2.71656200 | 2.63789500  | 0.95331700  |
| H | -4.66306900 | 2.71931900  | 1.94015300  |
| C | -1.82095100 | 3.46139700  | 1.83576600  |
| H | -2.11990900 | 4.51389500  | 1.79057700  |
| H | -1.94064000 | 3.14069200  | 2.87443700  |
| H | -1.32022400 | 1.96432700  | -0.53696200 |
| C | -0.34173000 | 3.42385900  | 1.46610300  |
| H | 0.24324500  | 4.04589600  | 2.14565900  |
| H | -0.17041500 | 3.77428800  | 0.44320800  |
| C | 0.60892600  | 1.01341500  | 1.52688700  |
| N | 0.18622400  | 2.09262900  | 1.53637700  |

### IM1

|   |             |             |             |
|---|-------------|-------------|-------------|
| C | 0.58275000  | 0.66267100  | -1.15290400 |
| C | 1.42899900  | 2.42000400  | 0.32654200  |
| H | 1.29317300  | 0.96866100  | -1.93528100 |
| C | 0.44902800  | 3.19949000  | 1.03244200  |
| O | 0.42805700  | 4.40756900  | 1.20551600  |
| O | -0.54222800 | 2.40296900  | 1.54625400  |
| C | 2.54290600  | 3.02142500  | -0.33257500 |
| O | 2.90612200  | 4.18585700  | -0.32075800 |
| O | 3.23431400  | 2.09640400  | -1.10821600 |
| C | -1.62746100 | 3.10007700  | 2.13269600  |
| H | -2.08729300 | 3.78828800  | 1.41704700  |
| H | -2.35021400 | 2.33796900  | 2.43010200  |
| H | -1.30499900 | 3.66990700  | 3.00866000  |
| C | 4.36728100  | 2.62712600  | -1.78193600 |
| H | 5.08376200  | 3.05270700  | -1.07487800 |
| H | 4.82235200  | 1.78944300  | -2.31365200 |
| H | 4.07628200  | 3.40523200  | -2.49258900 |
| C | -0.79000000 | 1.26146000  | -1.43559900 |
| C | -1.86308000 | 0.96904600  | -0.59315300 |
| C | -0.95896100 | 2.09378300  | -2.53846700 |
| C | -3.11600600 | 1.50551300  | -0.86422200 |
| H | -1.70249100 | 0.35000900  | 0.28327700  |
| C | -2.21469300 | 2.63841000  | -2.80144400 |
| H | -0.11197500 | 2.32459200  | -3.17853200 |
| C | -3.29088400 | 2.34014200  | -1.96934900 |
| H | -3.95043400 | 1.27210500  | -0.20827200 |
| H | -2.34828800 | 3.29813400  | -3.65240200 |
| H | -4.26841100 | 2.76360200  | -2.17781100 |
| N | 1.18922400  | 1.03255500  | 0.13262200  |
| S | 1.25538600  | -0.05313500 | 1.39214200  |
| O | 1.67261600  | 0.66494100  | 2.57989900  |
| O | 0.00217300  | -0.82827200 | 1.40945400  |
| C | 2.51067300  | -1.22951400 | 0.92178900  |
| C | 2.37094300  | -2.55253200 | 1.34202300  |
| C | 3.61680000  | -0.81281500 | 0.18797400  |
| C | 3.35922300  | -3.47044200 | 1.00805800  |
| H | 1.50524900  | -2.85255100 | 1.92453400  |
| C | 4.59386800  | -1.74979500 | -0.13715100 |

|   |             |             |             |
|---|-------------|-------------|-------------|
| H | 3.69774500  | 0.22262400  | -0.13370300 |
| C | 4.48060200  | -3.08454000 | 0.26262200  |
| H | 3.26508700  | -4.50204600 | 1.33608900  |
| H | 5.46194800  | -1.43669000 | -0.71045600 |
| C | 5.52793400  | -4.09591700 | -0.11718900 |
| H | 6.48491300  | -3.61375900 | -0.32808700 |
| H | 5.67541100  | -4.82808700 | 0.68057500  |
| H | 5.22589300  | -4.64468200 | -1.01592000 |
| C | -4.34162500 | -1.79351900 | -0.28049100 |
| C | -3.35140900 | -1.67915100 | 0.72487000  |
| C | -3.55803700 | -0.96323900 | 1.90953600  |
| C | -4.80177700 | -0.37935200 | 2.08696900  |
| C | -5.81493000 | -0.50210000 | 1.11168600  |
| C | -5.59676900 | -1.19683500 | -0.06575200 |
| C | -3.74556600 | -2.52584100 | -1.36063200 |
| H | -2.76873400 | -0.86549800 | 2.64885400  |
| H | -5.00138000 | 0.18265500  | 2.99394800  |
| H | -6.77860100 | -0.03514000 | 1.28937800  |
| H | -6.37797300 | -1.27506200 | -0.81619500 |
| N | -2.22714100 | -2.33493600 | 0.28050100  |
| C | -2.46357900 | -2.83150600 | -0.98600400 |
| H | -4.20737900 | -2.79996600 | -2.29886700 |
| C | -1.44895700 | -3.62833100 | -1.75251100 |
| H | -1.57488900 | -4.70040900 | -1.56387900 |
| H | -1.61242900 | -3.46775200 | -2.82047900 |
| H | -1.33518500 | -2.28429400 | 0.75902100  |
| C | 0.01059700  | -3.33065300 | -1.40778000 |
| H | 0.69441700  | -3.81894300 | -2.10335000 |
| H | 0.26710500  | -3.63494500 | -0.38783100 |
| C | 0.44391900  | -0.79480700 | -1.31441300 |
| N | 0.28391900  | -1.92065200 | -1.45092000 |

## IM2

|   |             |             |             |
|---|-------------|-------------|-------------|
| C | 0.65176300  | -0.37931500 | -1.15950300 |
| C | 0.19211200  | -0.20019700 | 1.31543000  |
| H | 1.52504100  | -0.54524400 | -1.80437700 |
| C | -0.72636500 | -1.17912300 | 1.77040400  |
| O | -0.96419700 | -2.25220200 | 1.17912100  |
| O | -1.37246300 | -0.88746500 | 2.92112300  |
| C | 0.38598400  | 1.08565300  | 1.93718400  |
| O | -0.33970000 | 1.64007600  | 2.74698600  |
| O | 1.52844100  | 1.69551200  | 1.49541900  |
| C | -2.31743300 | -1.85428900 | 3.36626700  |
| H | -1.85704500 | -2.83933400 | 3.46627100  |
| H | -2.66343800 | -1.49929100 | 4.33686700  |
| H | -3.17071400 | -1.92504700 | 2.68288500  |
| C | 1.69177500  | 3.03812900  | 1.92574000  |
| H | 1.79180500  | 3.09592100  | 3.01289300  |
| H | 2.60573300  | 3.39683600  | 1.44821000  |
| H | 0.84200500  | 3.65444900  | 1.61856200  |
| C | 0.09057700  | 1.00385200  | -1.42402400 |
| C | -1.26296400 | 1.23724800  | -1.64161100 |
| C | 0.99352300  | 2.06854600  | -1.38688400 |
| C | -1.72275700 | 2.54303500  | -1.80877100 |
| H | -1.97076400 | 0.41388200  | -1.68580000 |
| C | 0.53274400  | 3.36772800  | -1.55903100 |
| H | 2.04538000  | 1.87258900  | -1.19633400 |
| C | -0.82772600 | 3.60615500  | -1.76407000 |
| H | -2.78375600 | 2.71827400  | -1.95581500 |
| H | 1.23328900  | 4.19623000  | -1.52641700 |
| H | -1.18684800 | 4.62299600  | -1.88665900 |
| N | 1.03191600  | -0.57202900 | 0.23549000  |
| S | 2.23842900  | -1.73314200 | 0.44373400  |
| O | 2.29759100  | -2.04965500 | 1.85916300  |

|   |             |             |             |
|---|-------------|-------------|-------------|
| O | 2.01433200  | -2.78159300 | -0.55510500 |
| C | 3.71584000  | -0.86789600 | -0.02973100 |
| C | 4.37074600  | -1.21516600 | -1.20485700 |
| C | 4.17063300  | 0.17274000  | 0.78290100  |
| C | 5.50775200  | -0.49941400 | -1.57640500 |
| H | 3.99931500  | -2.03531400 | -1.81036700 |
| C | 5.30239800  | 0.87274000  | 0.39358400  |
| H | 3.63151200  | 0.43470400  | 1.68743300  |
| C | 5.98542300  | 0.54900300  | -0.78885600 |
| H | 6.03086500  | -0.76269400 | -2.49099300 |
| H | 5.66927500  | 1.68548600  | 1.01476800  |
| C | 7.21318600  | 1.32383600  | -1.18419700 |
| H | 8.00292300  | 1.20366200  | -0.43600400 |
| H | 7.60218500  | 0.98903200  | -2.14795100 |
| H | 6.99238200  | 2.39325300  | -1.25408900 |
| C | -4.64773700 | 0.50838800  | -0.90125000 |
| C | -3.78419200 | 0.13369300  | 0.15904300  |
| C | -3.46571500 | 1.00130500  | 1.21280400  |
| C | -4.07437700 | 2.24470400  | 1.20840100  |
| C | -4.97278900 | 2.62474600  | 0.18894600  |
| C | -5.26011900 | 1.77491500  | -0.86498400 |
| C | -4.63899500 | -0.57427800 | -1.84359100 |
| H | -2.74636300 | 0.72984900  | 1.98125300  |
| H | -3.84397900 | 2.94584700  | 2.00431800  |
| H | -5.43360900 | 3.60703100  | 0.22813800  |
| H | -5.93706100 | 2.08067500  | -1.65774200 |
| N | -3.31182100 | -1.12968400 | -0.12086500 |
| C | -3.81542400 | -1.54574800 | -1.33443400 |
| H | -5.17056500 | -0.62907500 | -2.78357300 |
| C | -3.43910000 | -2.86817100 | -1.93424100 |
| H | -4.12042200 | -3.66118600 | -1.60655900 |
| H | -3.52496600 | -2.79580000 | -3.02063400 |
| H | -2.62692800 | -1.64135200 | 0.43669100  |
| C | -2.03668500 | -3.35249200 | -1.55272900 |
| H | -1.71627000 | -4.18602600 | -2.17860800 |
| H | -1.96476500 | -3.63990000 | -0.49863200 |
| C | -0.31205100 | -1.45611100 | -1.51365200 |
| N | -1.06027700 | -2.30584100 | -1.68297600 |

**TS2**

|   |             |             |             |
|---|-------------|-------------|-------------|
| C | -0.56069800 | -0.66871800 | 0.42625300  |
| C | -0.51342700 | 1.10464300  | -1.32323700 |
| H | -1.31756400 | -1.24926600 | 0.97744600  |
| C | 0.59328100  | 0.61295900  | -2.02800700 |
| O | 0.91765300  | -0.60845500 | -1.99877900 |
| O | 1.33995200  | 1.48102100  | -2.72823400 |
| C | -0.95417800 | 2.47727600  | -1.34276600 |
| O | -0.42762600 | 3.41237200  | -1.91788500 |
| O | -2.09970100 | 2.66295100  | -0.61455000 |
| C | 2.37364900  | 0.91653000  | -3.53300400 |
| H | 1.97416400  | 0.15086900  | -4.20183900 |
| H | 2.77559700  | 1.74749400  | -4.11187700 |
| H | 3.17143200  | 0.48354800  | -2.92184100 |
| C | -2.57896900 | 4.00308600  | -0.60100900 |
| H | -2.81444000 | 4.34384100  | -1.61189800 |
| H | -3.48291900 | 3.99288400  | 0.00942900  |
| H | -1.84010900 | 4.67895300  | -0.16300500 |
| C | 0.23791900  | 0.16292500  | 1.42637300  |
| C | 1.41155700  | -0.30833200 | 2.00986500  |
| C | -0.28040100 | 1.40393300  | 1.80534700  |
| C | 2.07436900  | 0.46673700  | 2.96109400  |
| H | 1.83567500  | -1.27002300 | 1.73121500  |
| C | 0.38746600  | 2.17191700  | 2.75195600  |
| H | -1.19348400 | 1.76616900  | 1.34353100  |

|   |             |             |             |
|---|-------------|-------------|-------------|
| C | 1.56900300  | 1.70801200  | 3.32914500  |
| H | 2.99822300  | 0.09877100  | 3.39482100  |
| H | -0.01367300 | 3.14056800  | 3.03272600  |
| H | 2.09521700  | 2.31474500  | 4.05921900  |
| N | -1.24594800 | 0.14323800  | -0.56536800 |
| S | -2.47082000 | -0.72185800 | -1.36808200 |
| O | -2.89208000 | 0.09834100  | -2.49015500 |
| O | -2.02166100 | -2.09882900 | -1.59553500 |
| C | -3.74759400 | -0.78308900 | -0.13766800 |
| C | -4.23089300 | -2.01523100 | 0.28516000  |
| C | -4.25877100 | 0.41744000  | 0.35755700  |
| C | -5.25515500 | -2.04277800 | 1.22923000  |
| H | -3.81238900 | -2.93050000 | -0.11999900 |
| C | -5.27679400 | 0.36642800  | 1.29741100  |
| H | -3.84683800 | 1.36088900  | 0.01087500  |
| C | -5.78947000 | -0.86049200 | 1.74478200  |
| H | -5.64355600 | -2.99828700 | 1.56904200  |
| H | -5.68552900 | 1.29081900  | 1.69625600  |
| C | -6.89779600 | -0.88599300 | 2.76192900  |
| H | -7.79191100 | -0.39111500 | 2.37025000  |
| H | -7.16482100 | -1.90891200 | 3.03440200  |
| H | -6.60309100 | -0.35280900 | 3.67088600  |
| C | 4.77963200  | -0.65078300 | 1.08376300  |
| C | 3.97847600  | -0.08724900 | 0.06010200  |
| C | 3.84433000  | 1.29536600  | -0.11737600 |
| C | 4.56119700  | 2.11427500  | 0.73784800  |
| C | 5.39493200  | 1.57687100  | 1.74173800  |
| C | 5.51088300  | 0.20949900  | 1.92273100  |
| C | 4.57659500  | -2.07040800 | 1.02692300  |
| H | 3.18175100  | 1.70622200  | -0.87479900 |
| H | 4.47576900  | 3.19154900  | 0.63721800  |
| H | 5.94704400  | 2.25276500  | 2.38748400  |
| H | 6.14238700  | -0.19428300 | 2.70913300  |
| N | 3.36134300  | -1.12130400 | -0.60325400 |
| C | 3.70315600  | -2.31402000 | -0.00356300 |
| H | 5.01767700  | -2.82146000 | 1.66773400  |
| C | 3.14415000  | -3.62926000 | -0.46178700 |
| H | 3.80118300  | -4.09829600 | -1.20298300 |
| H | 3.09685400  | -4.30280400 | 0.39712300  |
| H | 2.63546600  | -0.98649900 | -1.30805900 |
| C | 1.76998900  | -3.54035800 | -1.12915500 |
| H | 1.33096700  | -4.53156000 | -1.24229000 |
| H | 1.81914200  | -3.05395600 | -2.10796100 |
| C | 0.28848100  | -1.73253400 | -0.19900500 |
| N | 0.85361400  | -2.73217800 | -0.35675000 |

### 3a

|   |             |             |             |
|---|-------------|-------------|-------------|
| C | -0.43578200 | -0.49892800 | -0.44823300 |
| C | -0.81072900 | 1.83156900  | 0.09636200  |
| H | -0.96139700 | -1.36151100 | -0.86926900 |
| C | 0.41358300  | 2.09340600  | -0.40282000 |
| O | 1.03145600  | 1.25460000  | -1.27739500 |
| O | 1.19553100  | 3.11530000  | -0.07206500 |
| C | -1.47192100 | 2.74177100  | 1.05642000  |
| O | -1.20192900 | 3.91349400  | 1.19441800  |
| O | -2.40999400 | 2.10949900  | 1.77394300  |
| C | 1.04119300  | 4.28000500  | -0.90921700 |
| H | 0.02022600  | 4.65554900  | -0.82637400 |
| H | 1.74686900  | 5.01511100  | -0.52565500 |
| H | 1.28500600  | 4.03185100  | -1.94584000 |
| C | -3.14741300 | 2.94718200  | 2.66964000  |
| H | -3.65939100 | 3.73488800  | 2.11311300  |
| H | -3.87030700 | 2.29519100  | 3.15766300  |
| H | -2.48070900 | 3.39630800  | 3.40835500  |

|   |             |             |             |
|---|-------------|-------------|-------------|
| C | 0.25429600  | -0.89060700 | 0.85617800  |
| C | 1.49192000  | -1.53518900 | 0.82364400  |
| C | -0.35964100 | -0.63554900 | 2.08450700  |
| C | 2.11357300  | -1.91354800 | 2.01189600  |
| H | 1.97892800  | -1.74319900 | -0.12654800 |
| C | 0.26396900  | -1.01914200 | 3.26838100  |
| H | -1.31685600 | -0.12391100 | 2.10972200  |
| C | 1.50295600  | -1.65535200 | 3.23581100  |
| H | 3.08590300  | -2.39515600 | 1.97426600  |
| H | -0.21758200 | -0.81085100 | 4.21883200  |
| H | 1.99444000  | -1.94260000 | 4.16010900  |
| N | -1.40514600 | 0.57680300  | -0.21022300 |
| S | -2.71645400 | 0.63757500  | -1.28669500 |
| O | -3.35630900 | 1.92006000  | -1.02860900 |
| O | -2.27859100 | 0.31144400  | -2.64006600 |
| C | -3.70794800 | -0.69263200 | -0.67710000 |
| C | -4.01666400 | -1.75685100 | -1.51380400 |
| C | -4.17365400 | -0.62287700 | 0.63679900  |
| C | -4.81695600 | -2.78252100 | -1.01492900 |
| H | -3.63554000 | -1.78006700 | -2.52935500 |
| C | -4.96731700 | -1.65464500 | 1.11176700  |
| H | -3.90396200 | 0.22371400  | 1.26256400  |
| C | -5.29934900 | -2.74632300 | 0.29456100  |
| H | -5.06699000 | -3.62372900 | -1.65430600 |
| H | -5.33762700 | -1.62161300 | 2.13255200  |
| C | -6.15791400 | -3.85561200 | 0.83796600  |
| H | -7.11823300 | -3.46562500 | 1.18855900  |
| H | -6.35182000 | -4.61670800 | 0.07986400  |
| H | -5.67099100 | -4.33733900 | 1.69153400  |
| C | 4.95927500  | -1.46793400 | -0.05691500 |
| C | 4.43103600  | -0.15611000 | 0.04095200  |
| C | 4.56376600  | 0.62467600  | 1.19340300  |
| C | 5.26148500  | 0.07495700  | 2.25614300  |
| C | 5.81947800  | -1.21787300 | 2.17492600  |
| C | 5.67571500  | -1.99083100 | 1.03428700  |
| C | 4.57001300  | -1.97143200 | -1.34370400 |
| H | 4.12293600  | 1.61539000  | 1.25117700  |
| H | 5.38148600  | 0.64983000  | 3.16899500  |
| H | 6.36690700  | -1.61211500 | 3.02551800  |
| H | 6.10093600  | -2.98923000 | 0.98431000  |
| N | 3.78255800  | 0.11466800  | -1.14004100 |
| C | 3.85591100  | -0.98299600 | -1.97256400 |
| H | 4.78820100  | -2.94564100 | -1.75861900 |
| C | 3.22674500  | -0.98632700 | -3.33294600 |
| H | 3.91431800  | -0.55508100 | -4.07040700 |
| H | 3.05240400  | -2.02633800 | -3.62144000 |
| H | 3.25956900  | 0.95970200  | -1.32584600 |
| C | 1.91159200  | -0.20385500 | -3.41046400 |
| H | 1.48875600  | -0.34127200 | -4.40942100 |
| H | 2.09680800  | 0.86831100  | -3.27942300 |
| C | 0.55254300  | -0.03192200 | -1.49382100 |
| N | 0.94646000  | -0.73394400 | -2.45574700 |

## 8. Copy of $^1\text{H}$ NMR and $^{13}\text{C}$ NMR Spectra

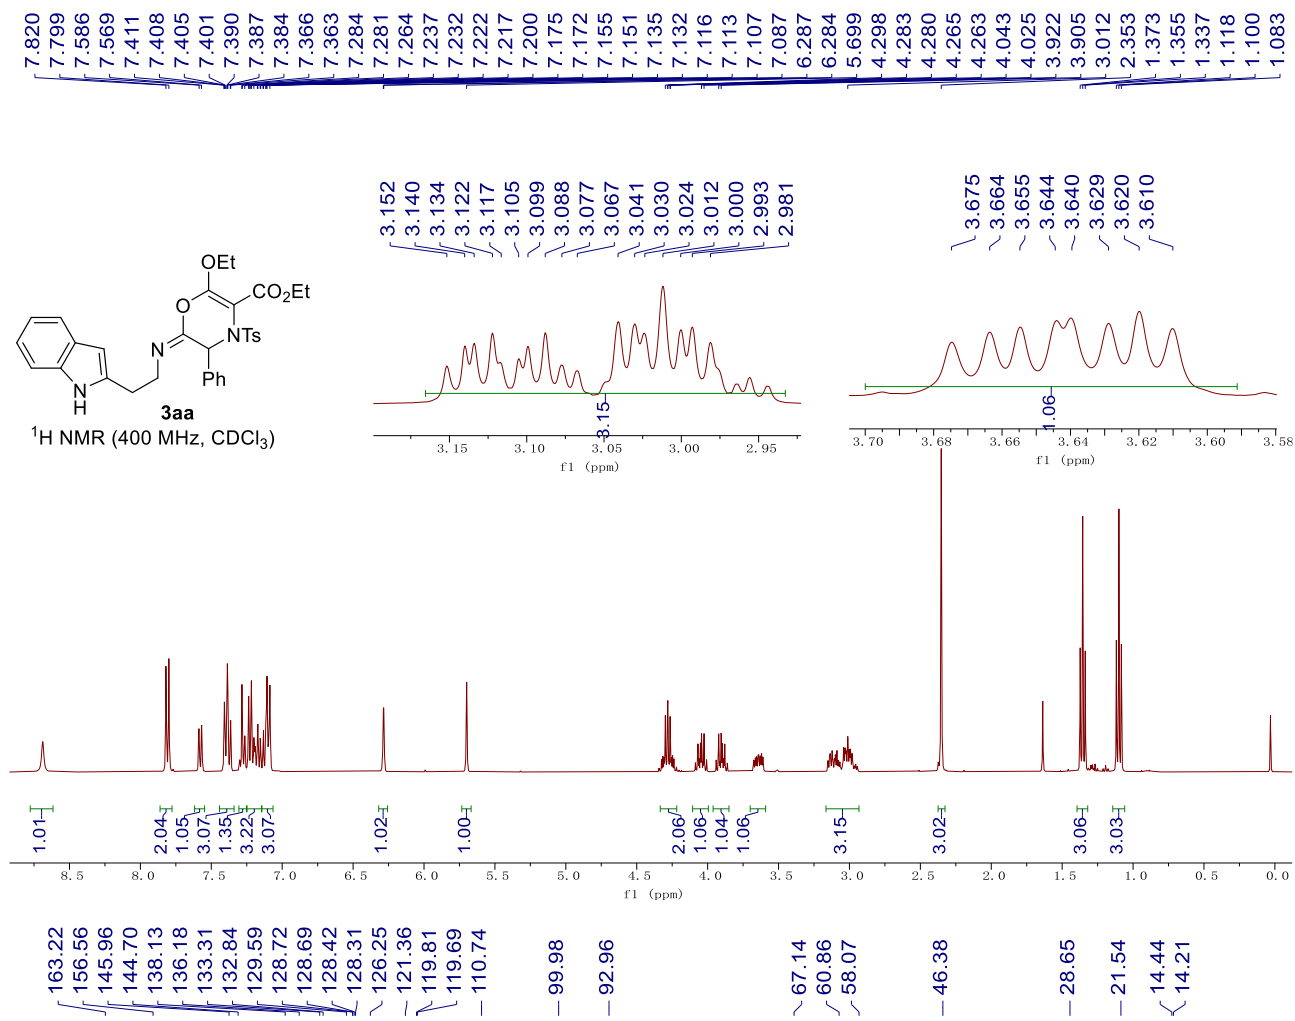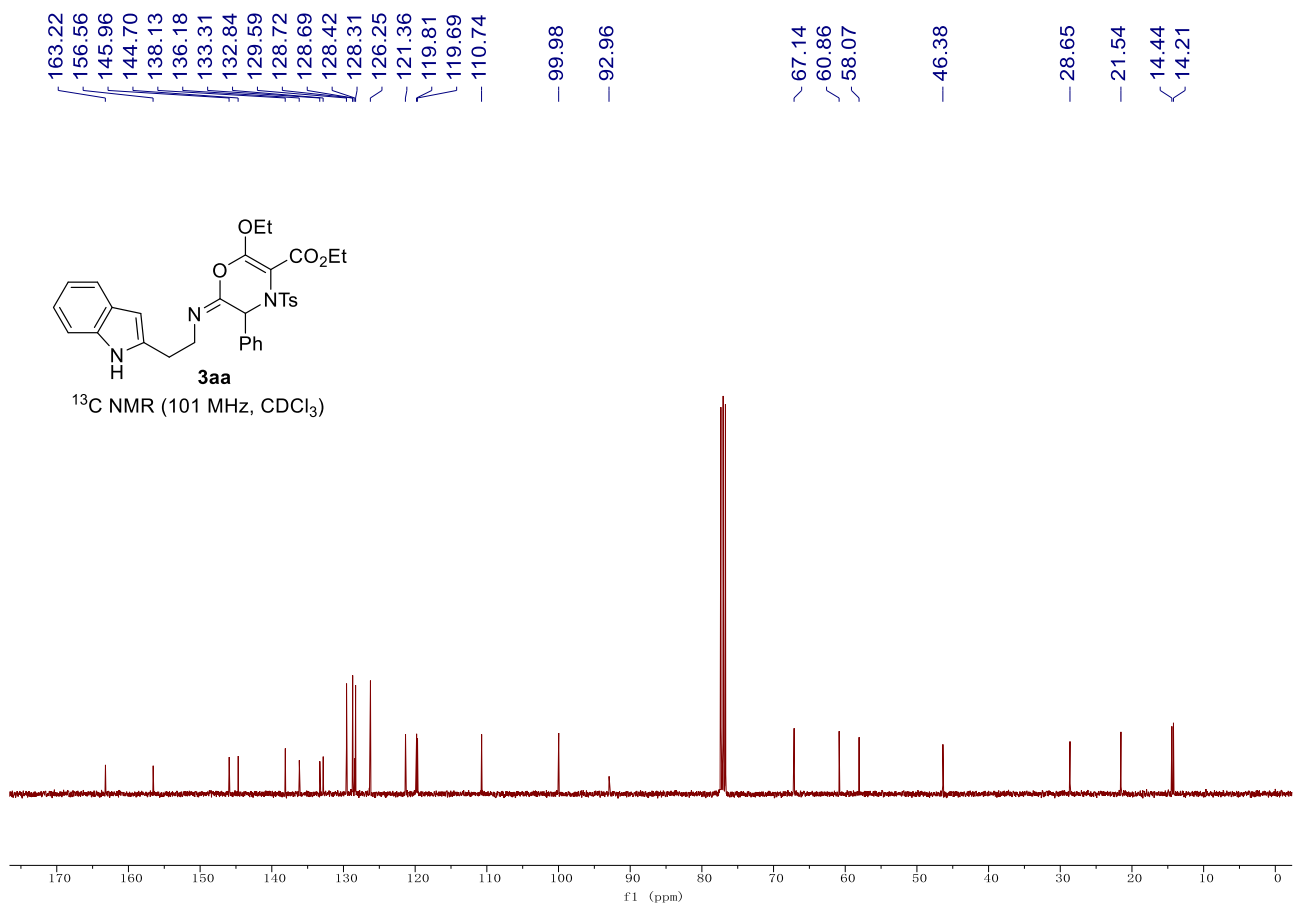

8.654  
7.950  
7.947  
7.943  
7.929  
7.925  
7.581  
7.578  
7.570  
7.562  
7.559  
7.551  
7.385  
7.383  
7.380  
7.365  
7.362  
7.359  
7.350  
7.346  
7.284  
7.276  
7.259  
7.256  
7.218  
7.214  
7.202  
7.199  
7.185  
7.181  
7.168  
7.164  
7.148  
7.144  
7.130  
7.127  
7.110  
7.107  
6.284  
6.281  
5.741  
4.296  
4.279  
4.261  
4.034  
4.027  
4.009  
3.906  
3.889  
3.881  
3.871  
3.863  
3.846

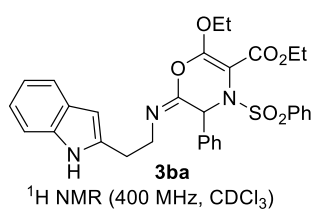

<sup>1</sup>H NMR (400 MHz, CDCl<sub>3</sub>)

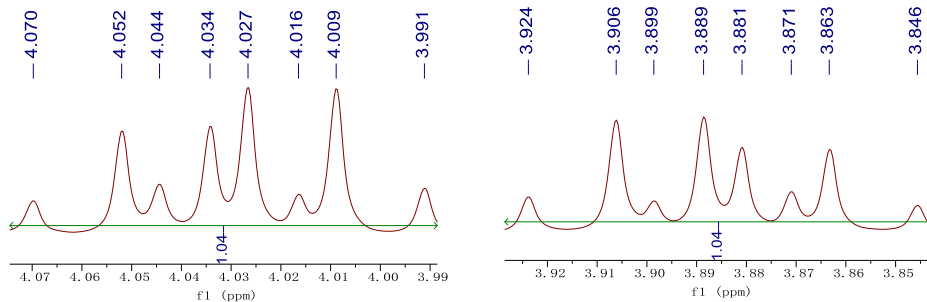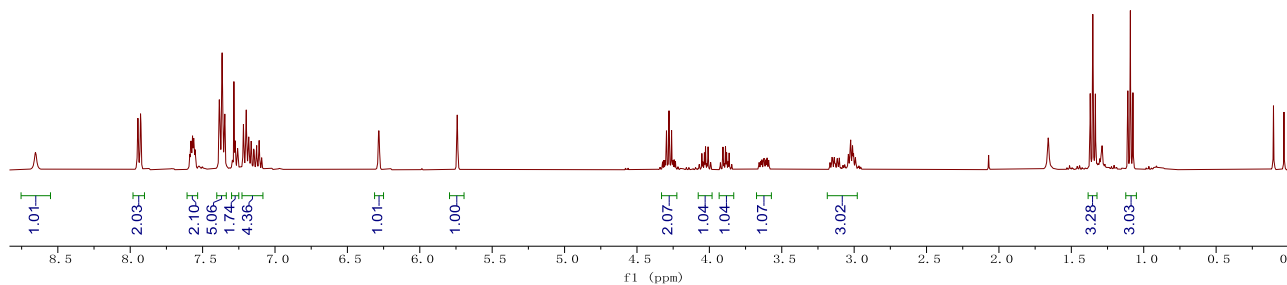

163.16  
156.70  
145.76  
137.99  
136.13  
136.11  
133.59  
132.76  
129.00  
128.74  
128.71  
128.42  
128.34  
126.24  
121.36  
119.81  
119.70  
110.70  
100.05  
92.79  
67.13  
60.88  
58.19  
46.32  
28.67  
14.44  
14.19

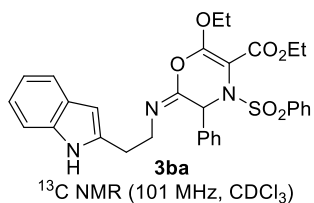

<sup>13</sup>C NMR (101 MHz, CDCl<sub>3</sub>)

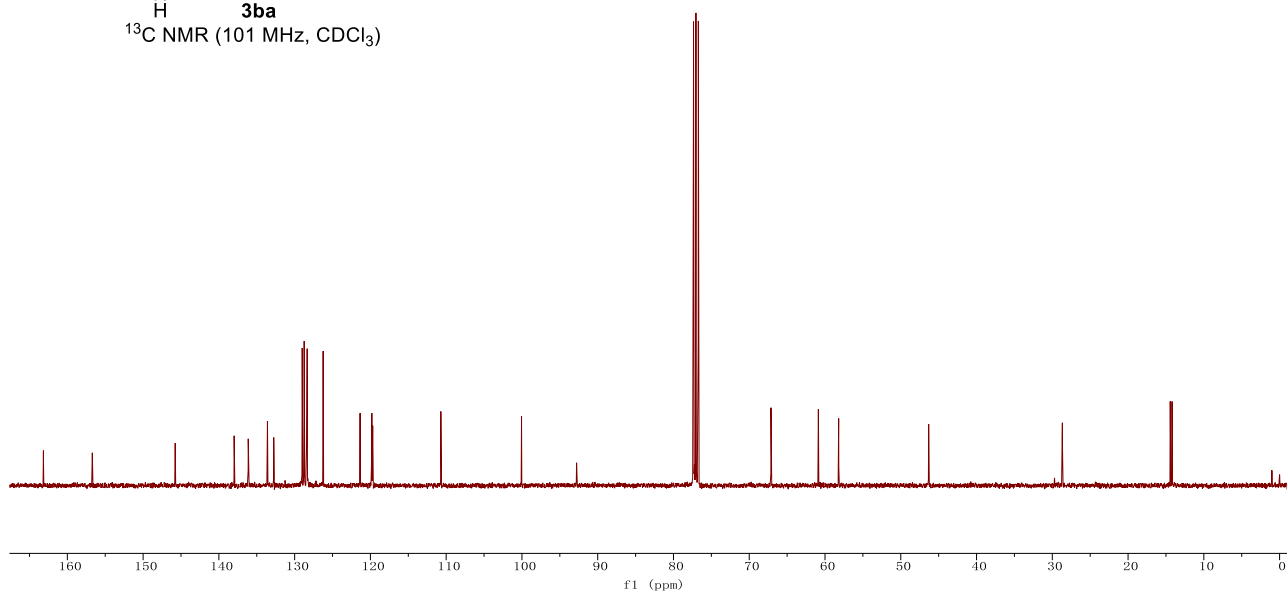

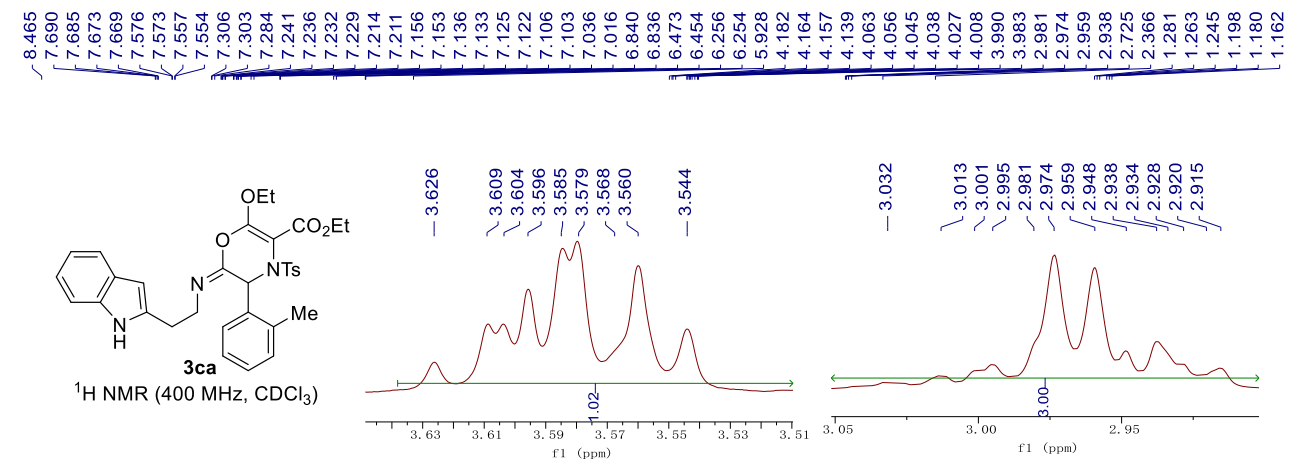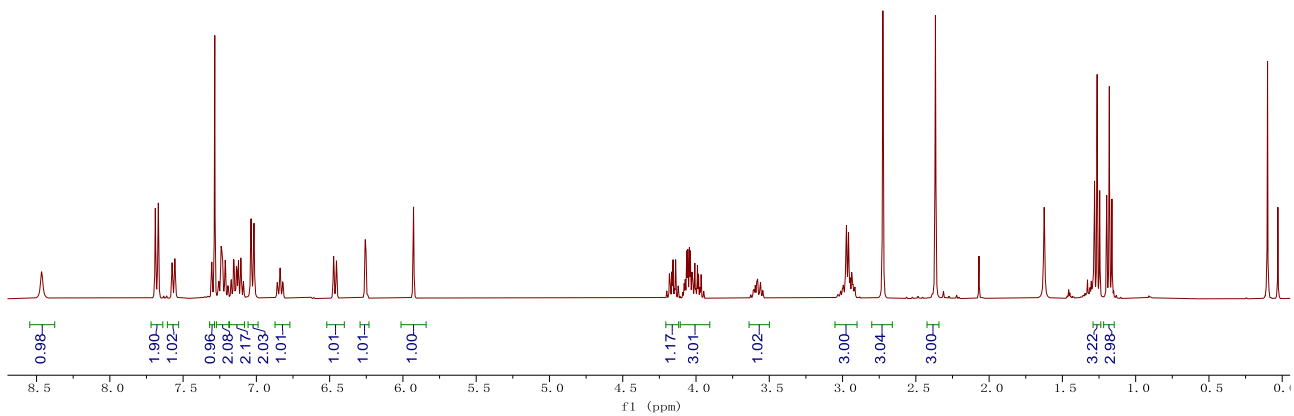



8.708  
7.802  
7.797  
7.785  
7.781  
7.586  
7.566  
7.383  
7.380  
7.370  
7.366  
7.363  
7.360  
7.182  
7.168  
7.165  
7.162  
7.148  
7.145  
7.128  
7.125  
7.108  
7.106  
7.096  
7.092  
7.085  
7.065  
6.283  
6.280  
5.685  
4.305  
4.300  
4.288  
4.282  
4.270  
4.265  
4.075  
4.057  
4.049  
4.049  
4.039  
4.032  
4.014

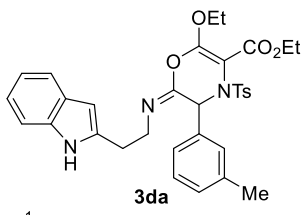

<sup>1</sup>H NMR (400 MHz, CDCl<sub>3</sub>)

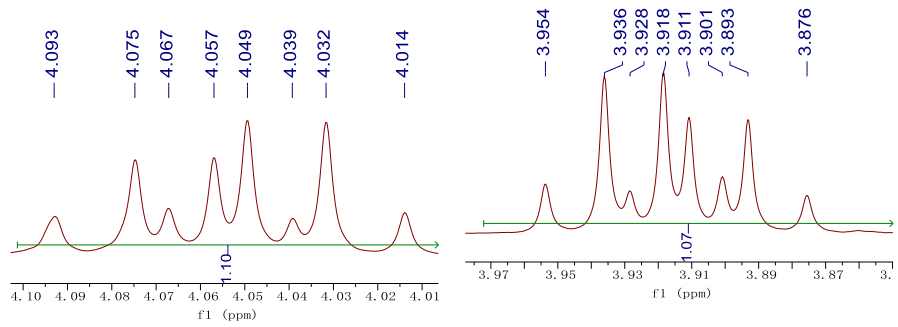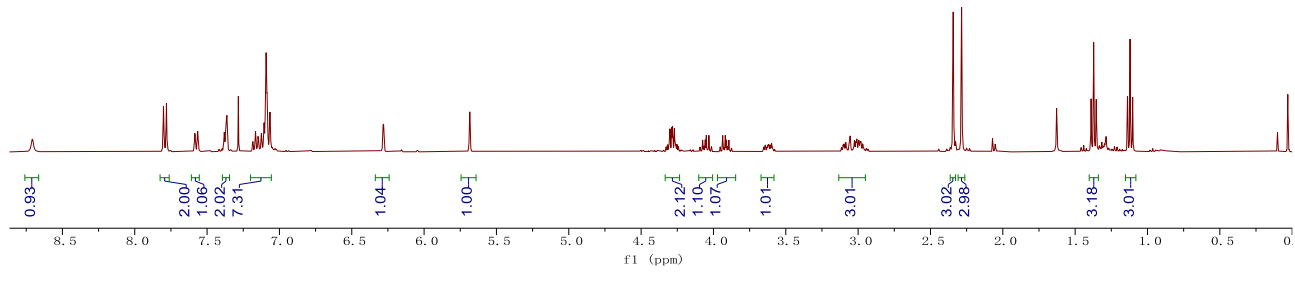

163.22  
156.54  
146.01  
144.65  
138.58  
138.17  
136.19  
133.31  
132.75  
129.55  
129.46  
128.54  
128.38  
128.29  
127.05  
123.08  
121.35  
119.80  
119.66  
110.71  
99.94  
92.98  
67.12  
60.84  
58.03  
46.31  
28.62  
21.51  
21.42  
14.45  
14.24

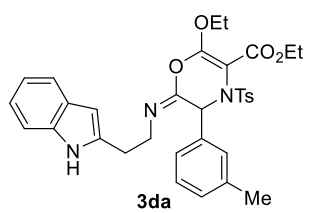

<sup>13</sup>C NMR (101 MHz, CDCl<sub>3</sub>)

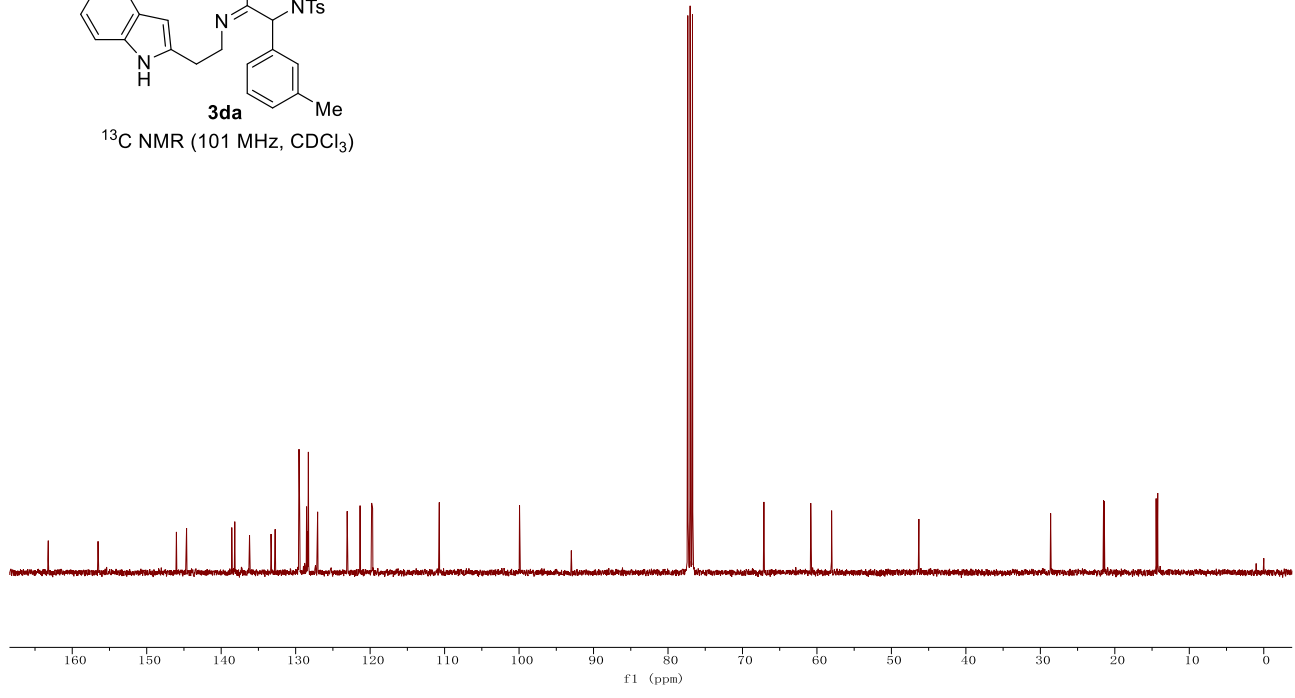

8.624  
7.780  
7.775  
7.764  
7.759  
7.659  
7.655  
7.651  
7.647  
7.585  
7.566  
7.395  
7.376  
7.282  
7.276  
7.274  
7.271  
7.256  
7.254  
7.251  
7.178  
7.175  
7.158  
7.154  
7.148  
7.146  
7.144  
7.135  
7.132  
7.128  
7.125  
7.116  
7.113  
7.085  
7.072  
7.064  
7.053  
6.288  
6.285  
5.678  
4.327  
4.310  
4.296  
4.278  
4.079  
4.061  
4.053  
3.941  
3.923  
3.906  
3.008  
2.345  
1.418  
1.400  
1.383  
1.143  
1.125  
1.107

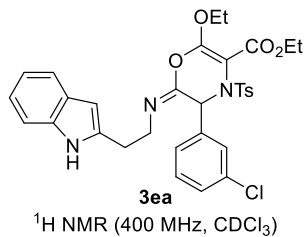

<sup>1</sup>H NMR (400 MHz, CDCl<sub>3</sub>)

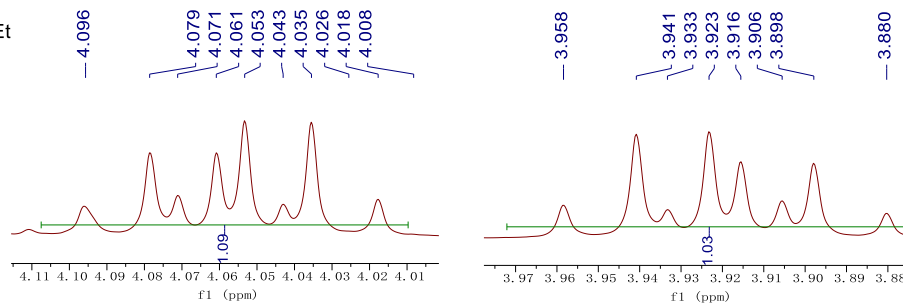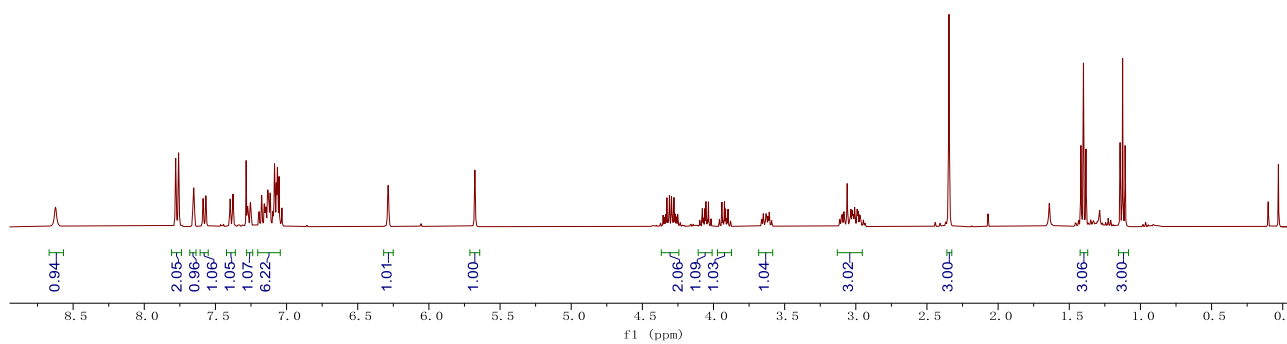

162.98  
156.43  
145.38  
144.87  
137.92  
136.17  
134.99  
134.96  
133.02  
129.96  
129.62  
128.99  
128.44  
128.28  
126.79  
124.21  
121.43  
119.86  
119.74  
110.70  
100.05  
92.83  
67.25  
61.07  
57.66  
46.42  
28.65  
21.53  
14.45  
14.20

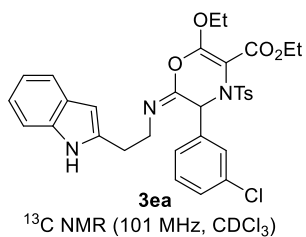

<sup>13</sup>C NMR (101 MHz, CDCl<sub>3</sub>)

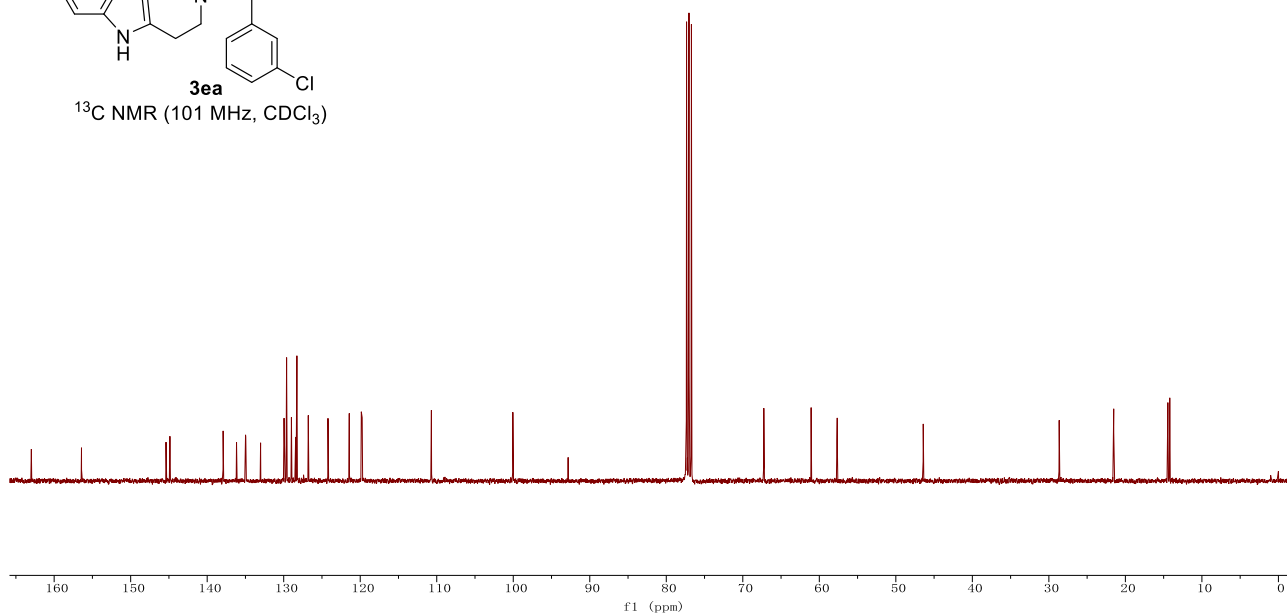

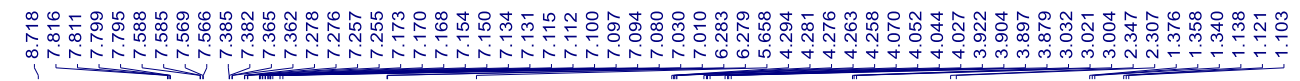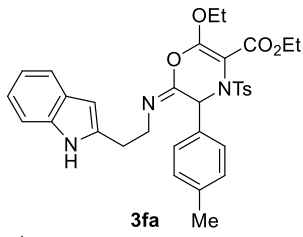

<sup>1</sup>H NMR (400 MHz, CDCl<sub>3</sub>)

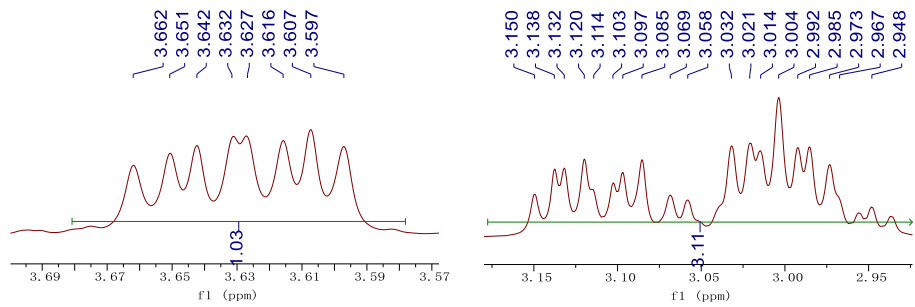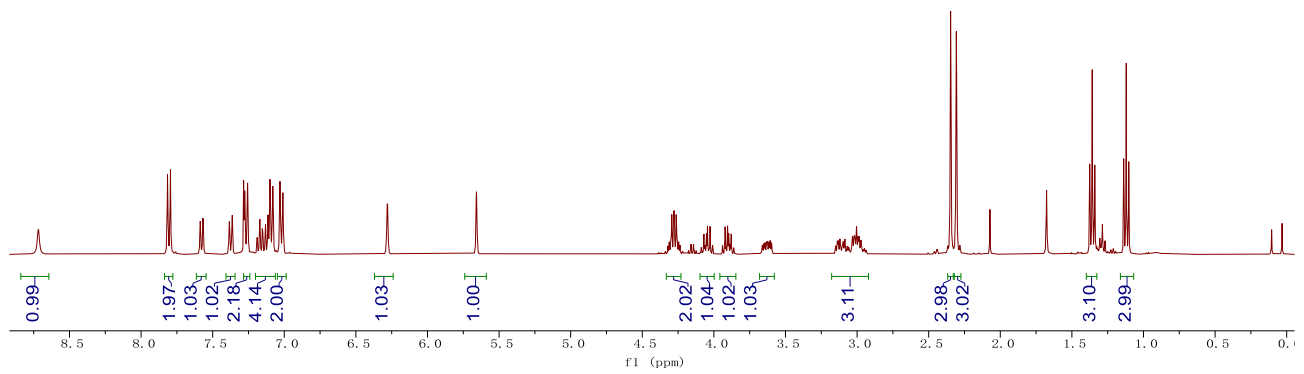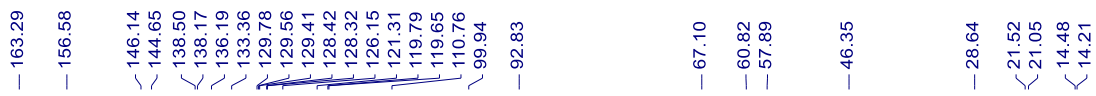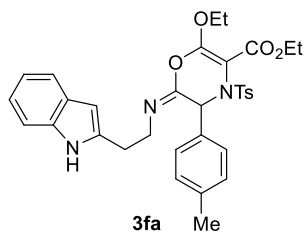

<sup>13</sup>C NMR (101 MHz, CDCl<sub>3</sub>)

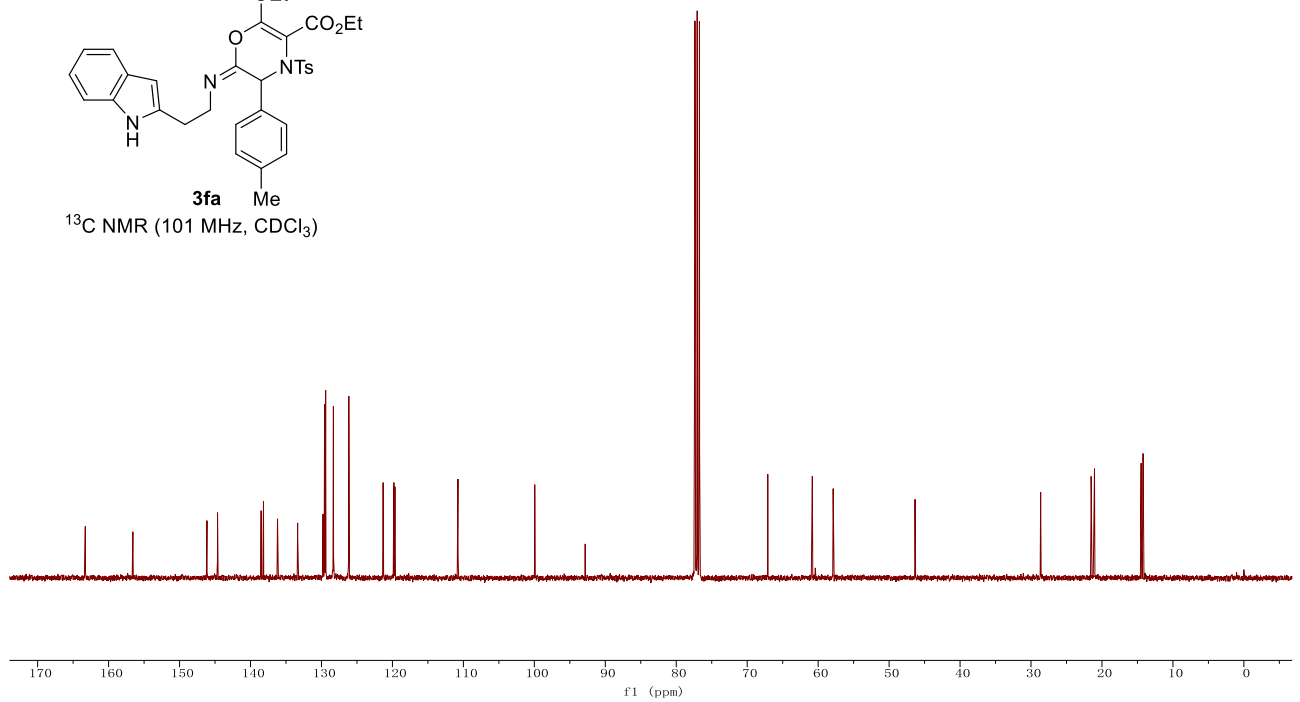

8.683  
7.827  
7.822  
7.810  
7.806  
7.582  
7.563  
7.370  
7.349  
7.284  
7.274  
7.255  
7.252  
7.170  
7.167  
7.150  
7.146  
7.132  
7.129  
7.119  
7.114  
7.111  
7.098  
7.046  
7.041  
7.030  
7.025  
6.282  
6.277  
5.646  
4.307  
4.289  
4.284  
4.267  
4.072  
4.054  
4.046  
4.029  
3.936  
3.919  
3.911  
3.893  
3.028  
3.022  
3.012  
3.002  
2.854  
2.837  
2.356  
1.375  
1.357  
1.339  
1.220  
1.214  
1.203  
1.196  
1.119  
1.101  
1.084

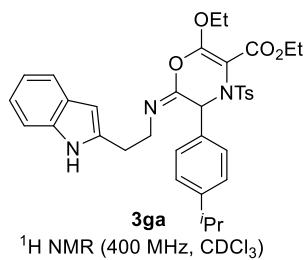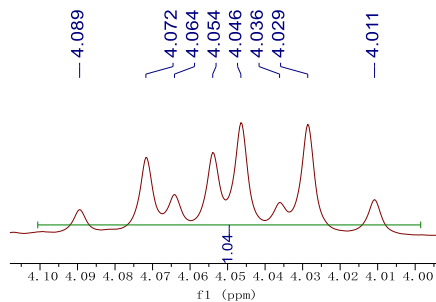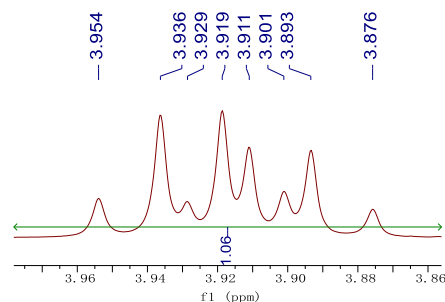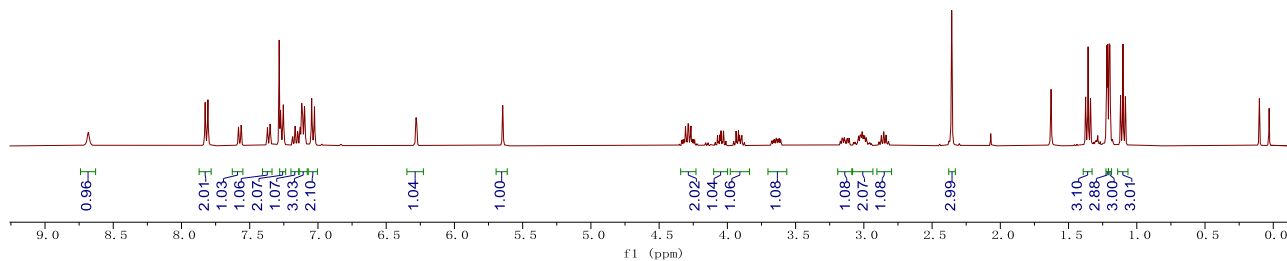

163.31  
156.58  
149.42  
146.23  
144.62  
138.16  
136.18  
133.41  
130.05  
129.55  
128.44  
128.36  
126.79  
126.19  
121.30  
119.80  
119.65  
110.77  
99.96  
92.97  
67.14  
60.80  
57.92  
46.35  
33.71  
28.66  
23.84  
23.79  
21.52  
14.40  
14.20

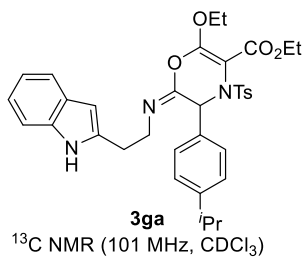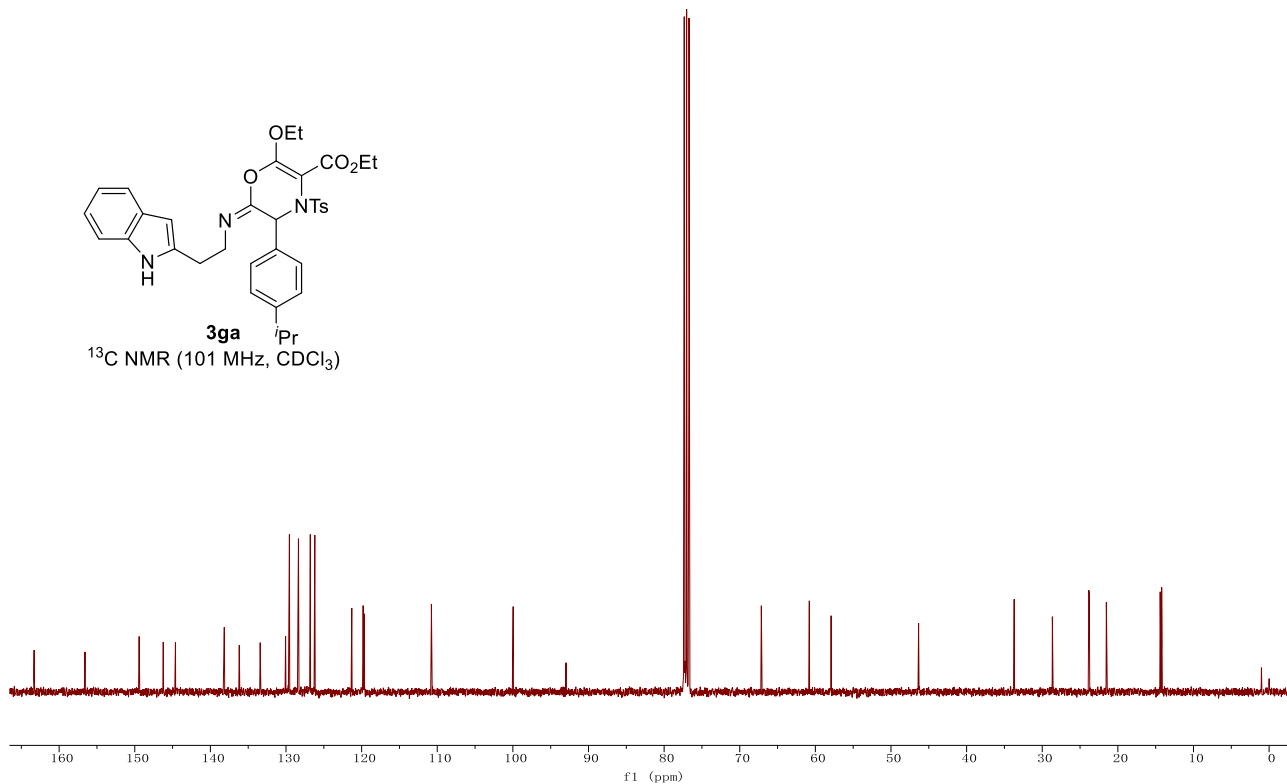

8.682  
7.843  
7.839  
7.827  
7.823  
7.593  
7.577  
7.550  
7.546  
7.532  
7.529  
7.526  
7.473  
7.471  
7.453  
7.449  
7.437  
7.433  
7.401  
7.398  
7.390  
7.386  
7.377  
7.375  
7.371  
7.183  
7.180  
7.164  
7.160  
7.146  
7.143  
7.136  
7.127  
7.124  
7.116  
7.109  
6.302  
6.299  
5.722  
4.313  
4.299  
4.295  
4.282  
4.097  
4.079  
4.071  
3.953  
3.946  
3.936  
3.928  
3.936  
3.918  
3.910  
3.040  
2.369  
1.389  
1.371  
1.353  
1.147  
1.130  
1.112

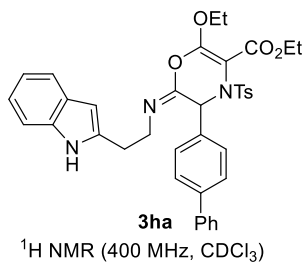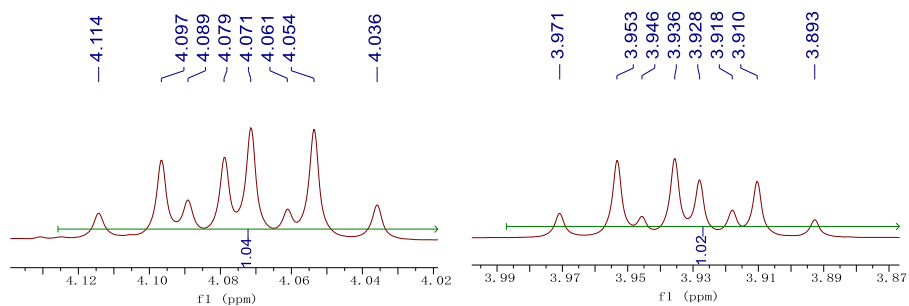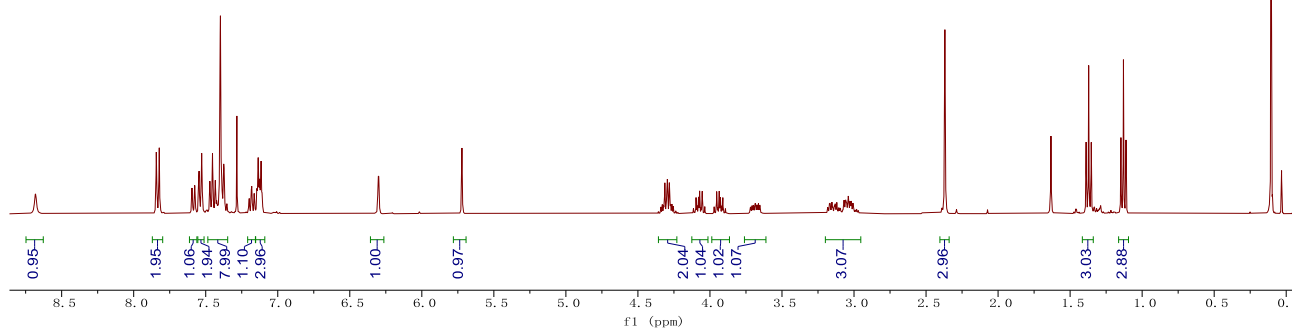

163.26  
 156.62  
 145.99  
 144.72  
 141.47  
 140.17  
 138.09  
 136.17  
 133.31  
 131.77  
 129.60  
 128.82  
 128.48  
 128.37  
 127.60  
 127.35  
 127.01  
 126.70  
 121.39  
 119.86  
 119.73  
 110.79  
 100.02  
 92.93  
 67.19  
 60.90  
 57.94  
 46.40  
 28.69  
 21.56  
 14.48  
 14.24

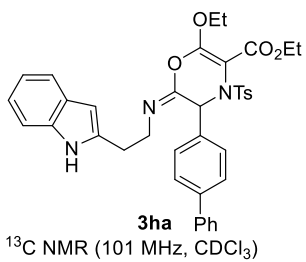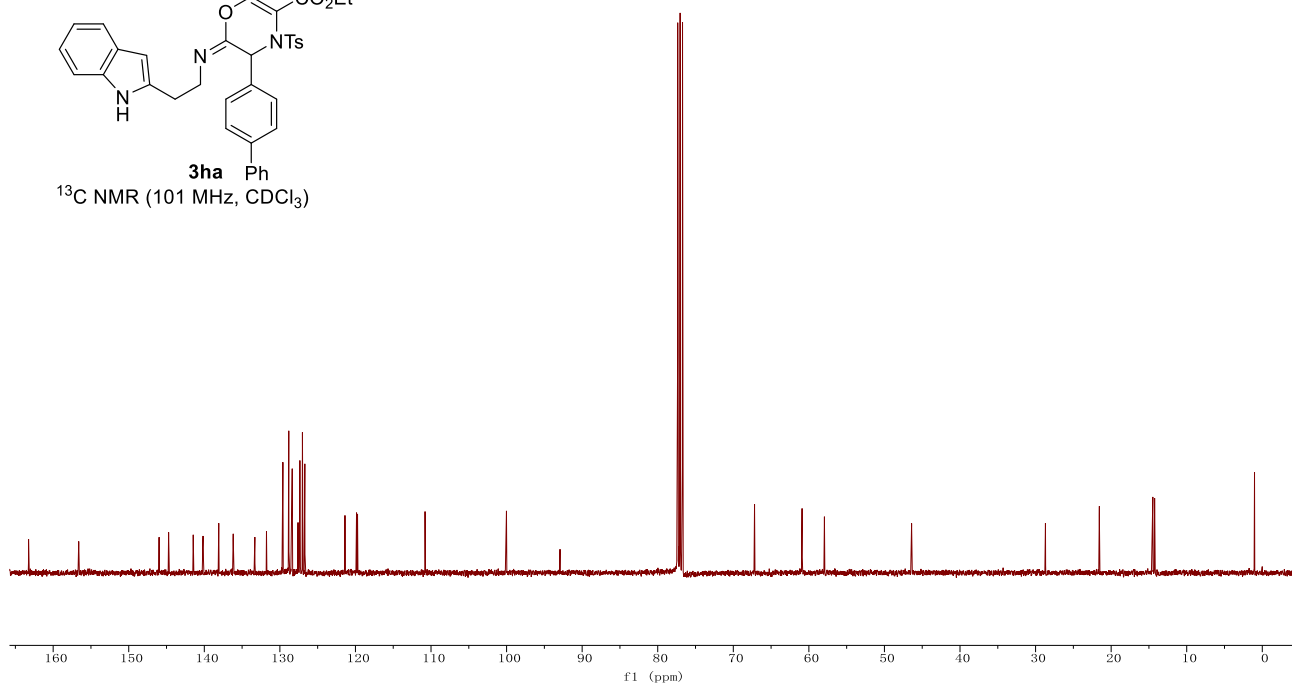

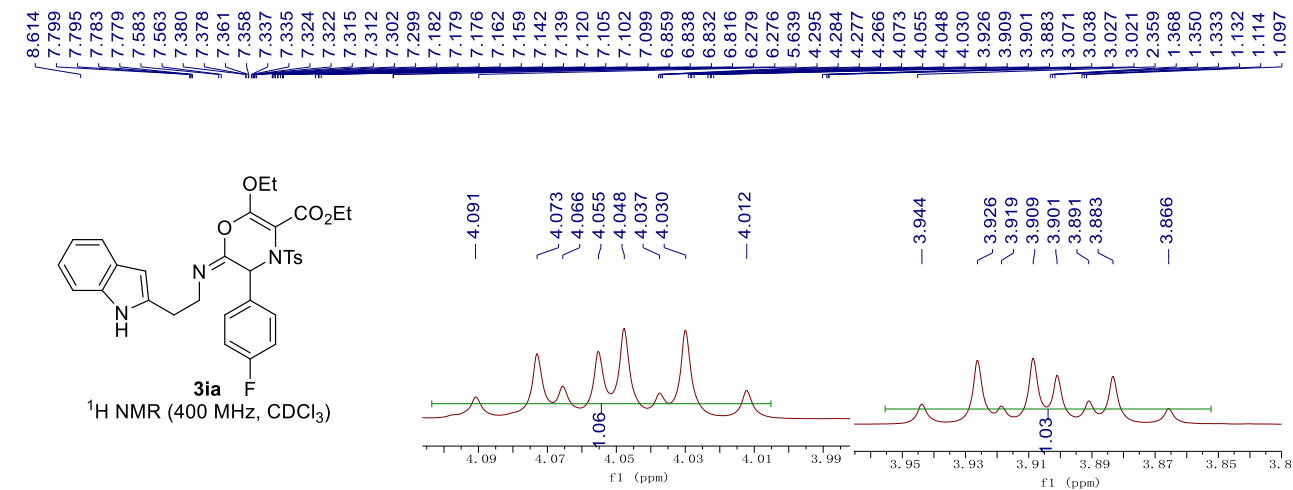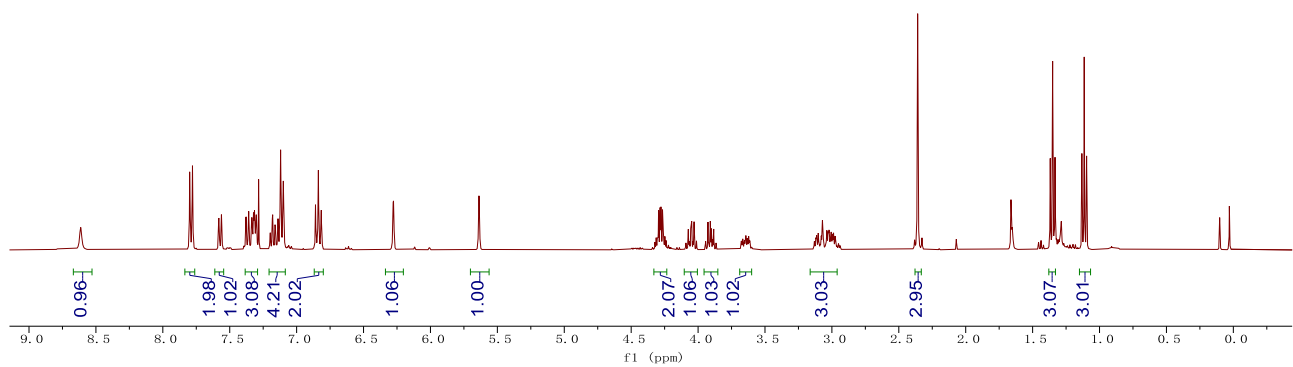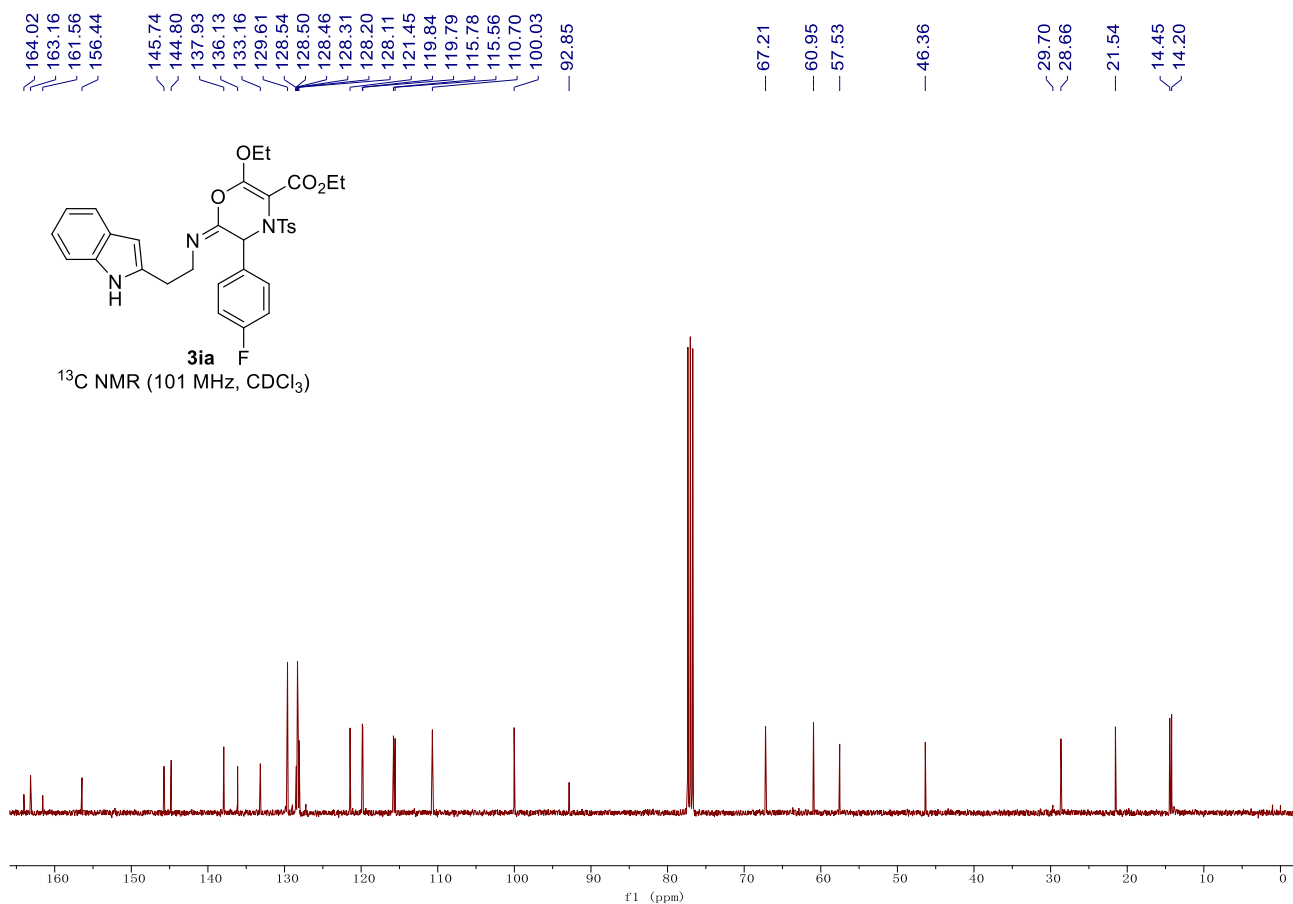

-113.086

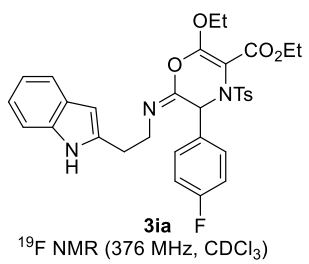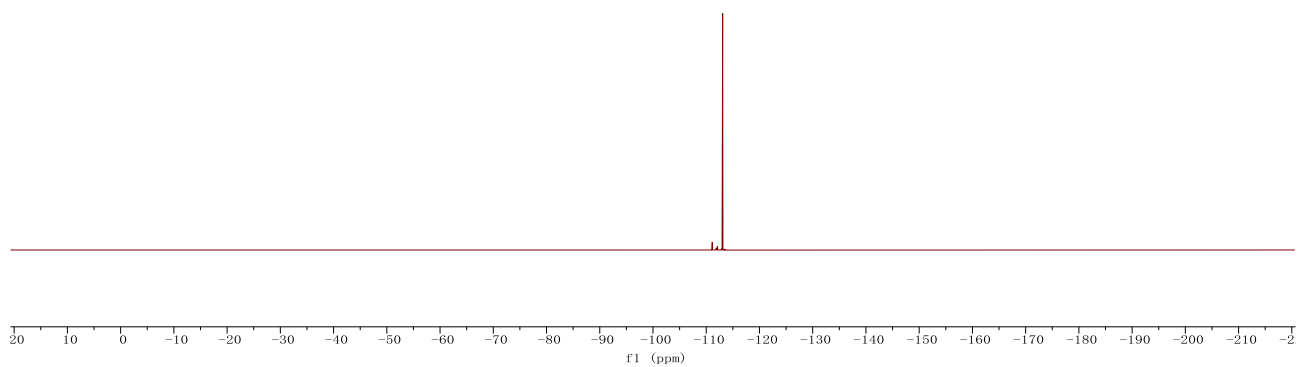

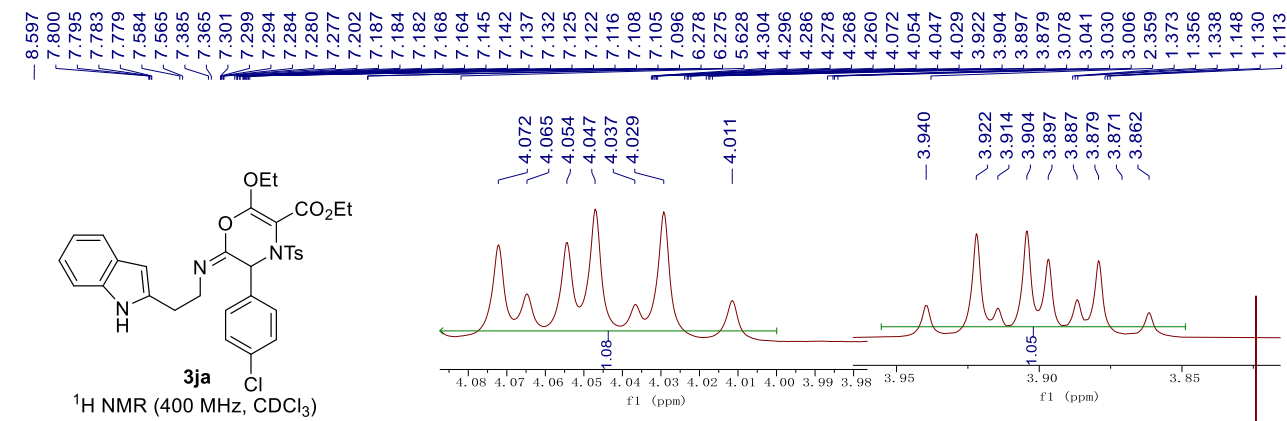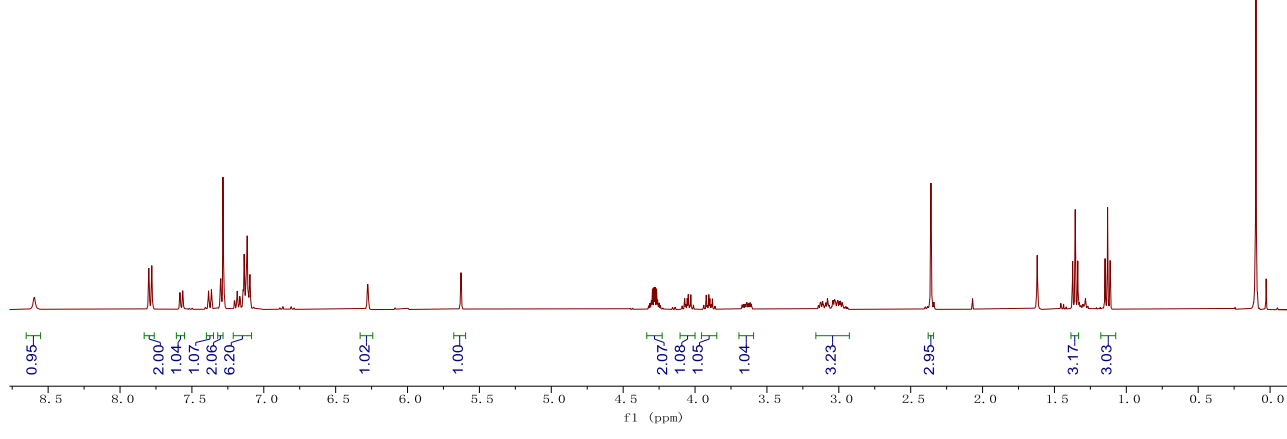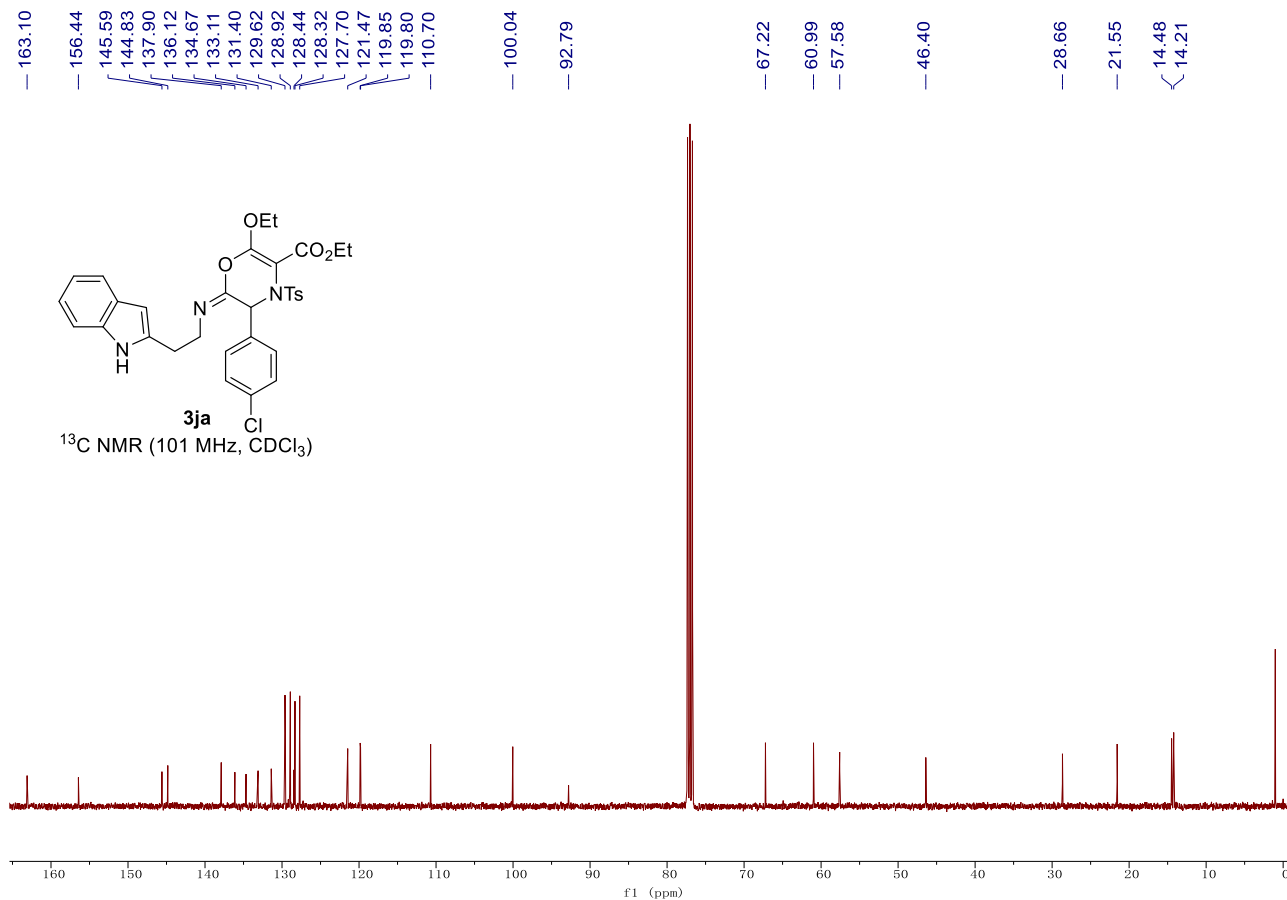



8.600  
7.798  
7.793  
7.782  
7.777  
7.580  
7.561  
7.382  
7.362  
7.284  
7.279  
7.268  
7.262  
7.256  
7.236  
7.231  
7.228  
7.223  
7.209  
7.206  
7.202  
7.188  
7.184  
7.168  
7.164  
7.146  
7.143  
7.126  
7.124  
7.119  
7.109  
7.106  
7.099  
6.276  
6.274  
5.605  
4.303  
4.295  
4.285  
4.277  
4.267  
4.259  
4.071  
4.054  
4.028  
3.920  
3.920  
3.912  
3.902  
3.895  
3.877  
3.877  
3.028  
3.007  
2.360  
1.373  
1.355  
1.337  
1.151  
1.133  
1.115

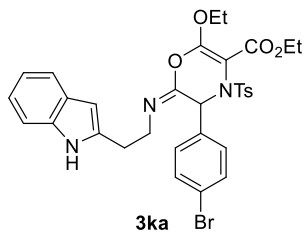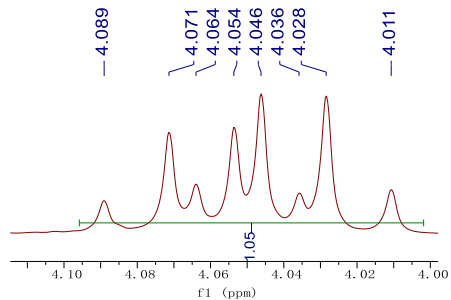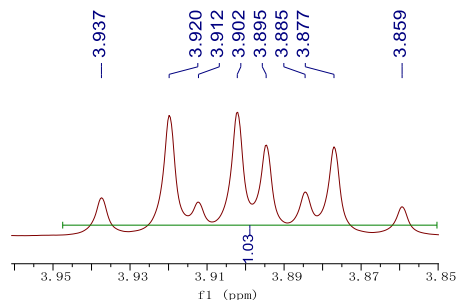

<sup>1</sup>H NMR (400 MHz, CDCl<sub>3</sub>)

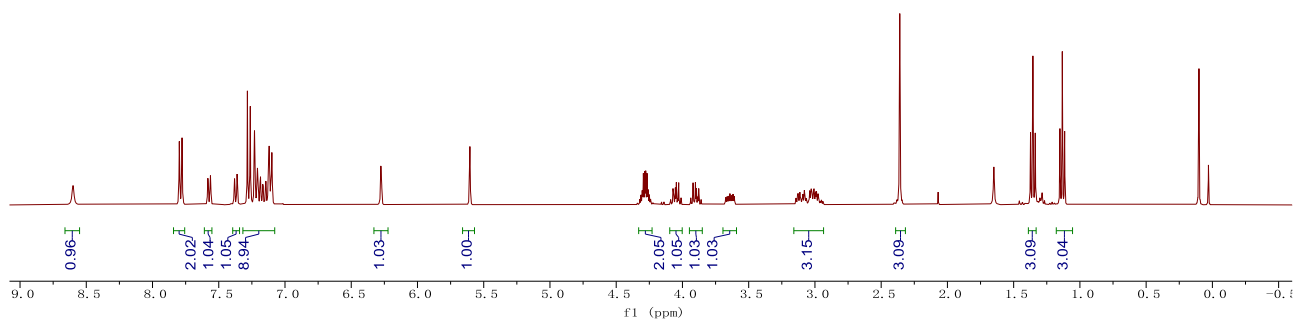

163.10  
156.45  
145.52  
144.84  
137.87  
136.13  
133.11  
131.97  
131.88  
129.62  
128.46  
128.32  
128.01  
122.86  
121.46  
119.85  
119.80  
110.72  
100.04  
92.77  
67.23  
60.99  
57.65  
46.40  
28.67  
21.55  
14.49  
14.21

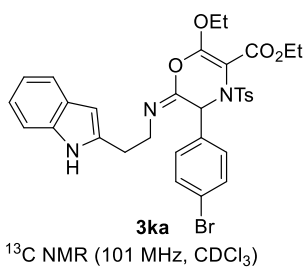

<sup>13</sup>C NMR (101 MHz, CDCl<sub>3</sub>)

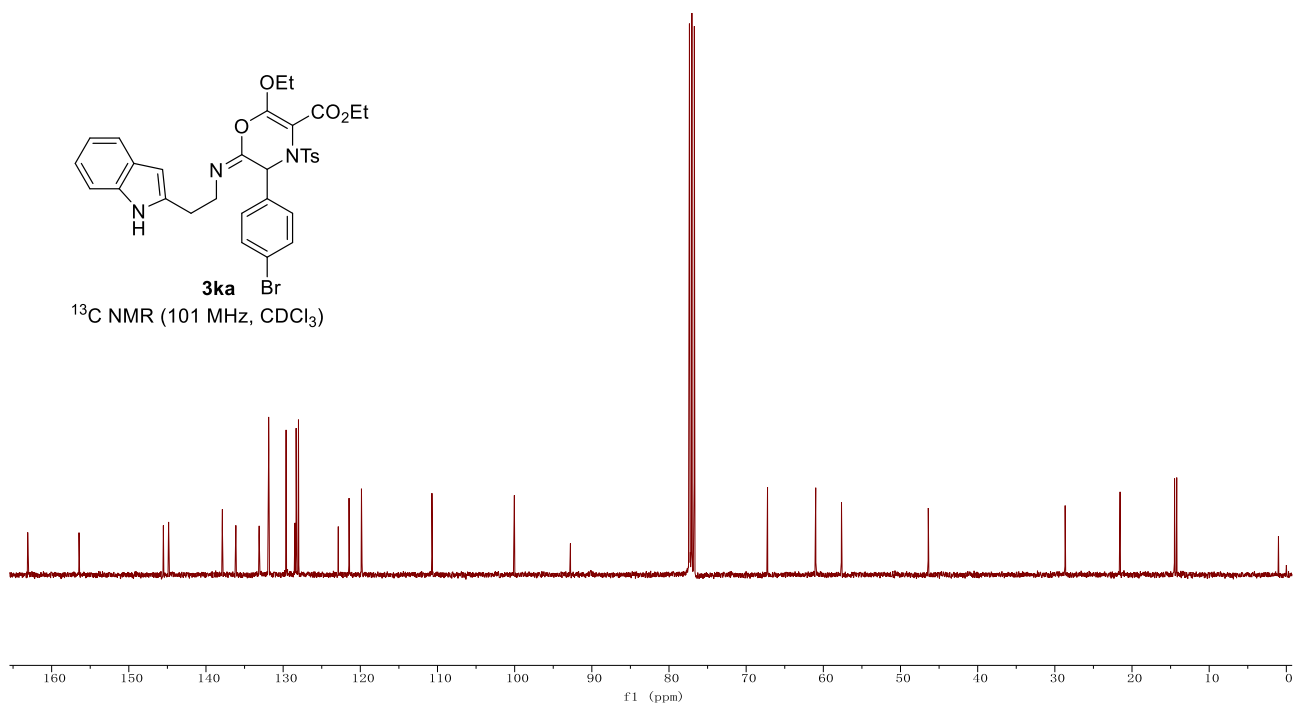

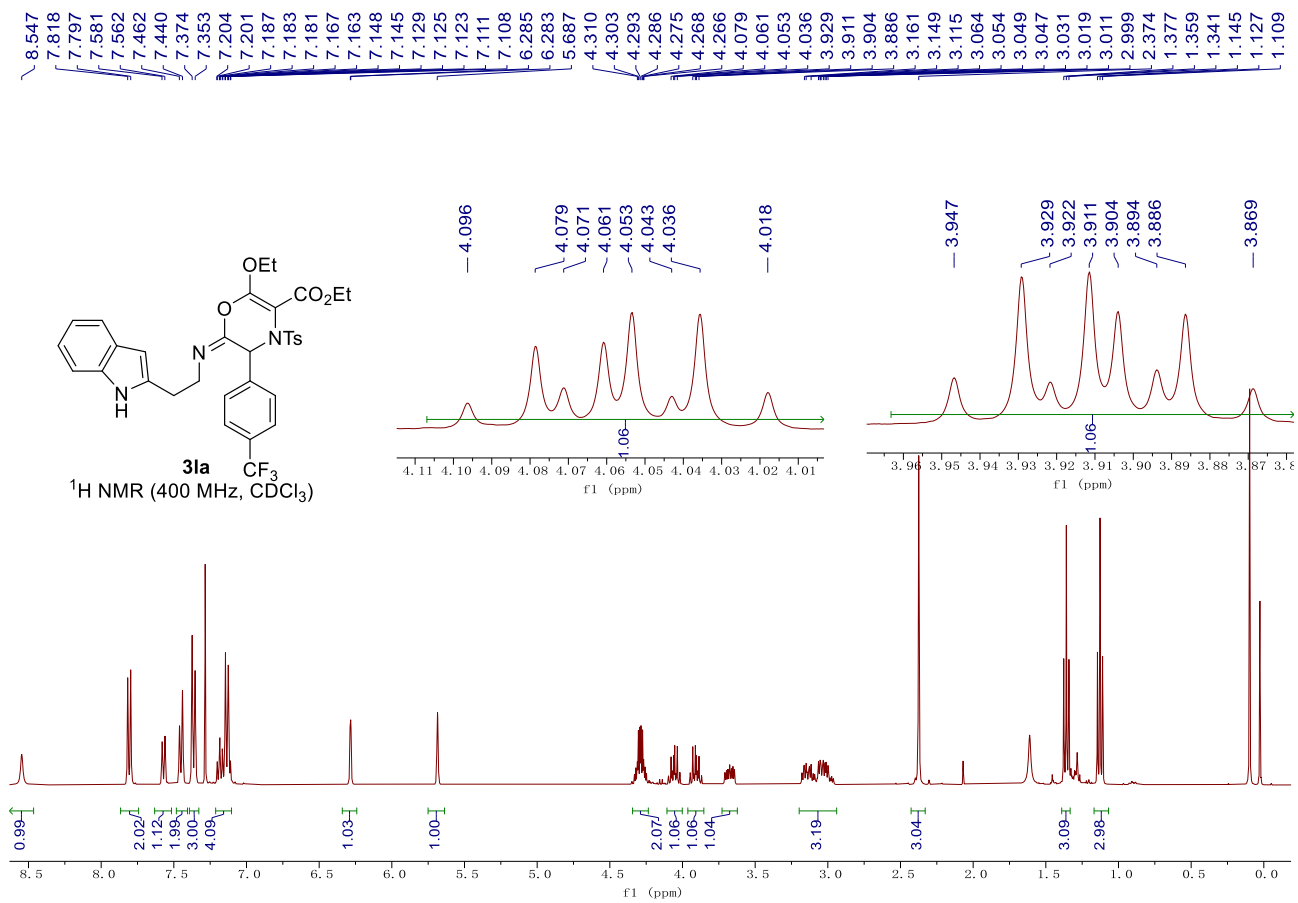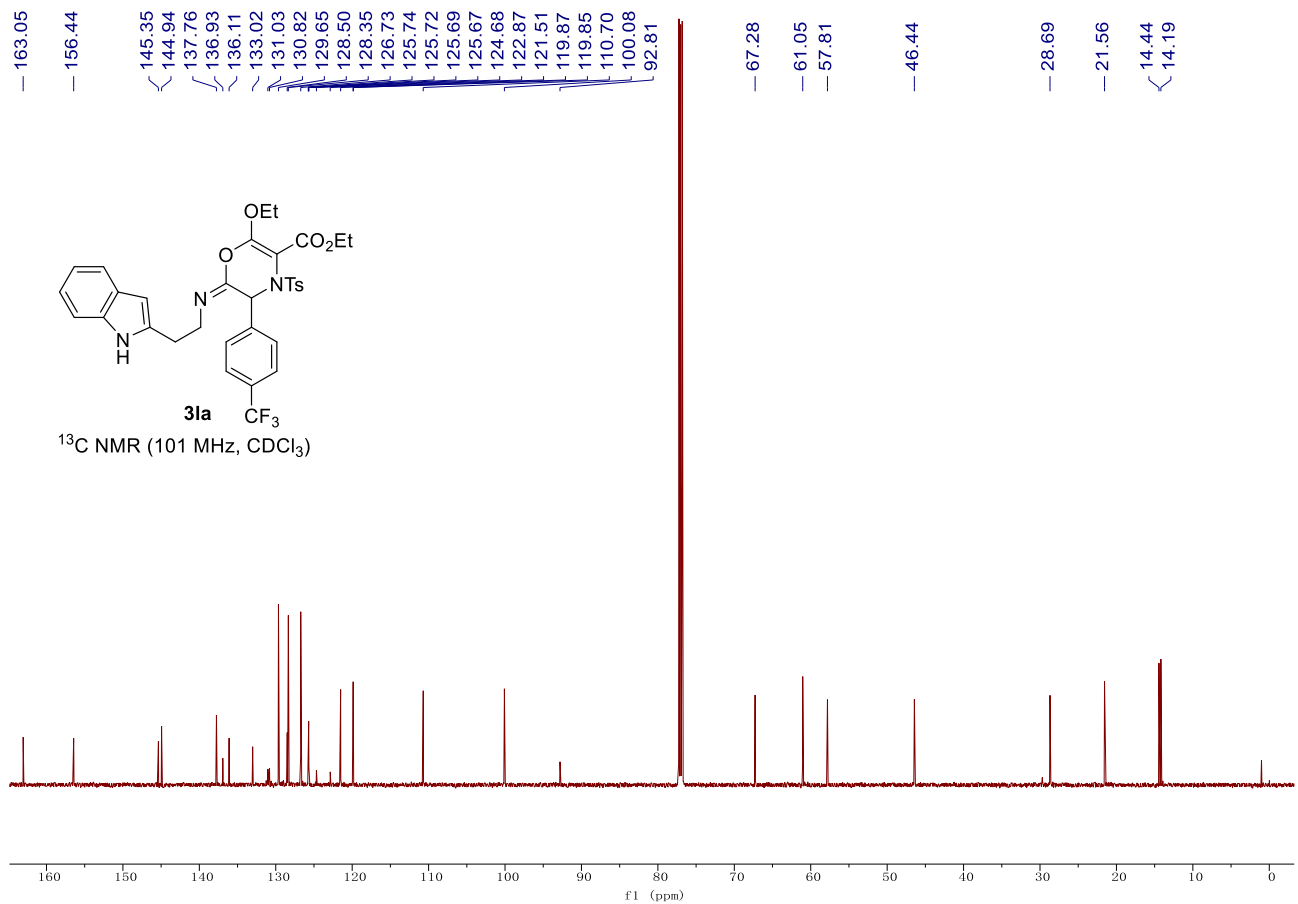

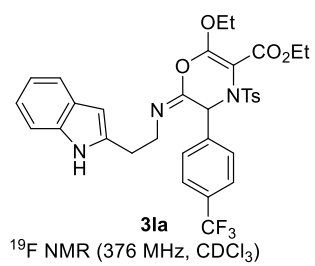

-62.80

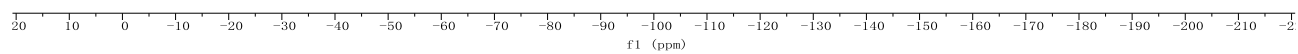

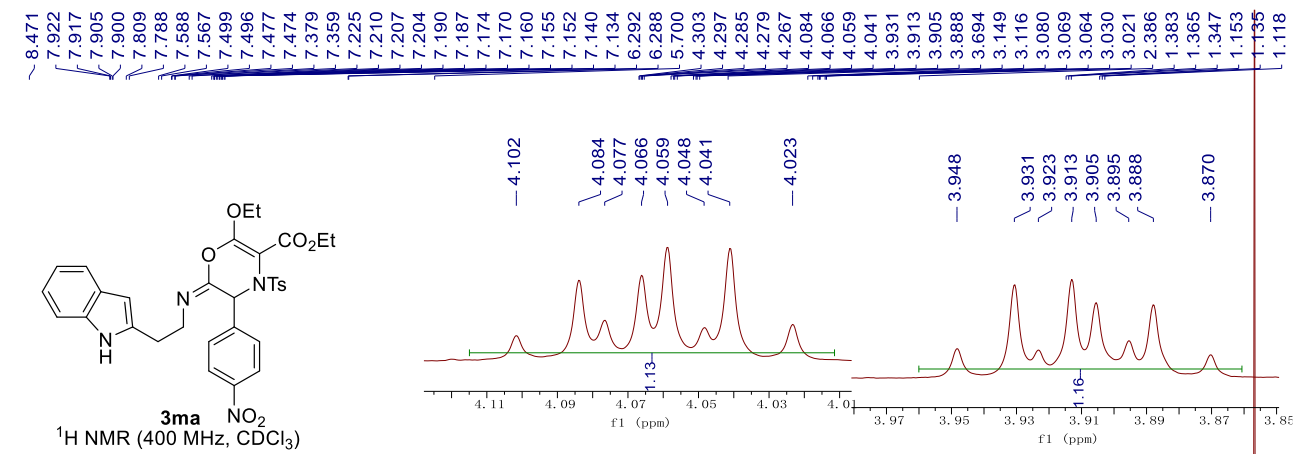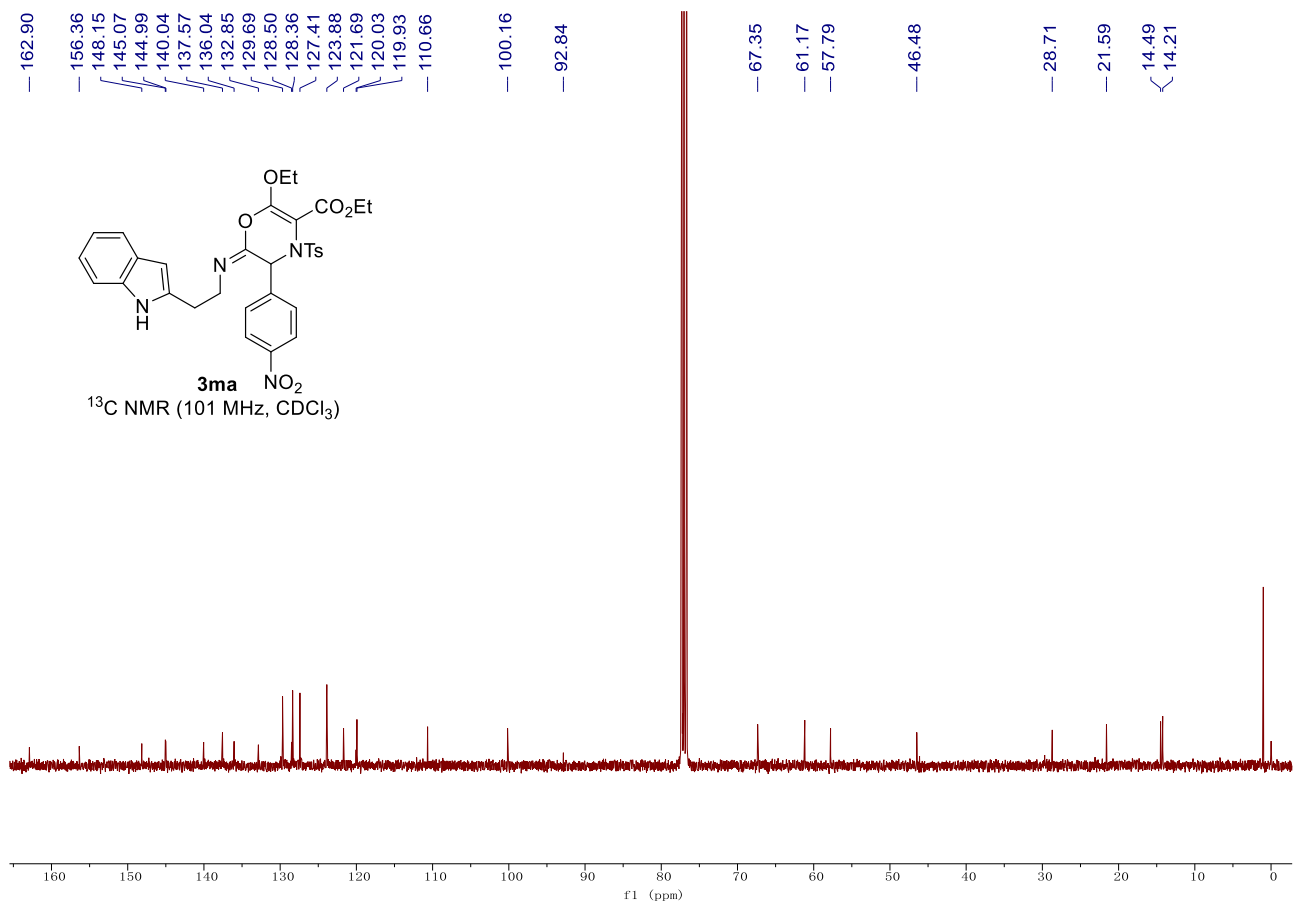

8.505  
7.793  
7.789  
7.777  
7.772  
7.574  
7.557  
7.554  
7.433  
7.430  
7.427  
7.411  
7.408  
7.368  
7.352  
7.347  
7.335  
7.331  
7.198  
7.195  
7.193  
7.179  
7.175  
7.160  
7.157  
7.153  
7.141  
7.138  
7.132  
7.123  
6.278  
6.272  
5.669  
4.306  
4.297  
4.288  
4.279  
4.271  
4.261  
4.077  
4.059  
4.052  
4.034  
3.925  
3.908  
3.900  
3.883  
3.094  
3.090  
3.061  
3.051  
3.046  
3.036  
3.025  
3.017  
3.008  
2.997  
2.993  
1.140  
1.122  
1.104

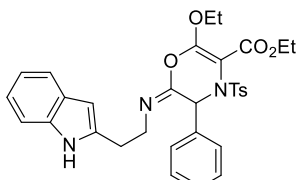

**3na**  
<sup>1</sup>H NMR (400 MHz, CDCl<sub>3</sub>)

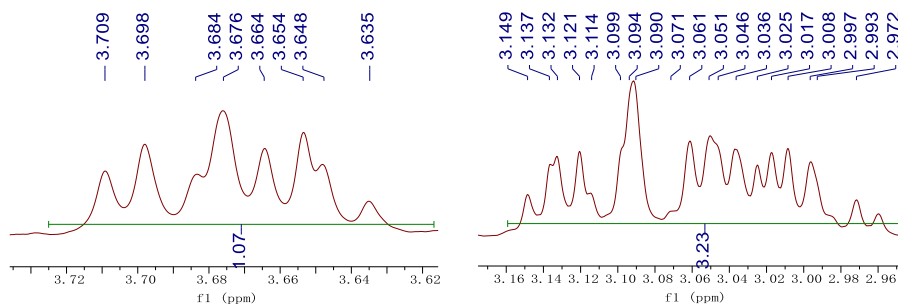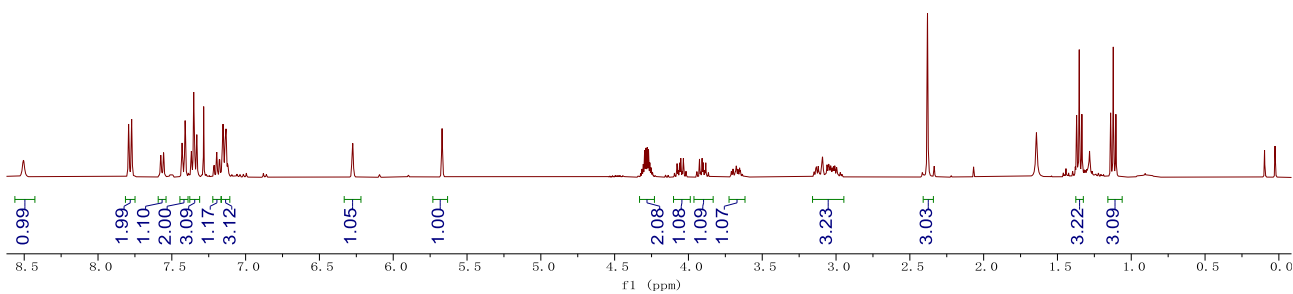

162.96  
156.38  
145.04  
144.96  
138.23  
137.64  
136.05  
132.85  
132.50  
129.68  
129.11  
128.51  
128.34  
127.12  
121.60  
119.96  
119.91  
118.20  
112.70  
110.67  
100.12  
92.82  
67.32  
61.13  
57.86  
46.43  
28.69  
21.59  
14.46  
14.21

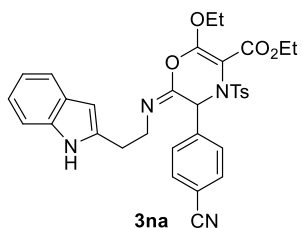

**3na**  
<sup>13</sup>C NMR (101 MHz, CDCl<sub>3</sub>)

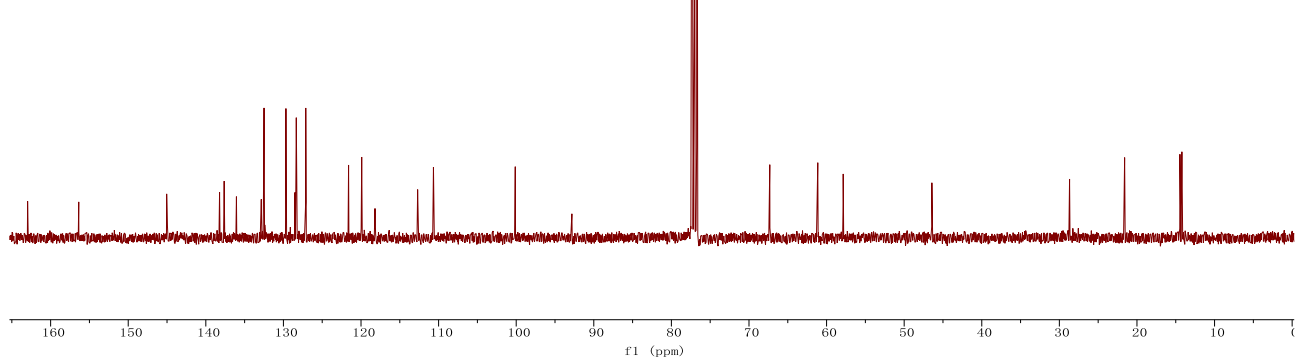

8.844  
8.821  
7.875  
7.855  
7.815  
7.795  
7.763  
7.759  
7.748  
7.743  
7.687  
7.587  
7.581  
7.577  
7.573  
7.570  
7.567  
7.563  
7.559  
7.258  
7.241  
7.238  
7.152  
7.148  
7.132  
7.127  
7.112  
7.109  
7.074  
7.054  
7.039  
7.022  
7.019  
7.001  
6.681  
6.663  
6.486  
6.264  
6.262  
4.186  
4.168  
4.042  
4.025  
3.771  
3.771  
3.753  
3.736  
3.736  
3.709  
3.009  
2.994  
2.982  
2.976  
2.388  
2.070  
1.631  
1.288  
1.271  
1.253  
0.711  
0.693  
0.675

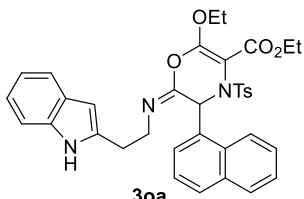

<sup>1</sup>H NMR (400 MHz, CDCl<sub>3</sub>)

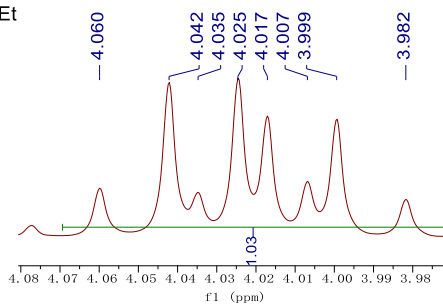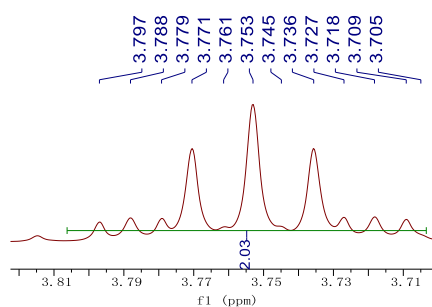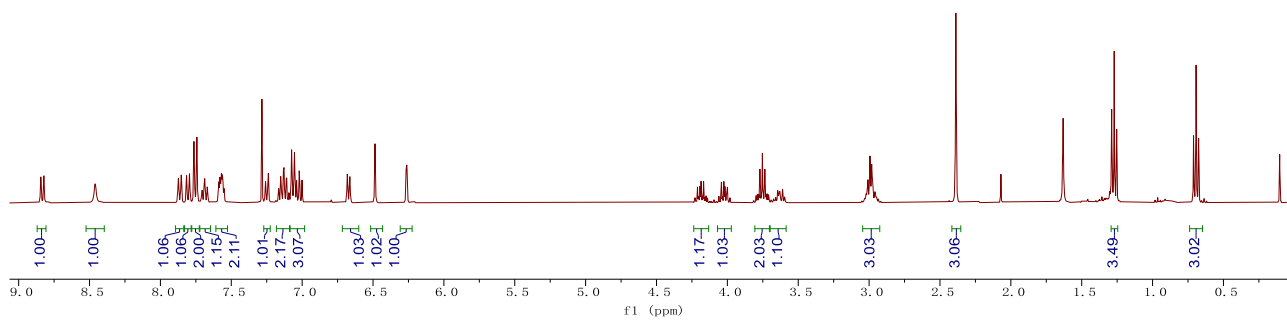

162.96  
157.76  
146.94  
144.64  
138.06  
136.05  
134.08  
132.71  
131.28  
130.26  
129.47  
128.72  
128.46  
128.38  
128.36  
126.81  
126.26  
125.14  
124.37  
124.25  
124.25  
121.36  
119.78  
119.74  
110.76  
99.99  
92.12

67.29  
60.13  
57.21  
46.44  
28.58  
21.57  
14.92  
13.37

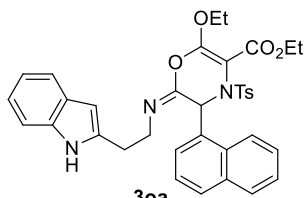

<sup>13</sup>C NMR (101 MHz, CDCl<sub>3</sub>)

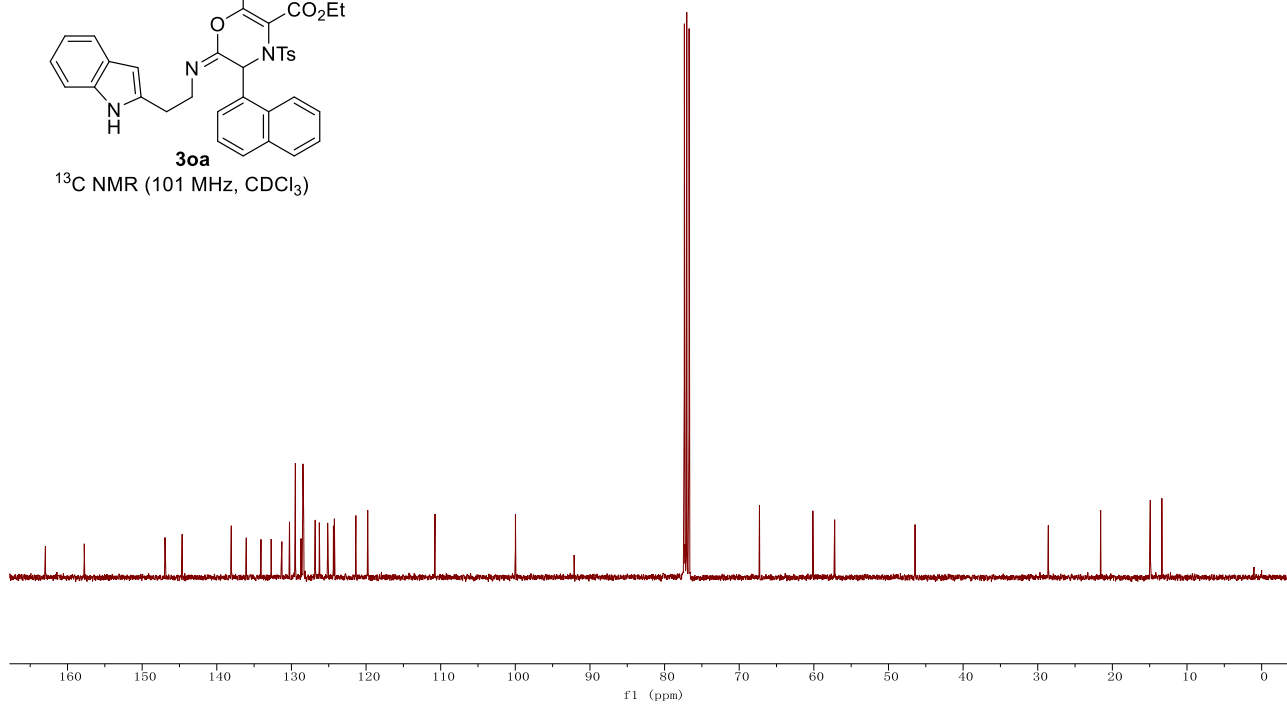

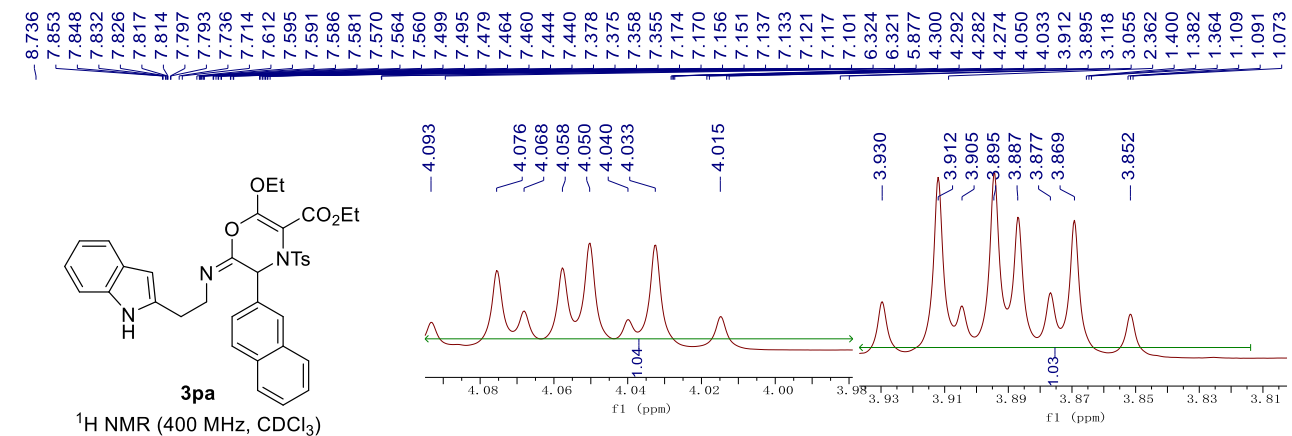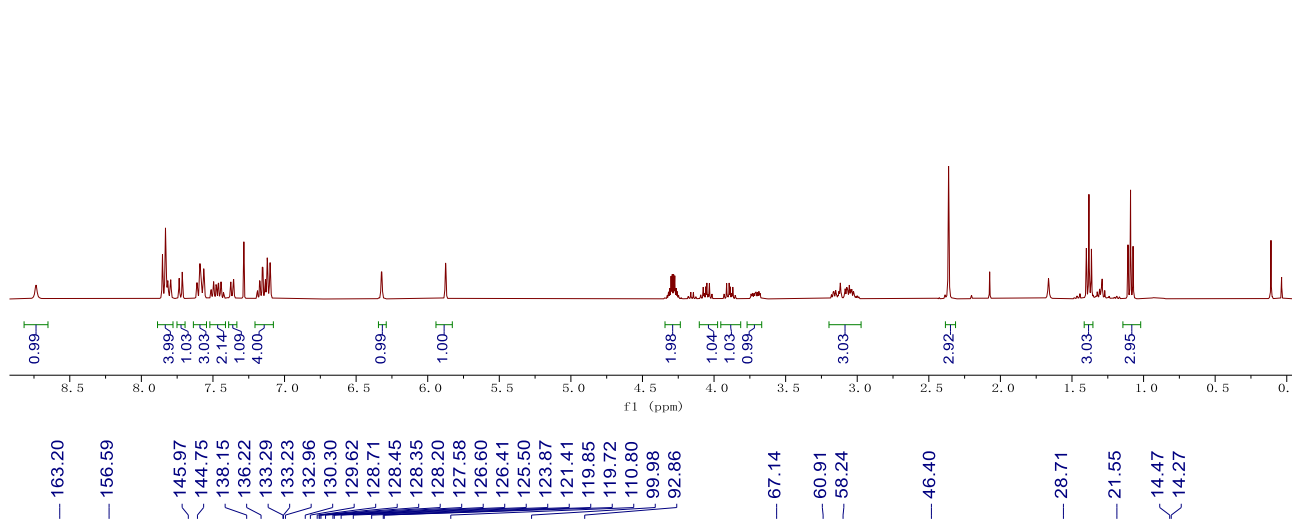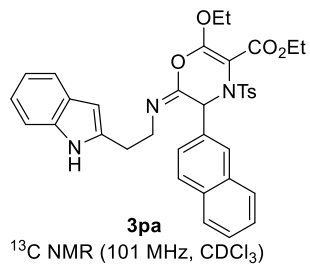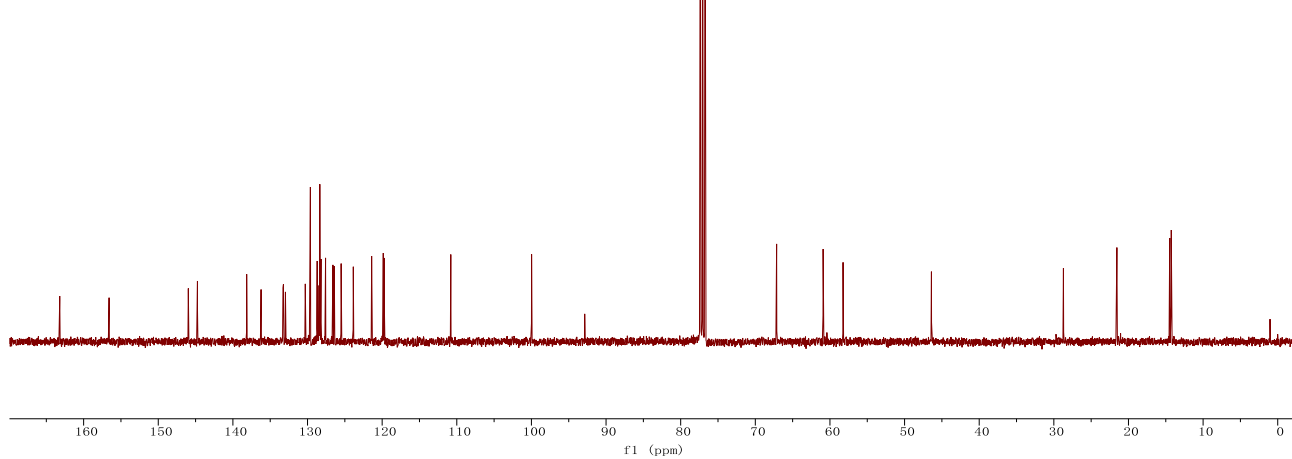

8.750  
7.896  
7.892  
7.880  
7.876  
7.736  
7.721  
7.713  
7.605  
7.601  
7.586  
7.582  
7.533  
7.525  
7.510  
7.381  
7.363  
7.360  
7.336  
7.330  
7.327  
7.323  
7.320  
7.313  
7.270  
7.266  
7.185  
7.183  
7.179  
7.163  
7.159  
7.155  
7.151  
7.136  
7.133  
6.311  
6.308  
5.919  
5.915  
4.350  
4.338  
4.332  
4.320  
4.093  
4.075  
3.967  
3.950  
3.942  
3.081  
3.073  
3.067  
3.060  
2.391  
1.416  
1.398  
1.381  
1.189  
1.172  
1.154

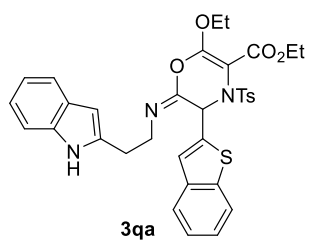

<sup>1</sup>H NMR (400 MHz, CDCl<sub>3</sub>)

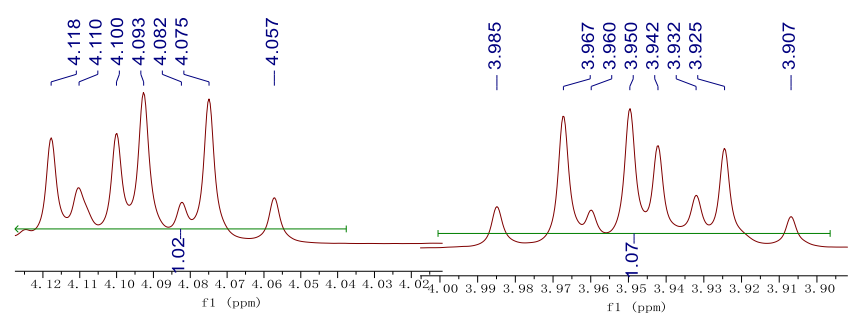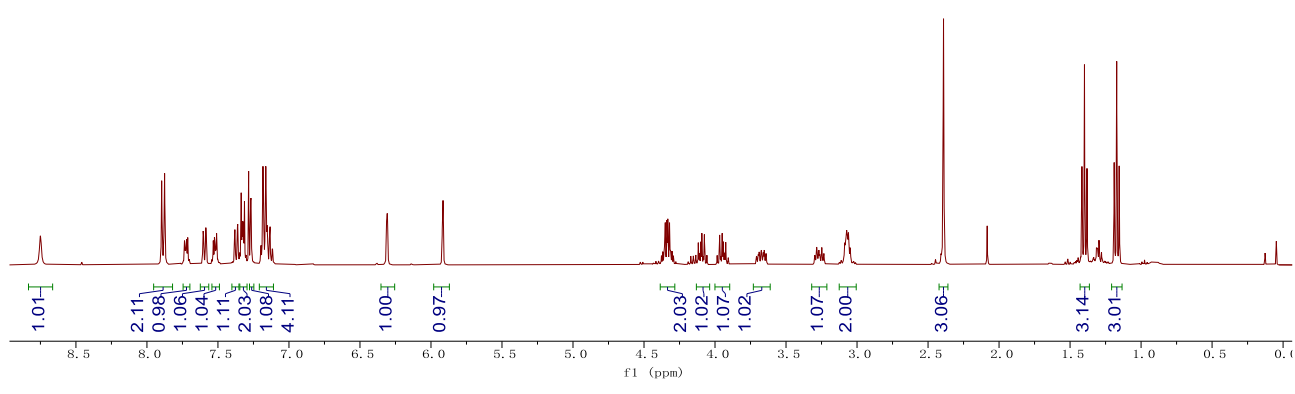

163.19  
156.78  
145.95  
145.03  
139.93  
139.19  
138.07  
137.40  
136.25  
133.00  
129.69  
128.50  
128.46  
124.83  
124.52  
123.91  
123.12  
122.28  
121.36  
119.83  
119.69  
110.83  
99.98  
92.36  
67.22  
60.98  
55.92  
46.61  
28.66  
21.61  
14.55  
14.29

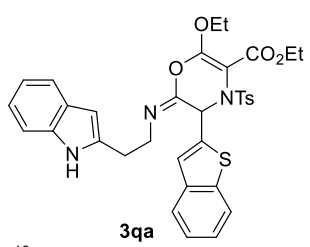

<sup>13</sup>C NMR (101 MHz, CDCl<sub>3</sub>)

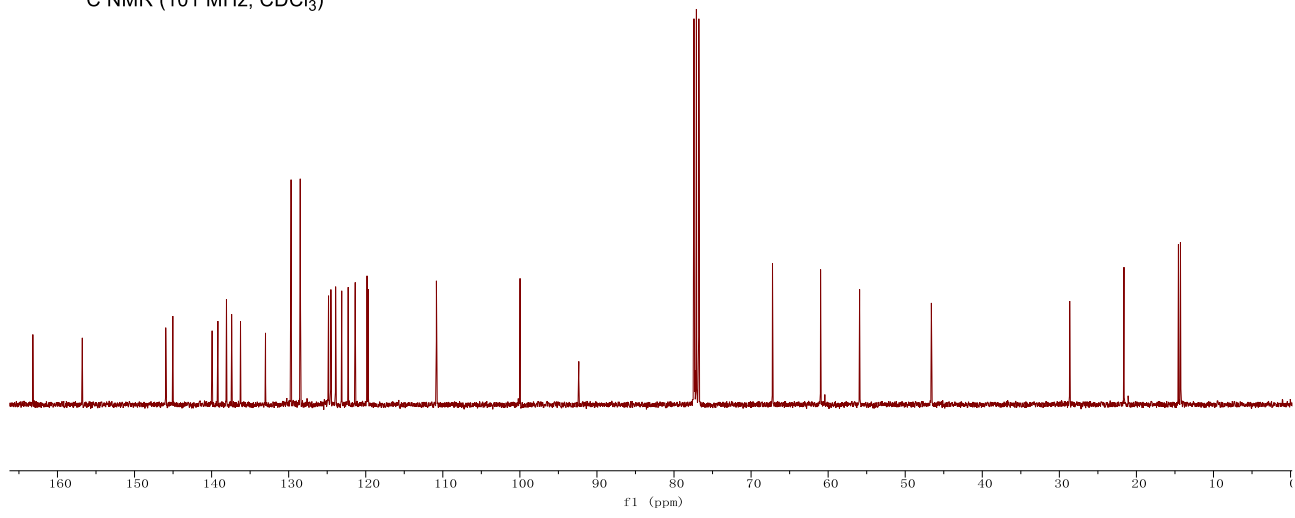



11.067  
11.062  
7.684  
7.680  
7.668  
7.664  
7.567  
7.563  
7.558  
7.549  
7.545  
7.543  
7.471  
7.453  
7.448  
7.433  
7.427  
7.407  
7.388  
7.385  
7.381  
7.366  
7.318  
7.306  
7.296  
7.284  
7.273  
7.269  
7.258  
7.252  
7.245  
7.226  
7.219  
7.137  
7.117  
6.883  
6.877  
6.227  
6.222  
5.543  
4.136  
4.118  
4.109  
4.100  
3.982  
3.982  
3.973  
3.964  
3.956  
3.732  
2.969  
2.951  
2.941  
2.404  
1.234  
1.216  
1.198  
0.979  
0.961  
0.944

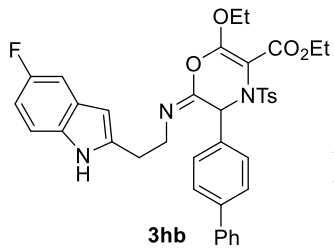

<sup>1</sup>H NMR (400 MHz, DMSO-*d*<sub>6</sub>)

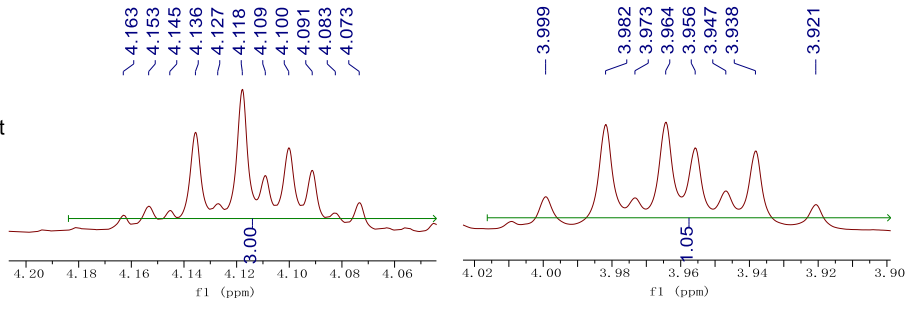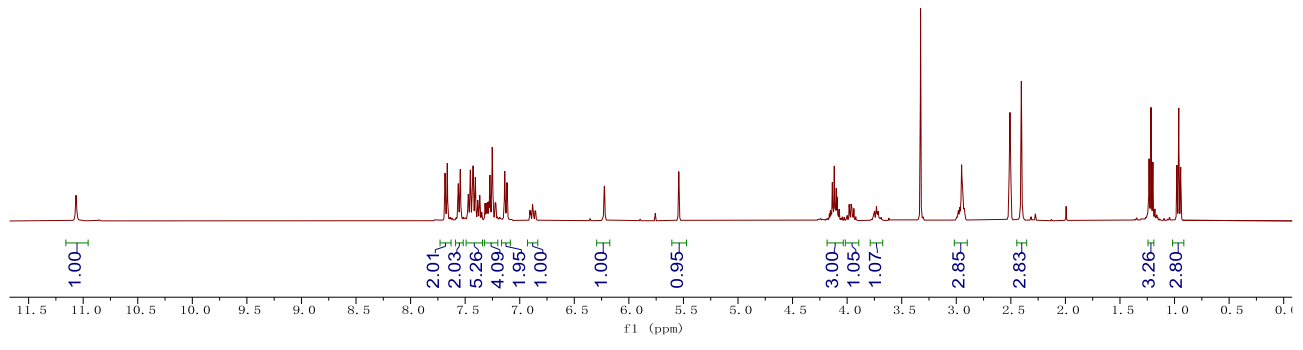

162.88  
158.61  
156.74  
156.32  
145.40  
144.10  
140.69  
140.56  
139.49  
133.24  
132.78  
132.29  
130.34  
129.59  
129.40  
129.19  
129.09  
128.28  
128.22  
128.22  
127.06  
126.97  
112.09  
111.99  
108.73  
108.47  
104.55  
104.32  
100.12  
100.07  
92.23

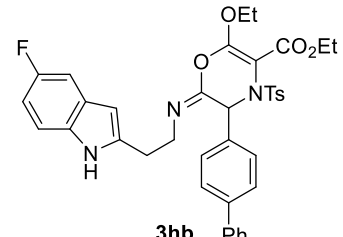

<sup>13</sup>C NMR (101 MHz, DMSO-*d*<sub>6</sub>)

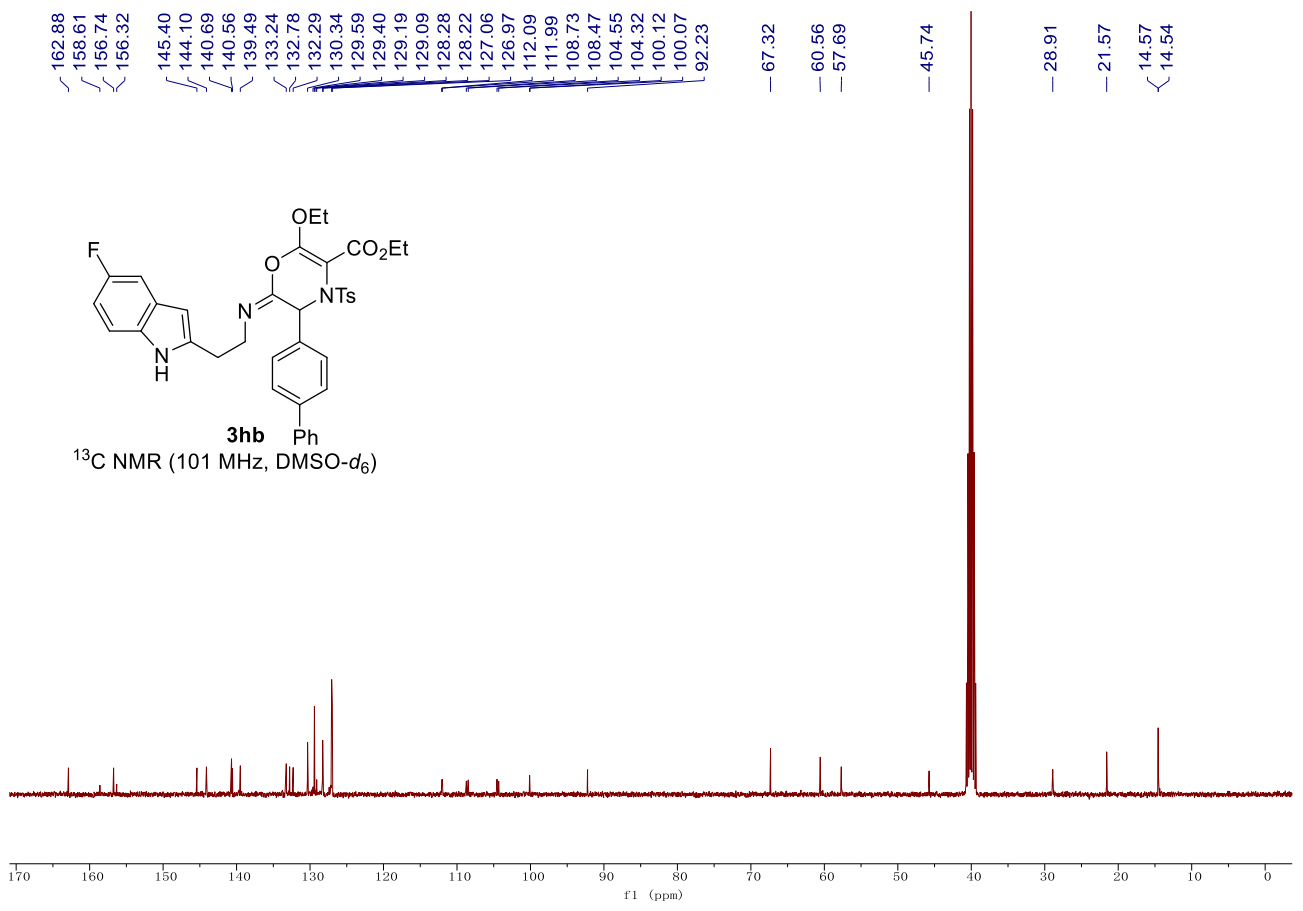

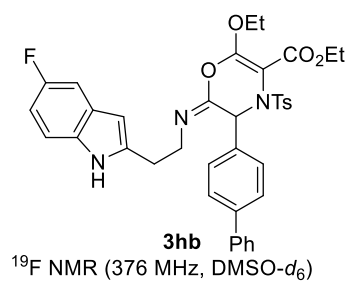

— -125.70

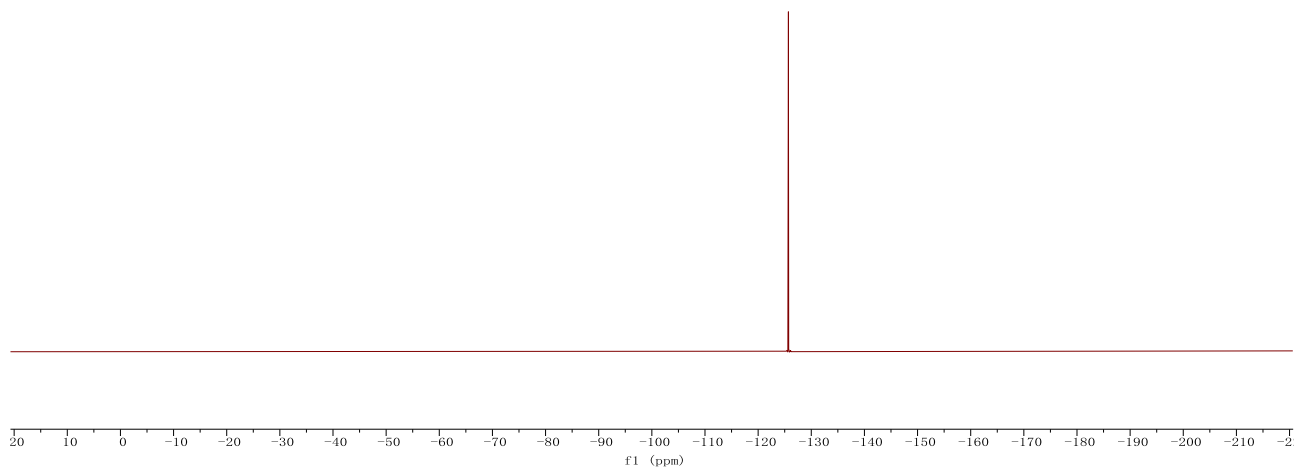

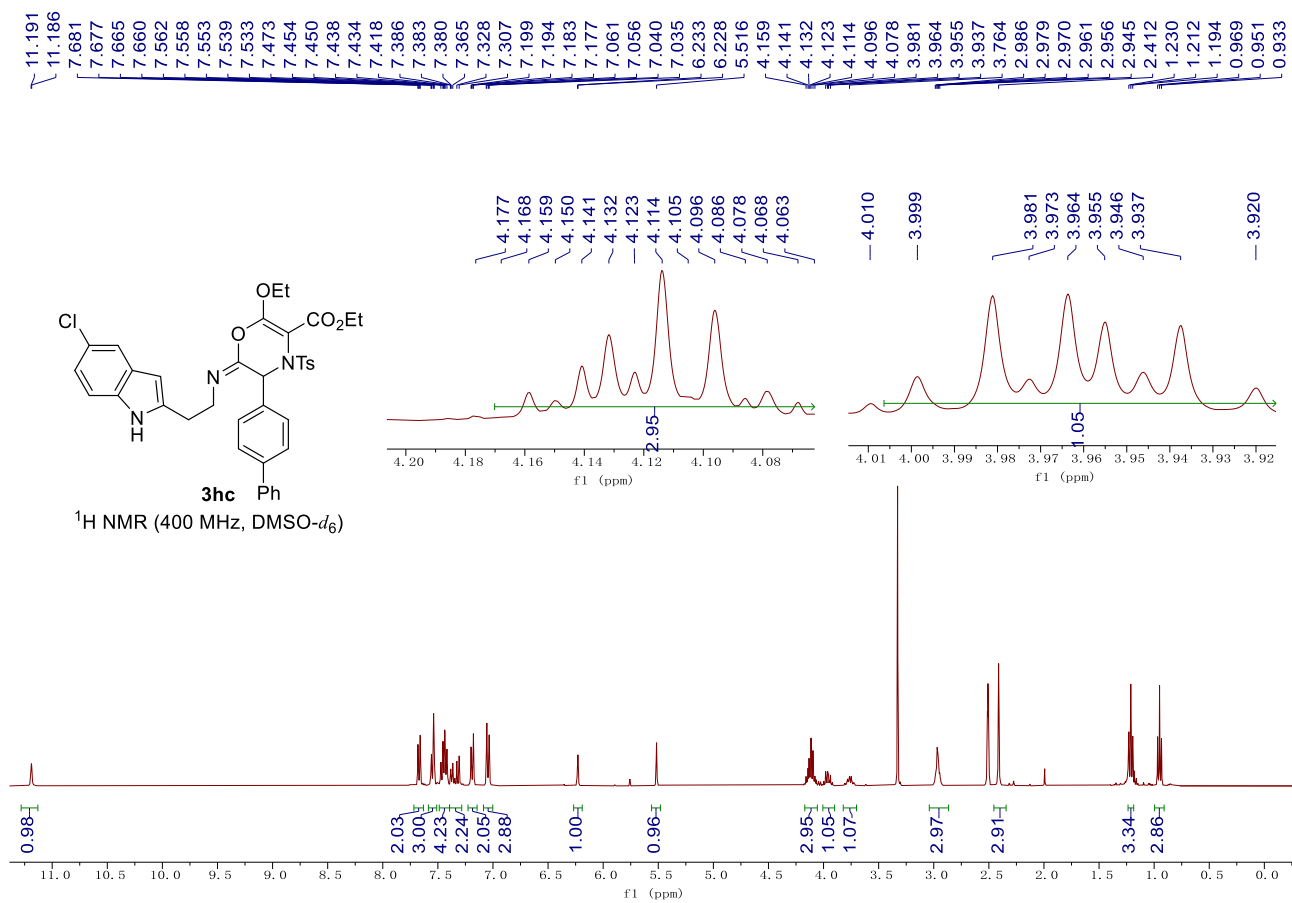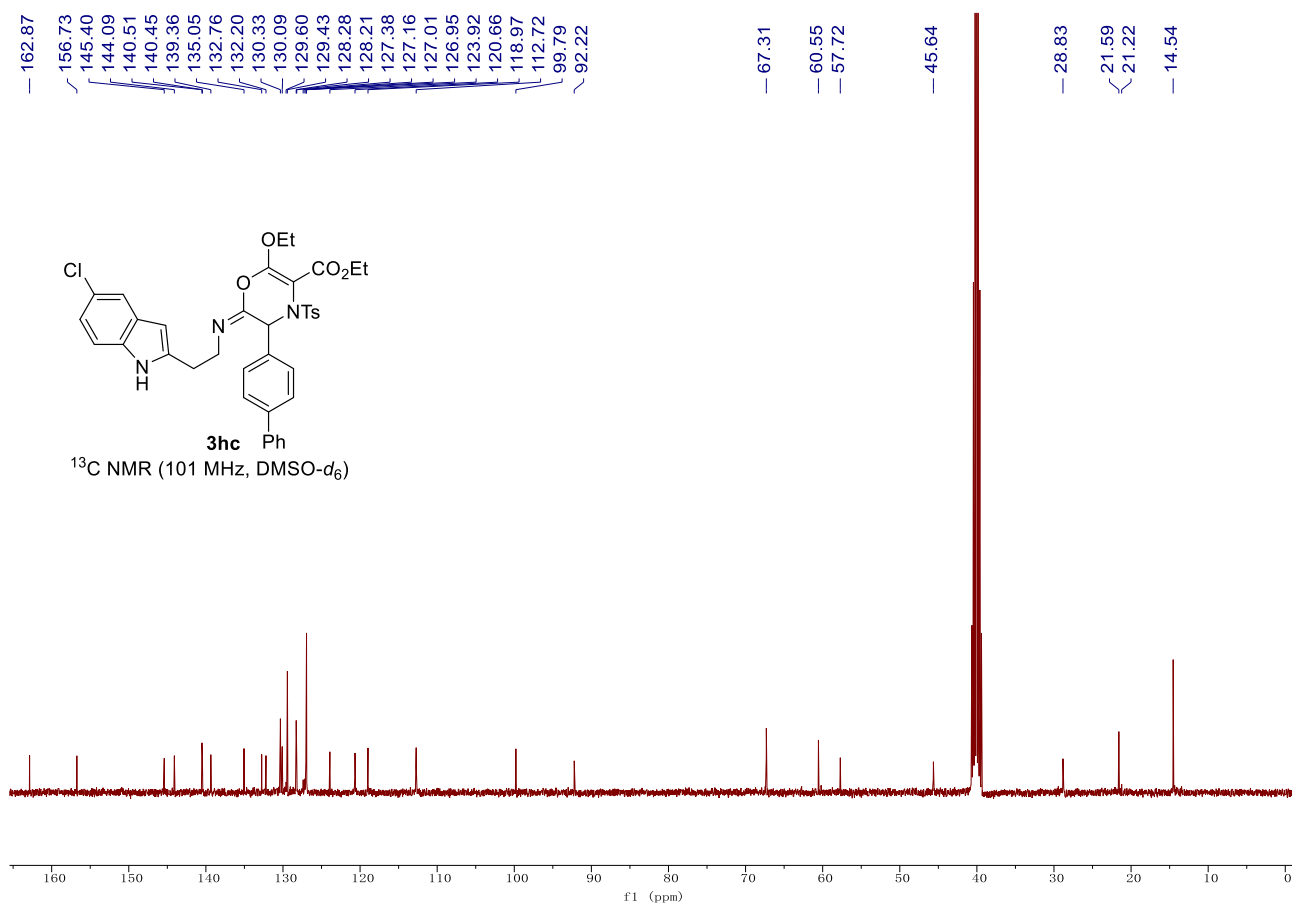

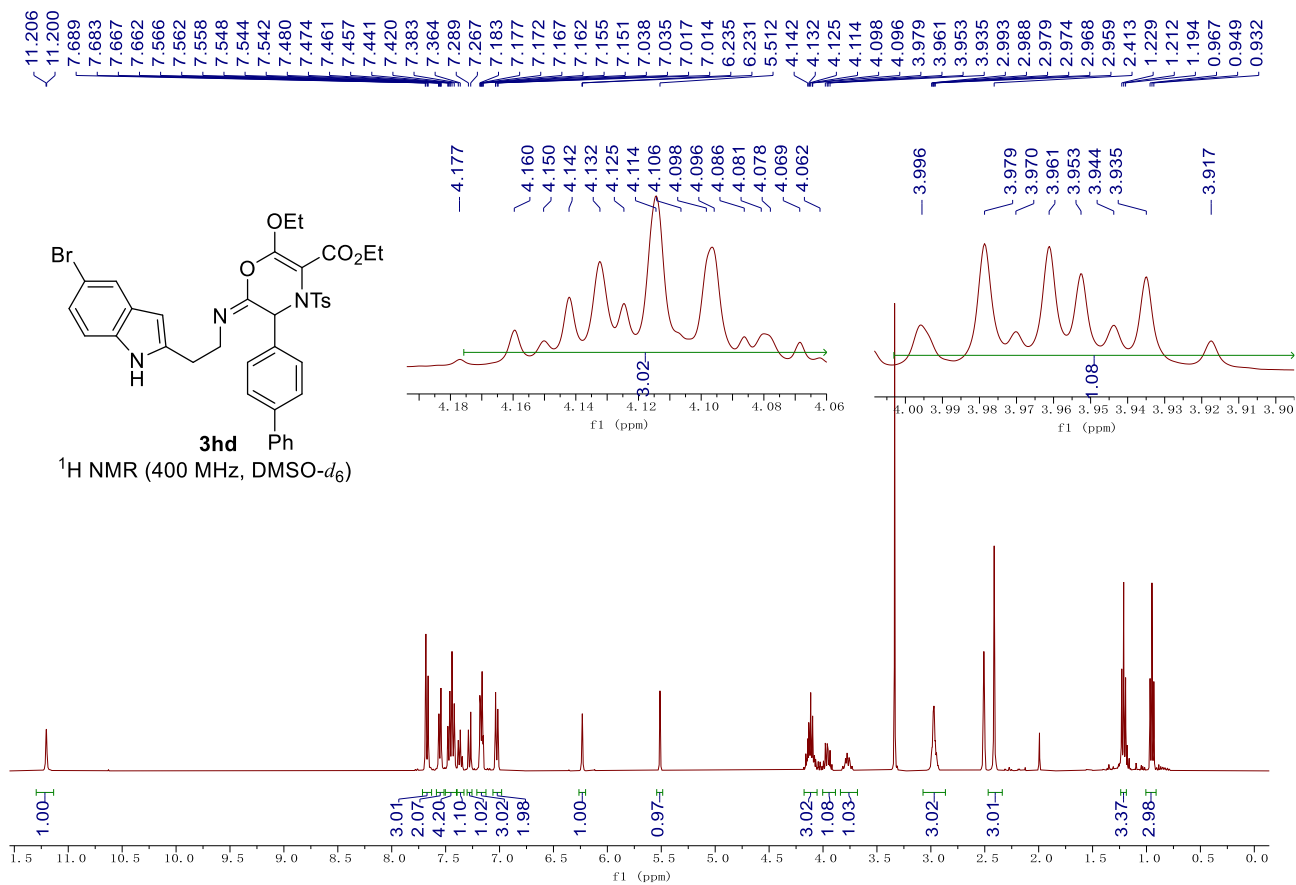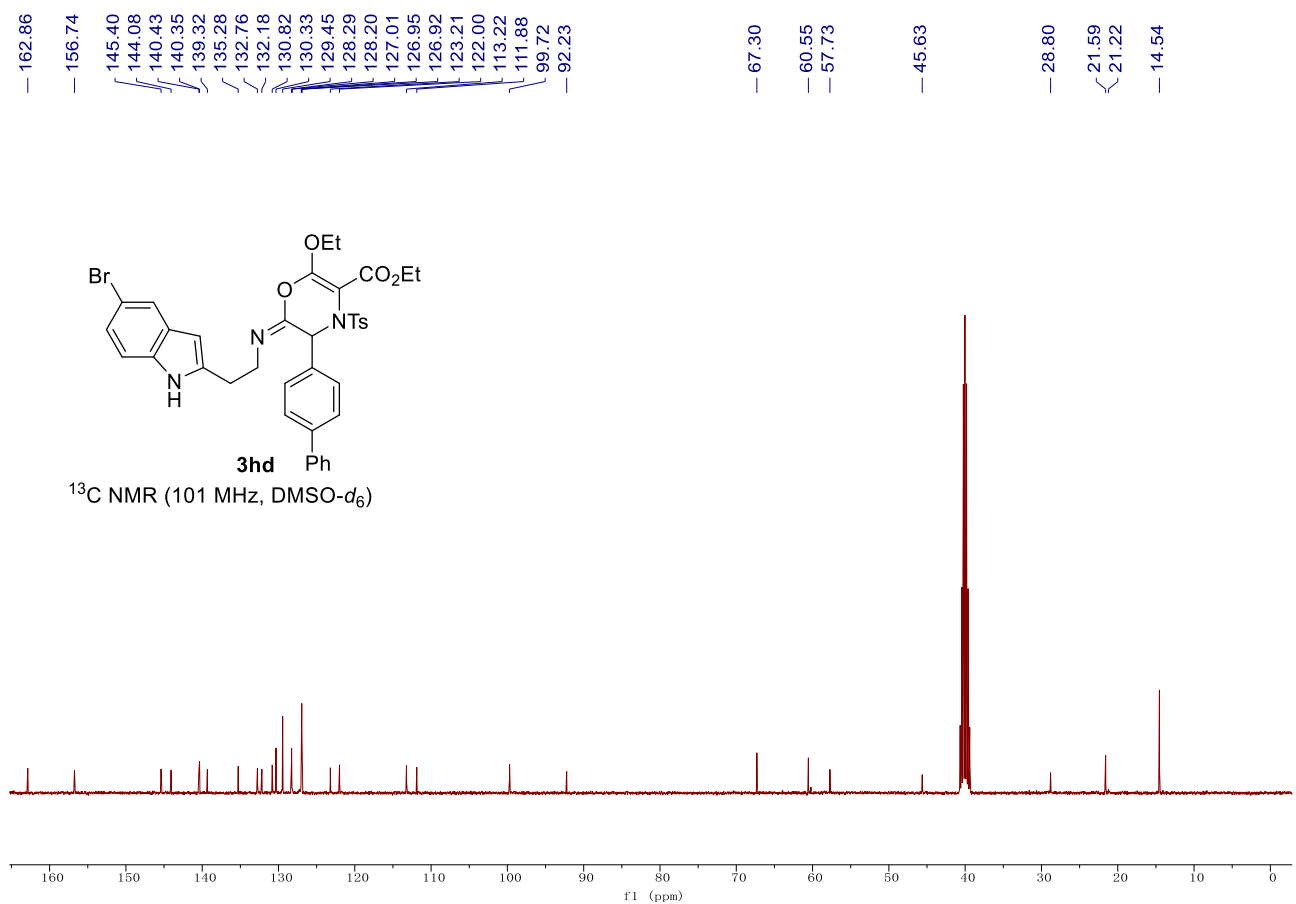

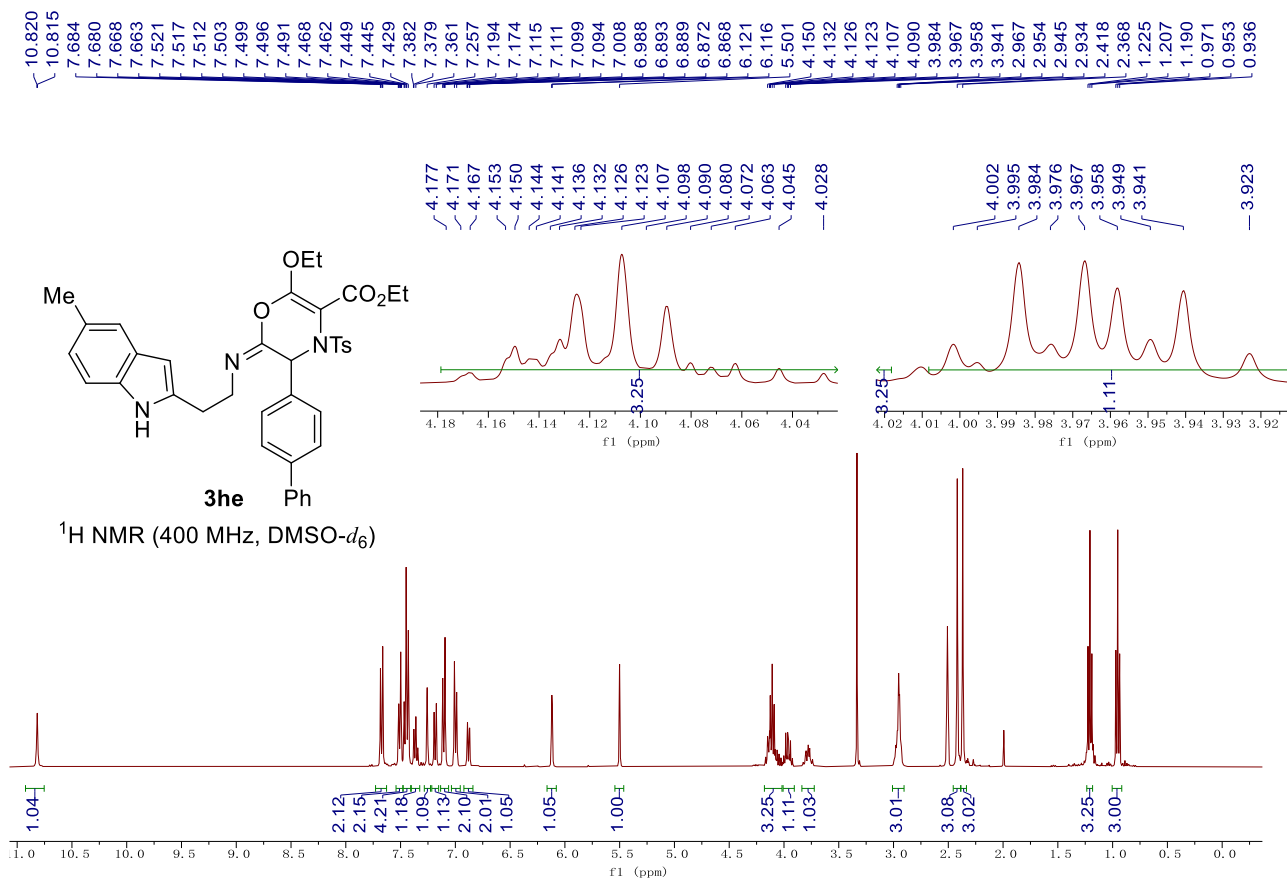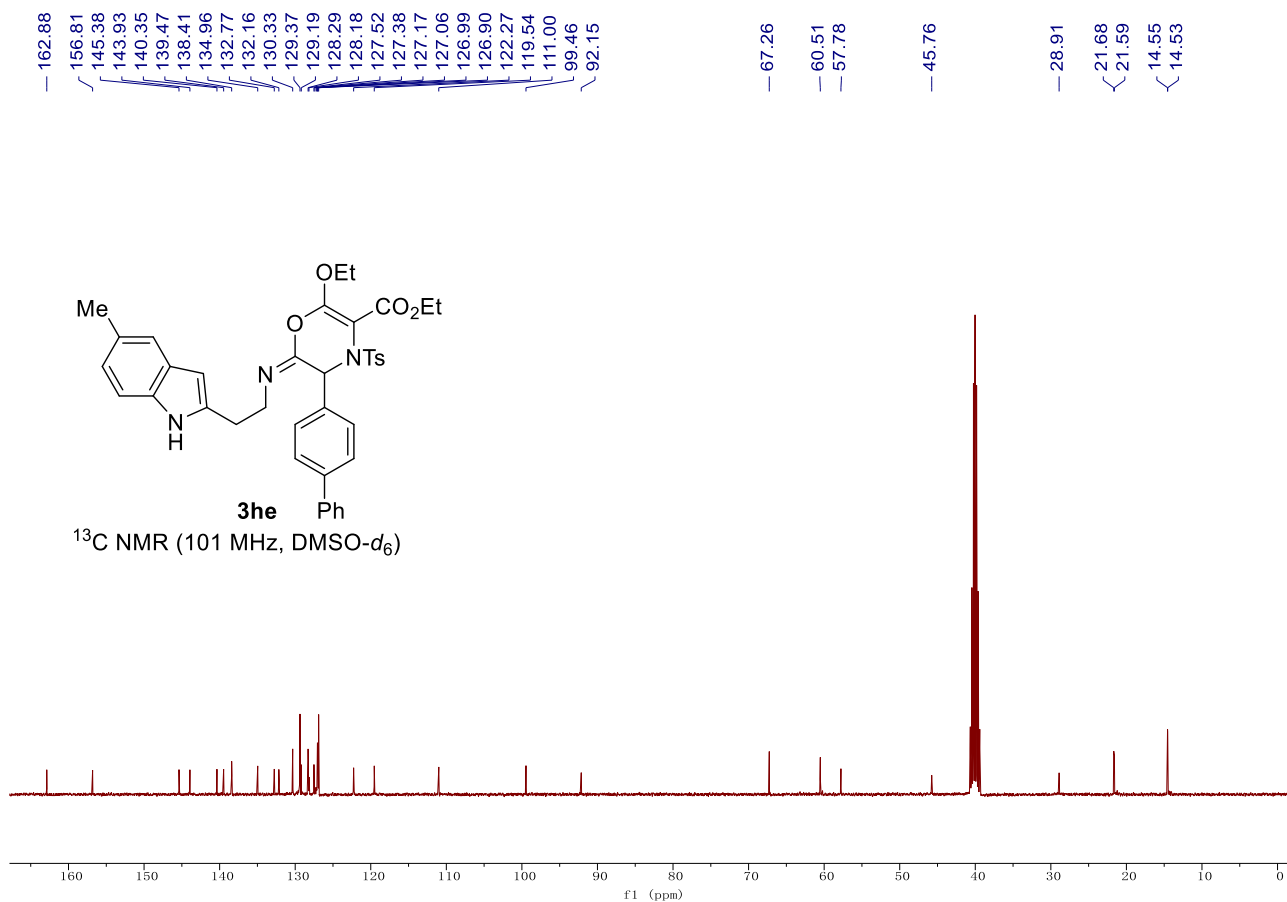

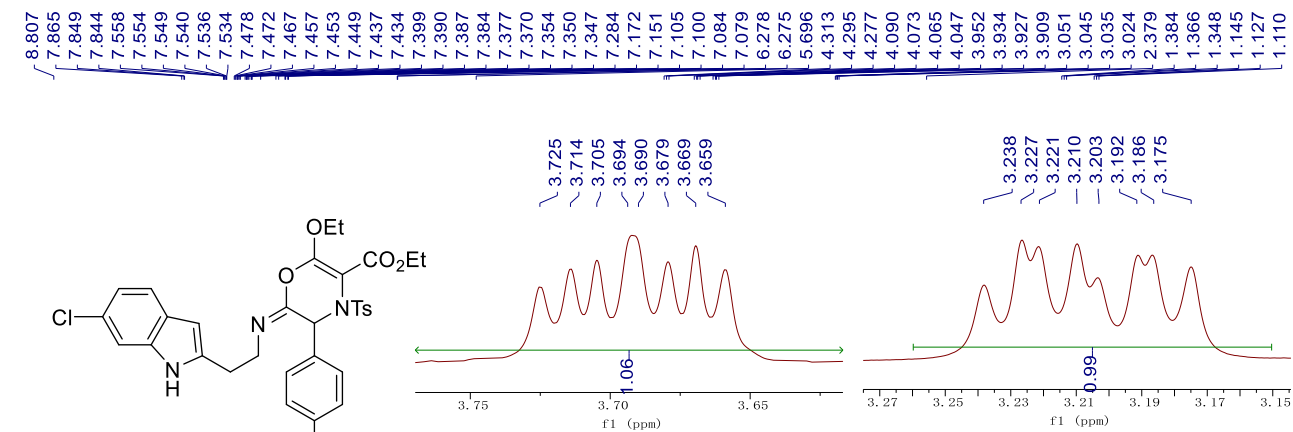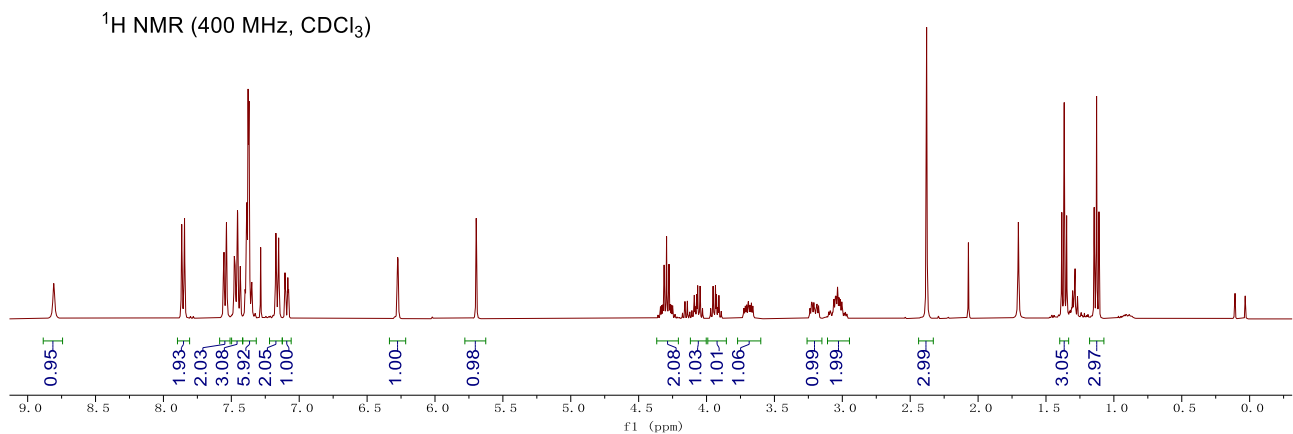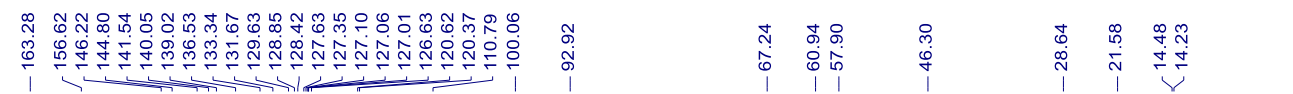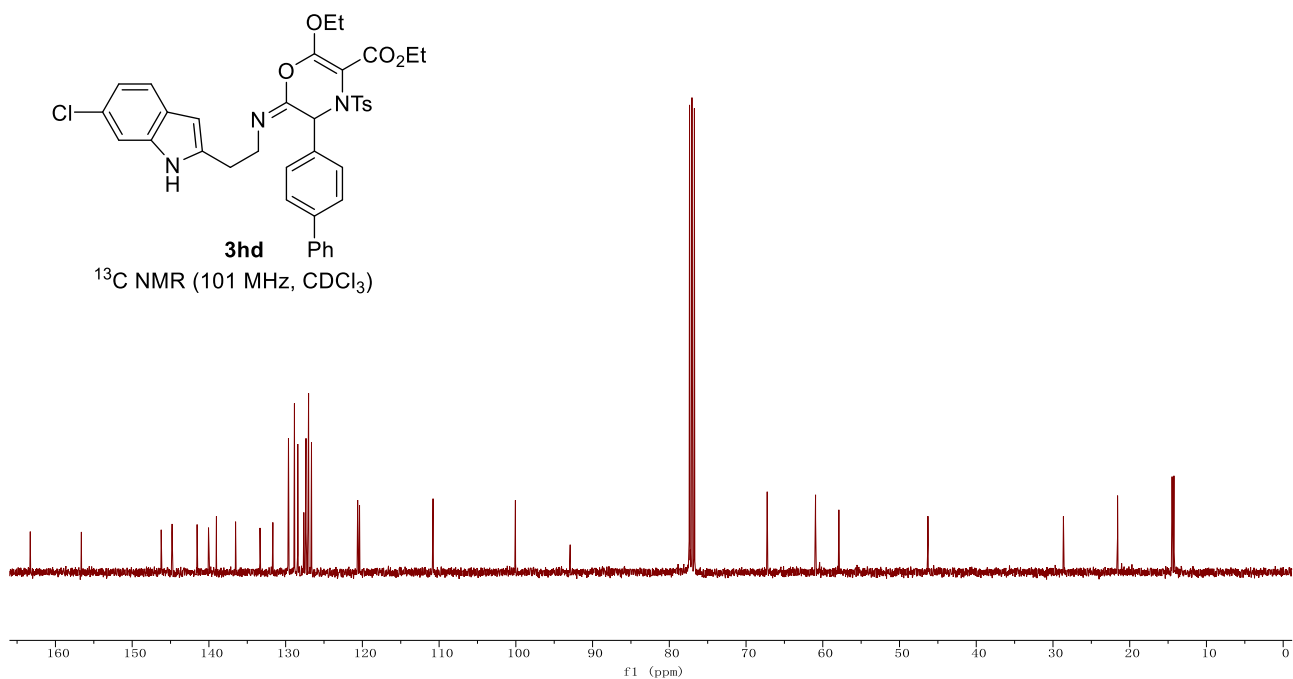

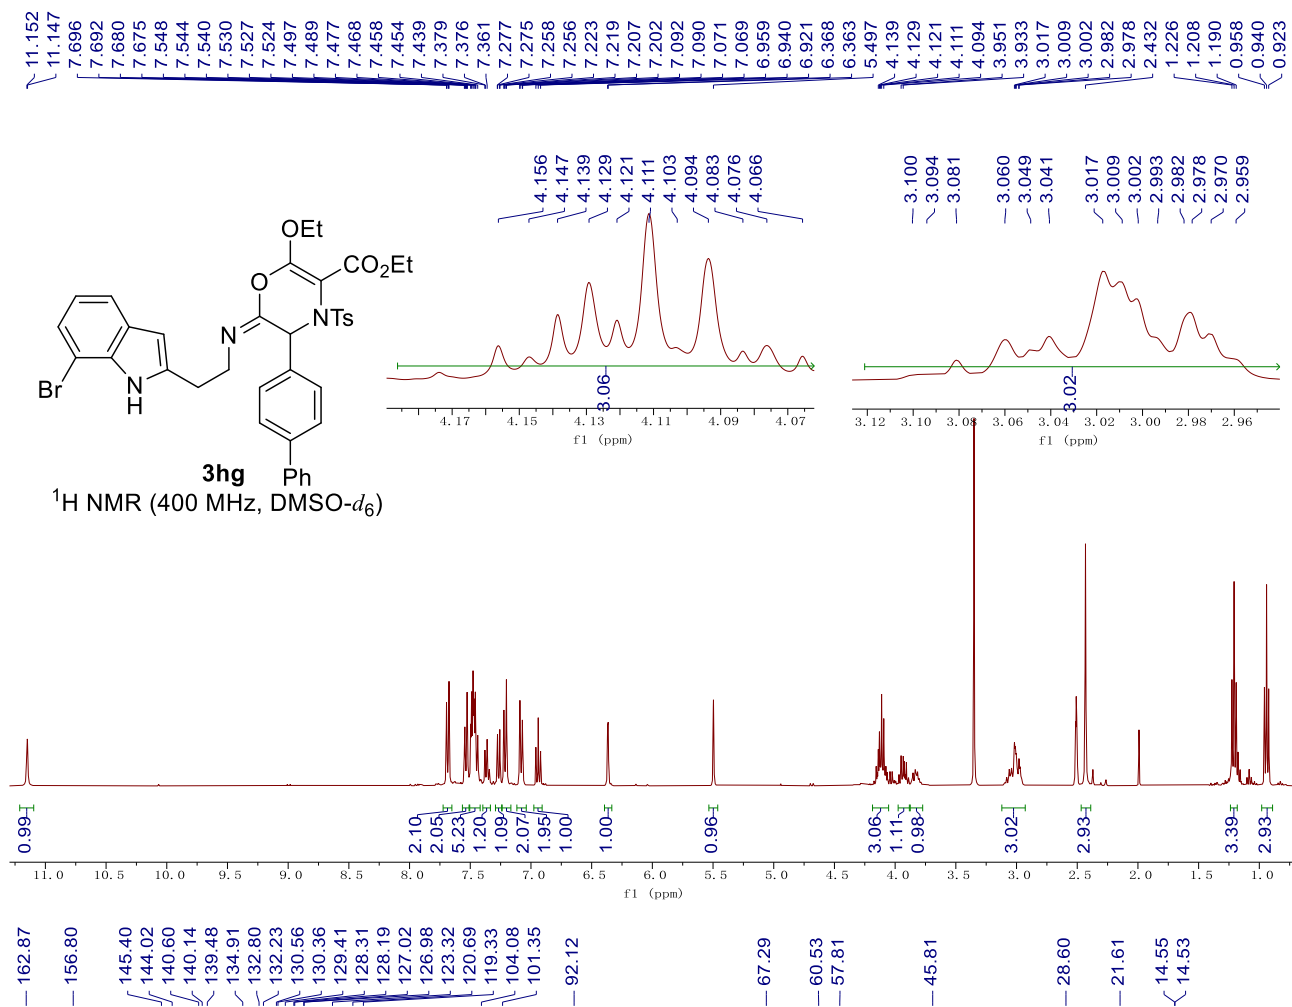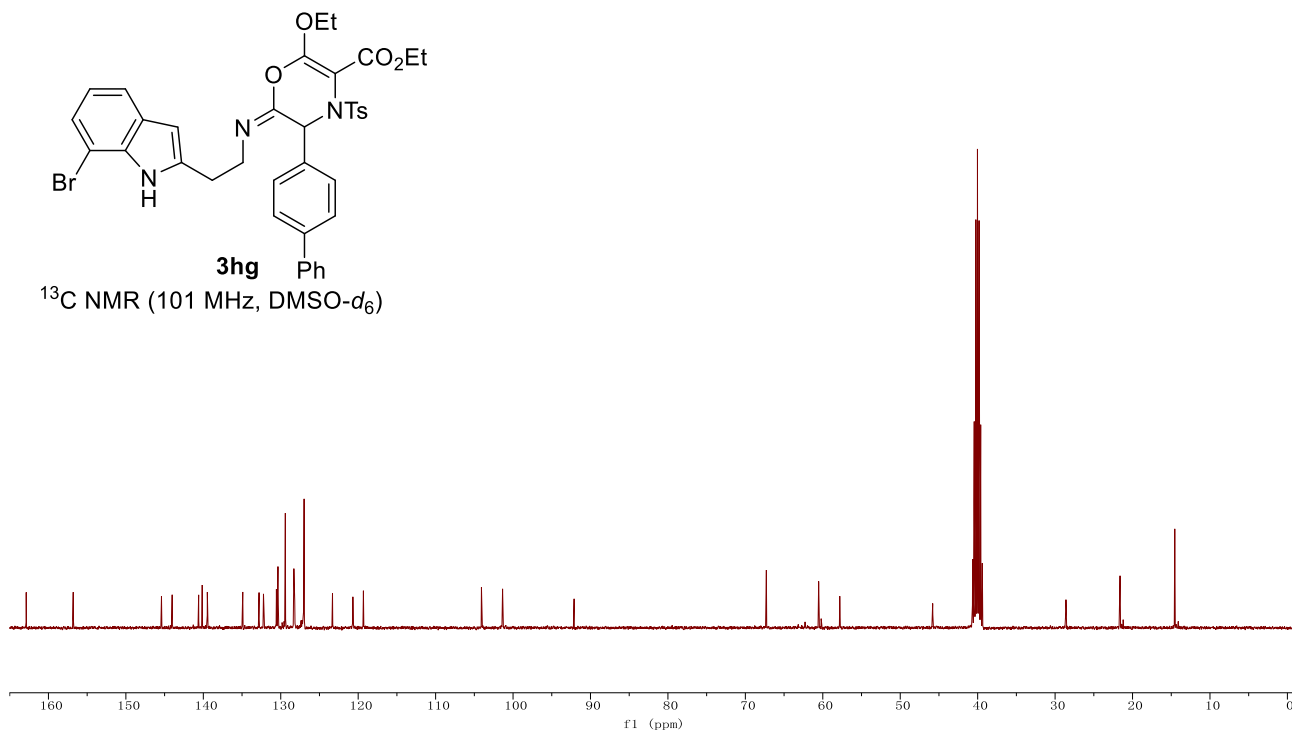

8.832  
7.858  
7.853  
7.842  
7.837  
7.645  
7.626  
7.610  
7.597  
7.591  
7.588  
7.583  
7.578  
7.565  
7.558  
7.548  
7.543  
7.510  
7.507  
7.490  
7.487  
7.481  
7.463  
7.463  
7.459  
7.448  
7.444  
7.401  
7.383  
7.238  
7.235  
7.218  
7.214  
7.189  
7.186  
7.169  
7.150  
6.335  
5.849  
4.676  
4.633  
4.363  
4.352  
4.345  
4.334  
4.302  
4.200  
4.192  
4.175  
4.077  
4.059  
4.052  
4.034  
2.309  
1.424  
1.406  
1.388  
1.224  
1.206  
1.189

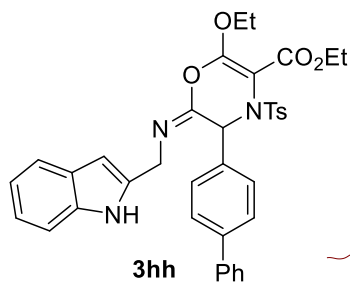

<sup>1</sup>H NMR (400 MHz, CDCl<sub>3</sub>)

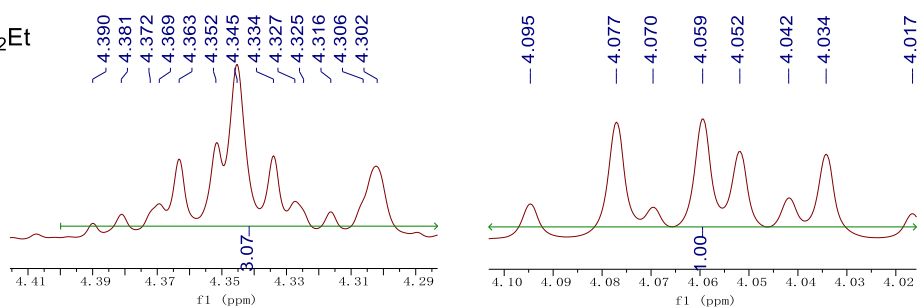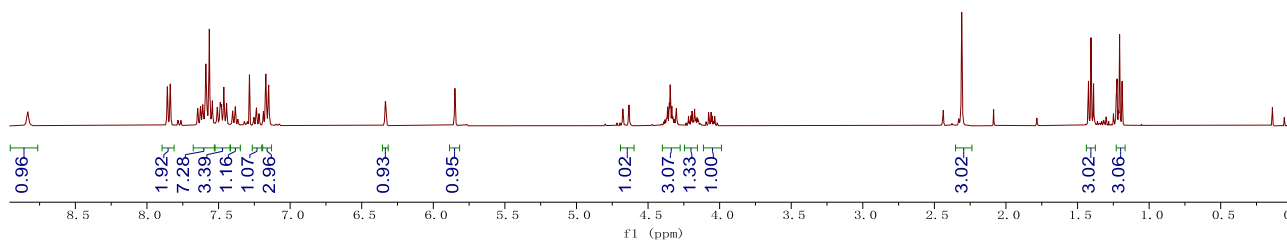

163.25  
156.61  
146.57  
145.02  
141.65  
140.21  
135.99  
135.54  
132.89  
131.80  
129.65  
128.88  
128.68  
128.45  
128.45  
127.67  
127.44  
127.07  
126.78  
121.57  
120.14  
120.14  
119.87  
111.08  
99.01  
93.23

67.48  
61.01  
57.93  
43.76  
21.58  
14.55  
14.29

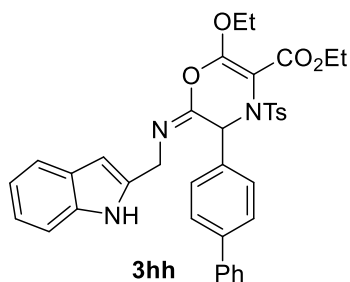

<sup>13</sup>C NMR (101 MHz, CDCl<sub>3</sub>)

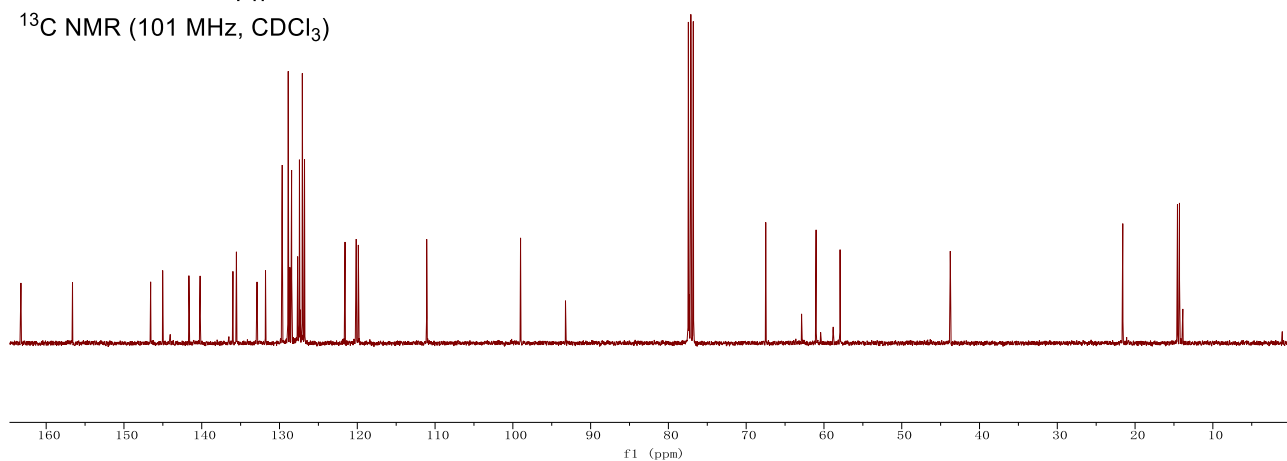



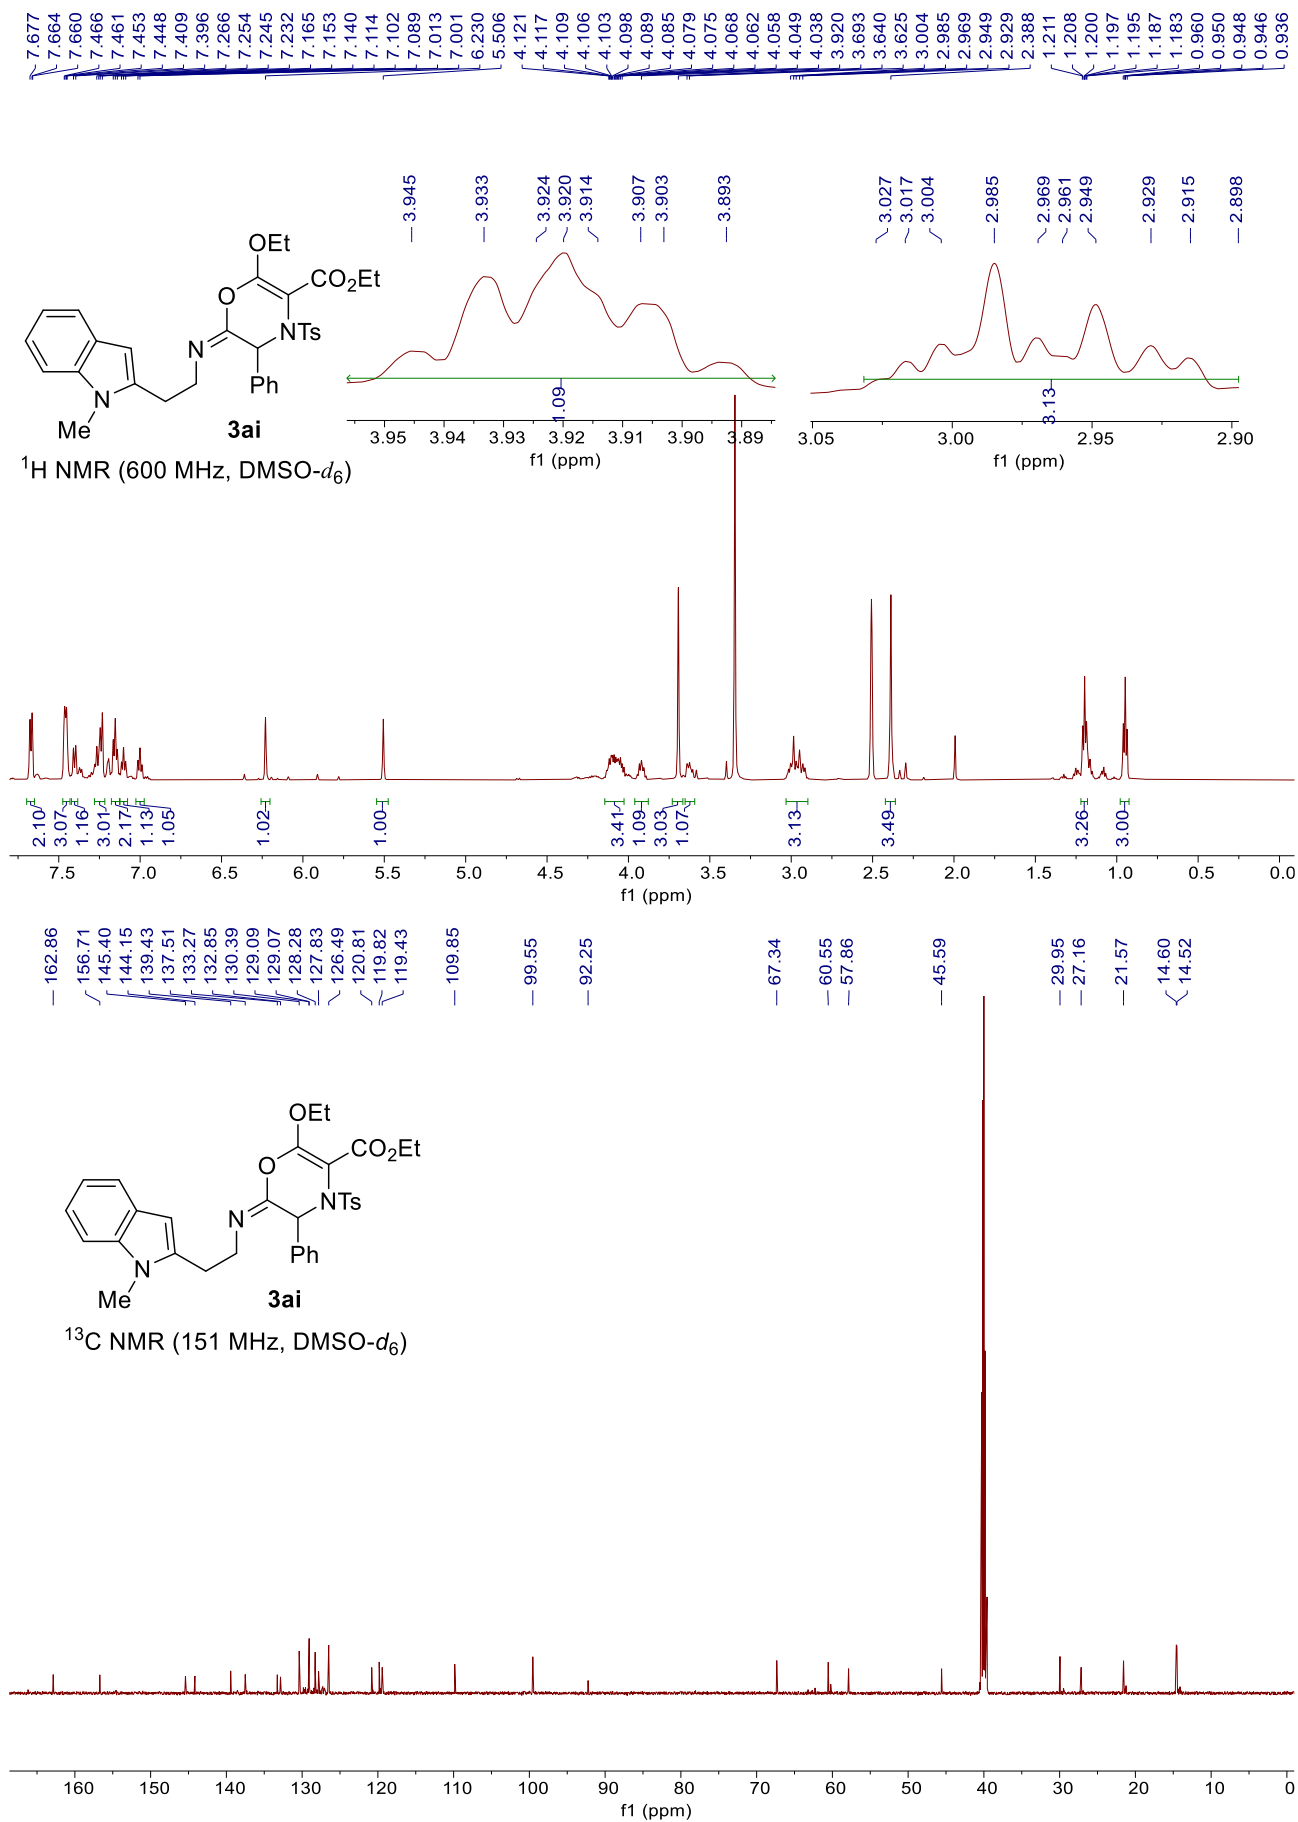

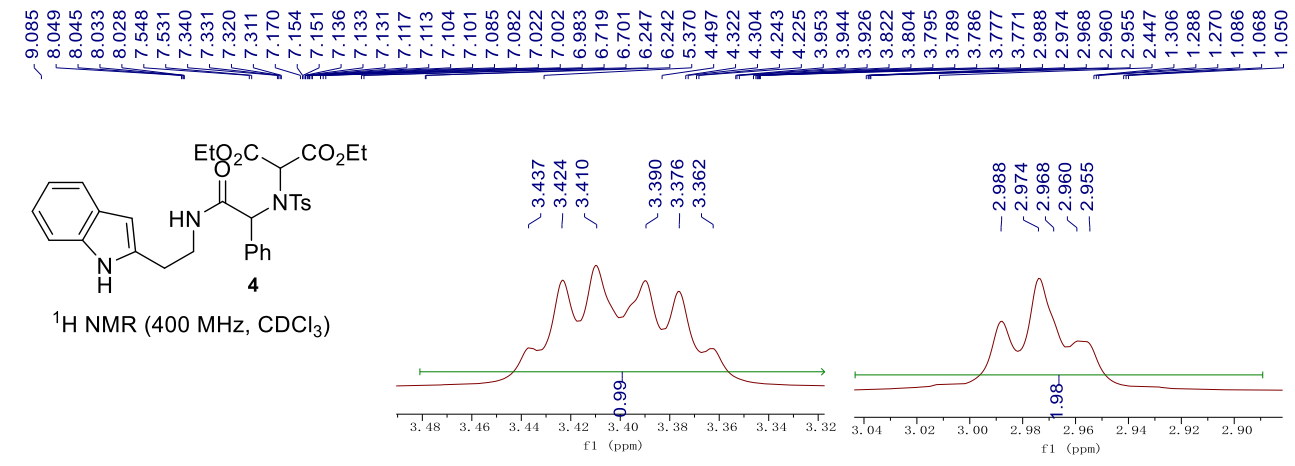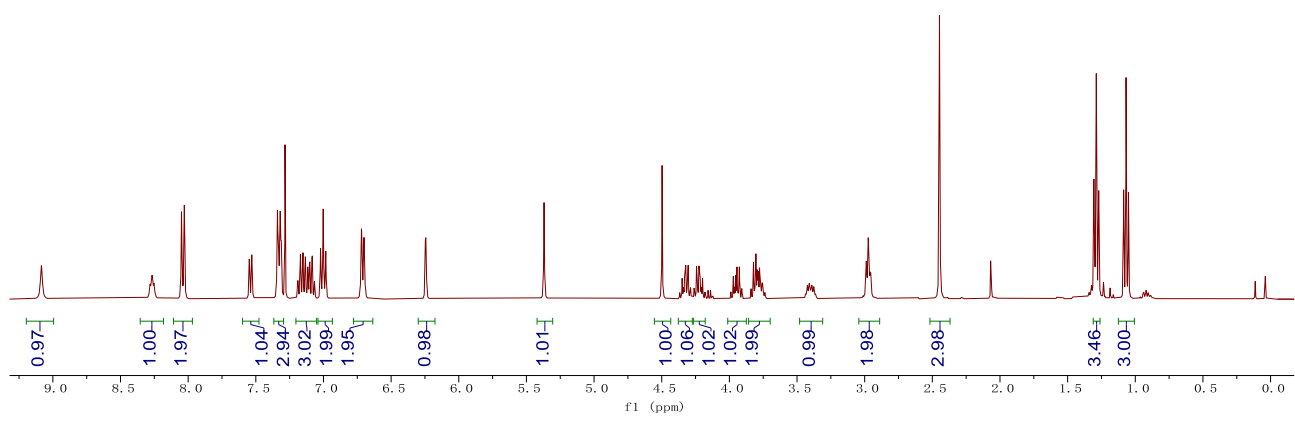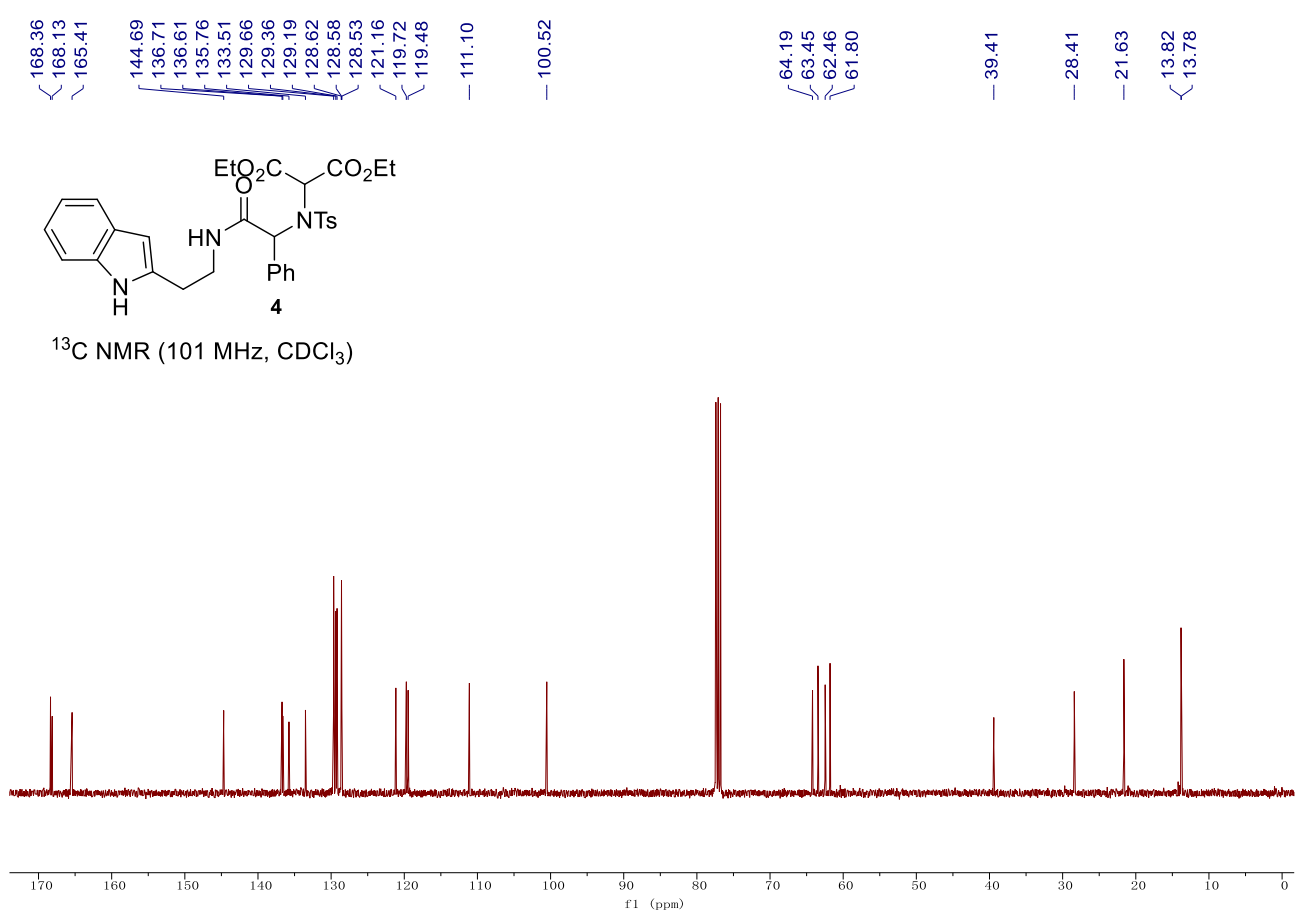

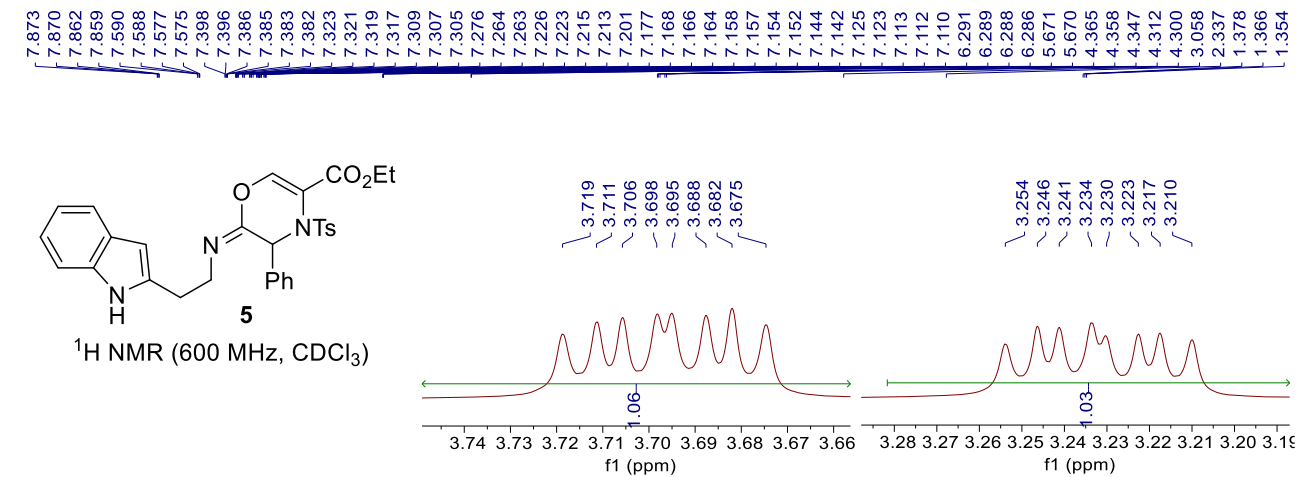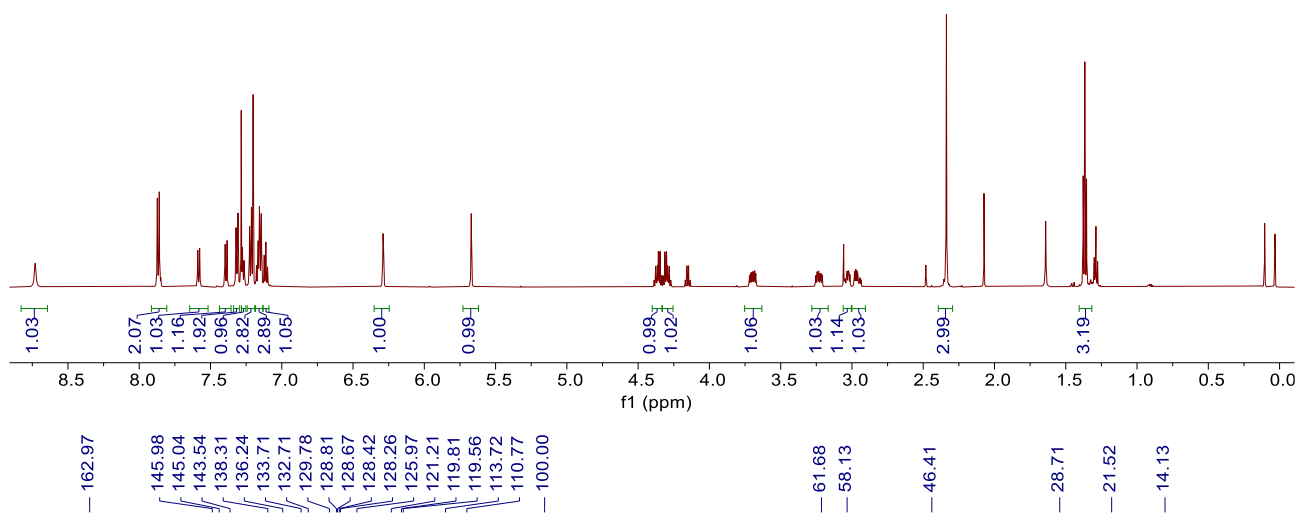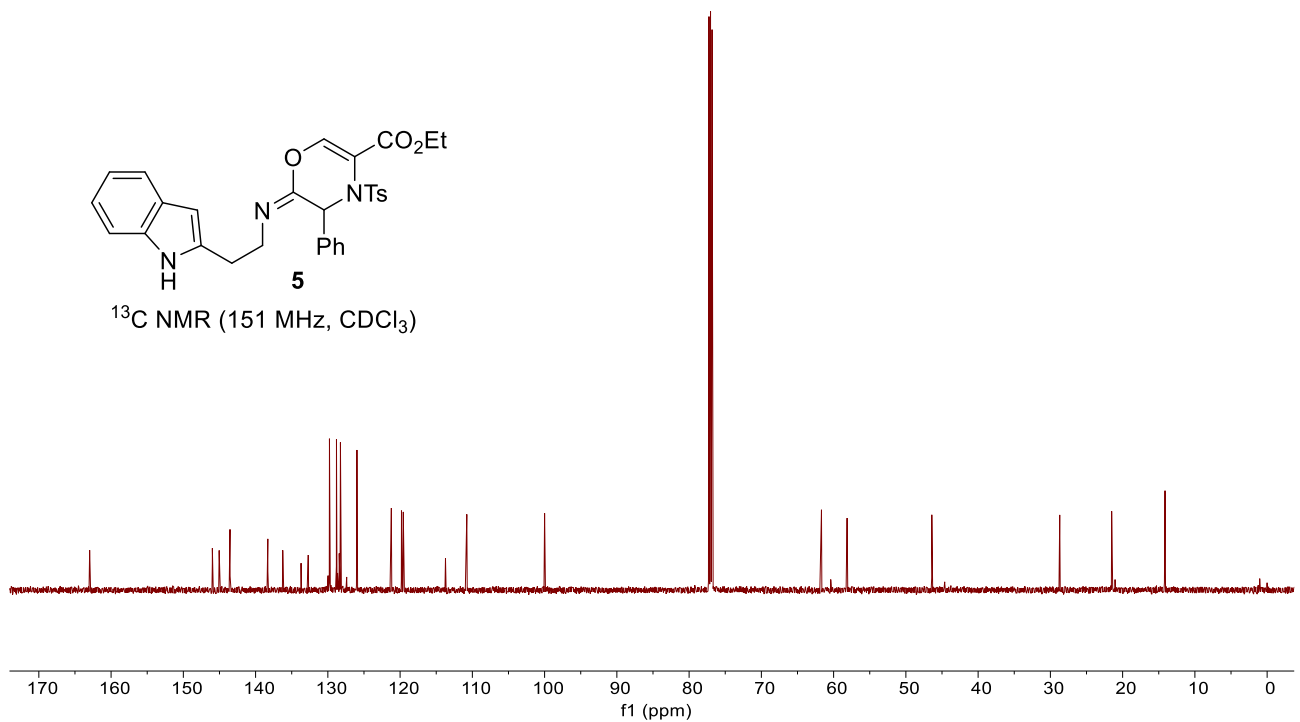

## 9. References

1. a) P. Dong, Z. J. Li, X. H. Liu, S. X. Dong, X. M. Feng, *Org. Chem. Front.*, **2022**, *9*, 4591–4597; b) X. W. Li, L. Li, J. L. Zhang, *Adv. Synth. Catal.*, **2012**, *354*, 3485–3489.
2. a) X. H. Zhao, X. H. Liu, H. J. Mei, J. Guo, L. L. Lin, X. M. Feng, *Angew. Chem. Int. Ed.*, **2015**, *54*, 4032–4035; b) H. Liu, A. Domling, *J. Org. Chem.*, **2009**, *74*, 6895–6898.
3. P. Hohenberg, W. Kohn, *Phys. Rev.* **1964**, *136*, B864–B871; b) W. Kohn, L. J. Sham, *Phys. Rev.* **1965**, *140*, A1133–A1138.
4. Y. Zhao, D. G. Truhlar, *Theor. Chem. Acc.* **2008**, *120*, 215–241.
5. S. Grimme, J. Antony, S. Ehrlich, H. Krieg, *J. Chem. Phys.* **2010**, *132*, 154104.
6. A. V. Marenich, C. J. Cramer, D. G. Truhlar, *J. Phys. Chem. B* **2009**, *113*, 6378–6396.
7. K. Fukui, *Acc. Chem. Res.* **1981**, *14*, 363–368.
8. M. J. Frisch, G. W. Trucks, H. B. Schlegel, G. E. Scuseria, M. A. Robb, J. R. Cheeseman, G. Scalmani, V. Barone, G. A. Petersson, H. Nakatsuji, X. Li, M. Caricato, A. V. Marenich, J. Bloino, B. G. Janesko, R. Gomperts, B. Mennucci, H. P. Hratchian, J. V. Ortiz, A. F. Izmaylov, J. L. Sonnenberg, D. Williams-Young, F. Ding, F. Lipparini, F. Egidi, J. Goings, B. Peng, A. Petrone, T. Henderson, D. Ranasinghe, V. G. Zakrzewski, J. Gao, N. Rega, G. Zheng, W. Liang, M. Hada, M. Ehara, K. Toyota, R. Fukuda, J. Hasegawa, M. Ishida, T. Nakajima, Y. Honda, O. Kitao, H. Nakai, T. Vreven, K. Throssell, J. A. Jr. Montgomery, J. E. Peralta, F. Ogliaro, M. J. Bearpark, J. J. Heyd, E. N. Brothers, K. N. Kudin, V. N. Staroverov, T. A. Keith, R. Kobayashi, J. Normand, K. Raghavachari, A. P. Rendell, J. C. Burant, S. S. Iyengar, J. Tomasi, M. Cossi, J. M. Millam, M. Klene, C. Adamo, R. Cammi, J. W. Ochterski, R. L. Martin, K. Morokuma, O. Farkas, J. B. Foresman, D. J. Fox, *Gaussian 16*, revision B.01, Gaussian, Inc.: Wallingford, CT, 2016.
